# Supplementary material
Source: publisher site journal article supplement (https://www.spandidos-publications.com/2991/downloadSupplementary)
Supplement: Supplementary file 1 [file downloadSupplementary]

## Sheet: Table_S1_complete_data
Table SI. Proteins identified in 30 samples (complete data; LFQ intensity, MS count and intensity; Control versus MET).
Ratio H/L normalized C_MET_1	Ratio H/L normalized C_MET_2	Ratio H/L normalized C_MET_3	Only identified by site	Reverse	Contaminant	Unique peptides	Sequence coverage [%]	Mol. weight [kDa]	Intensity C_MET_1	Intensity L C_MET_1	Intensity H C_MET_1	Intensity C_MET_2	Intensity L C_MET_2	Intensity H C_MET_2	Intensity C_MET_3	Intensity L C_MET_3	Intensity H C_MET_3	Fasta headers	Protein IDs	Majority protein IDs	Protein names	Gene names	Proteins
NaN	NaN	NaN	Only identified by site	Reverse	Contaminant	NaN	NaN	NaN	NaN	NaN	NaN	NaN	NaN	NaN	NaN	NaN	NaN	NaN	A0A024R4E5;Q00341;Q00341-2;H0Y394;H7C0A4;C9JIZ1;C9J5Protein IDs	Majority protein IDs	Protein names	Gene names	Proteins
NaN	NaN	NaN				1	5.1	44.822	0	0	0	0	0	0	0	0	0	NaN	A0A087X1N8;A0A024QZX5;P35237	A0A087X1N8;A0A024QZX5;P35237	Serpin B6	SERPINB6	3
0.90642	0.92234	0.89175				2	10.9	20.159	100330000	59951000	40378000	109970000	58430000	51544000	152100000	91628000	60475000	NaN	P02511;E9PR44;E9PRA8;E9PJL7;A0A024R3B9;E9PNH7	P02511;E9PR44;E9PRA8;E9PJL7;A0A024R3B9;E9PNH7	Alpha-crystallin B chain	CRYAB	6
0.79763	0.82905	1.0944				4	4.3	141.44	35460000	22095000	13365000	61066000	35066000	26000000	55882000	32669000	23212000	NaN	A0A024R4E5;Q00341;Q00341-2;H0Y394;H7C0A4;C9JIZ1;C9J5E5;C9JZI8;C9JES8;C9JHZ8;C9JK79;C9JHS7;C9JT62;C9JHN6;C9JEJ8;C9JBS3;C9JQ82;C9JMQ6	A0A024R4E5;Q00341;Q00341-2;H0Y394	Vigilin	HDLBP	18
1.3438	1.4568	1.3295				3	12.9	22.591	14431000	7808200	6623200	28300000	12375000	15925000	23596000	11857000	11739000	NaN	A0A024R4M0;P46781;C9JM19;B5MCT8	A0A024R4M0;P46781;C9JM19;B5MCT8	40S ribosomal protein S9	RPS9	4
NaN	NaN	NaN				1	2.2	61.927	0	0	0	0	0	0	0	0	0	NaN	A0A024R571;Q9H4M9;C9JC03;C9J2Z4	A0A024R571;Q9H4M9;C9JC03;C9J2Z4	EH domain-containing protein 1	EHD1	4
1.0246	1.1437	1.0026				1	2.3	46.825	3752200	2142000	1610200	7445500	3965900	3479700	15832000	8653600	7178000	NaN	Q8TCT9-2;Q8TCT9-4;Q8TCT9;Q8TCT9-5;A0A075B6F6	Q8TCT9-2;Q8TCT9-4;Q8TCT9;Q8TCT9-5;A0A075B6F6	Minor histocompatibility antigen H13	HM13	5
0.63803	0.96282	0.83447				1	6	20.825	2162200	1468300	693930	2677200	1498000	1179200	3503300	1985300	1518000	NaN	P61224;P62834;F5H7Y6;P61224-3;E7ESV4;F5GX62;P61224-2;F5GYB5;A0A075B6Q0;F5H004;F5H6R7;F5H500;F5H0B7;F5H491;F5GWU8;F5H077;F5GYH7;F5H4H0	P61224;P62834;F5H7Y6;P61224-3;E7ESV4;F5GX62;P61224-2;F5GYB5;A0A075B6Q0;F5H004;F5H6R7;F5H500;F5H0B7;F5H491;F5GWU8;F5H077;F5GYH7;F5H4H0	Ras-related protein Rap-1b;Ras-related protein Rap-1A	RAP1B;RAP1A	18
NaN	NaN	NaN				1	38.1	2.1104	0	0	0	0	0	0	0	0	0	NaN	A0A075B6Z2	A0A075B6Z2			1
1.3398	1.2321	1.3379				1	5.2	21.643	38452000	18949000	19503000	45403000	19728000	25674000	23792000	11644000	12147000	NaN	A0A075B716;H0YN88;P08708	A0A075B716;H0YN88;P08708	40S ribosomal protein S17	RPS17L;RPS17	3
NaN	0.60833	0.69805				1	7.2	49.775	0	0	0	5938500	4060900	1877700	9033100	5840800	3192300	NaN	Q3ZCM7;Q5SQY0;A0A075B736	Q3ZCM7;Q5SQY0;A0A075B736	Tubulin beta-8 chain	TUBB8;RP11-631M21.2	3
1.0403	1.0179	1.0617				3	6.2	70.923	44737000	23926000	20811000	20896000	10092000	10804000	41748000	23514000	18234000	NaN	Q16881;A0A087WSY9;Q16881-6;Q16881-3;A0A182DWI3;Q16881-4;A0A087WSW9;Q16881-2;Q16881-5;F8W809;E9PIR7;E9PKD3;E9PIZ5;A0A0B4J225;E9PKI4;E9PLT3;E9PQI3;Q16881-7;E2QRB9;E9PJU2	Q16881;A0A087WSY9;Q16881-6;Q16881-3;A0A182DWI3;Q16881-4;A0A087WSW9;Q16881-2;Q16881-5;F8W809;E9PIR7;E9PKD3;E9PIZ5;A0A0B4J225;E9PKI4;E9PLT3;E9PQI3	Thioredoxin reductase 1, cytoplasmic	TXNRD1	20
0.8034	1.0094	0.82475				3	9.1	53.218	14270000	8771600	5498300	12349000	5770300	6578300	14592000	9202900	5389400	NaN	P49753;A0A087WT95;A0A087X0W7;Q86TX2;P49753-2;G3V4F2	P49753;A0A087WT95;A0A087X0W7;Q86TX2;P49753-2;G3V4F2	Acyl-coenzyme A thioesterase 2, mitochondrial;Acyl-coenzyme A thioesterase 1	ACOT2;ACOT1	6
0.9023	0.83959	1.131				3	5.8	73.027	13883000	7810800	6071900	15980000	8468200	7511600	17103000	9338000	7764600	NaN	A0A087WTP3;Q92945;M0R0C6;M0QYG1;M0R0I5	A0A087WTP3;Q92945;M0R0C6;M0QYG1	Far upstream element-binding protein 2	KHSRP	5
NaN	1.0154	0.98258				0	6.3	70.67	0	0	0	29921000	15363000	14558000	78586000	42149000	36437000	NaN	P11940;E7EQV3;P11940-2;A0A087WTT1;Q4VXU2	P11940;E7EQV3;P11940-2;A0A087WTT1;Q4VXU2	Polyadenylate-binding protein 1;Polyadenylate-binding protein 1-like	PABPC1;PABPC1L	5
NaN	1.1243	1.3275				1	3.8	37.92	0	0	0	1335100	612930	722190	2294600	1184700	1110000	NaN	O15126;A0A087WXB0;A0A087WU14	O15126;A0A087WXB0;A0A087WU14	Secretory carrier-associated membrane protein 1	SCAMP1	3
NaN	NaN	NaN				1	1.1	105.69	0	0	0	0	0	0	0	0	0	NaN	P63010-2;P63010;A0A087X253;P63010-3;A0A087WZQ6;A0A087WU93;A0A087WYD1	P63010-2;P63010;A0A087X253;P63010-3;A0A087WZQ6;A0A087WU93;A0A087WYD1	AP-2 complex subunit beta	AP2B1	7
NaN	0.33408	0.63231	+			1	3.1	46.437	0	0	0	4175400	2911200	1264300	4534700	3310100	1224500	NaN	O14979;A0A087WUK2;O14979-2;O14979-3	O14979;A0A087WUK2;O14979-2;O14979-3	Heterogeneous nuclear ribonucleoprotein D-like	HNRPDL	4
NaN	NaN	NaN				1	1.8	88.209	0	0	0	0	0	0	0	0	0	NaN	A0A087WX23;A0A087WUL4;Q86TG7;A0A087WXK2;B4DSP0;A0A087WZG9;Q86TG7-2	A0A087WX23;A0A087WUL4;Q86TG7;A0A087WXK2;B4DSP0;A0A087WZG9;Q86TG7-2	Retrotransposon-derived protein PEG10	PEG10;hCG_1642748	7
NaN	1.2173	NaN				1	4.4	22.106	0	0	0	13105000	7407400	5697800	0	0	0	NaN	P07203;A0A087WUQ6	P07203;A0A087WUQ6	Glutathione peroxidase 1	GPX1	2
1.3764	1.2395	1.0982				2	9	32.43	19481000	9629300	9851600	28886000	12564000	16322000	16677000	8777400	7899800	NaN	P62847-4;P62847;A0A087WUS0;P62847-3;E7ETK0;P62847-2	P62847-4;P62847;A0A087WUS0;P62847-3;E7ETK0;P62847-2	40S ribosomal protein S24	RPS24	6
1.1677	1.4312	NaN				4	4.4	138.68	8612800	4328300	4284500	20720000	10059000	10661000	0	0	0	NaN	A0A087WUT6;O60841	A0A087WUT6;O60841	Eukaryotic translation initiation factor 5B	EIF5B	2
1.1527	1.0509	0.9548				6	3.4	274.83	12433000	7291300	5141800	30257000	14822000	15435000	32970000	21131000	11839000	NaN	A0A087WUZ3;Q01082;Q01082-2;Q01082-3;F8W6C1	A0A087WUZ3;Q01082;Q01082-2;Q01082-3	Spectrin beta chain, brain 1	SPTBN1	5
1.2165	1.0863	1.2064				3	6.3	50.14	324680000	176250000	148430000	245320000	117440000	127880000	166270000	86361000	79912000	NaN	P68104;Q5VTE0;A0A087WV01;Q05639;A0A087WVQ9;P68104-2;Q5JR01;A6PW80	P68104;Q5VTE0;A0A087WV01;Q05639	Elongation factor 1-alpha 1;Putative elongation factor 1-alpha-like 3;Elongation factor 1-alpha 2	EEF1A1;EEF1A1P5;EEF1A2	8
1.6364	1.5775	1.6766				1	6.1	24.604	10166000	4785900	5380100	23102000	9054900	14047000	8735900	4008100	4727900	NaN	P27635;X1WI28;A0A087WV22;F8W7C6	P27635;X1WI28;A0A087WV22;F8W7C6	60S ribosomal protein L10	RPL10	4
0.82795	0.93918	0.92413				6	4.6	192.06	33565000	20915000	12650000	34270000	18010000	16260000	60584000	34461000	26122000	NaN	A0A087WVQ6;Q00610;Q00610-2;P53675;P53675-2;A0A087WX41;J3KS13;K7EJJ5;F5H5N6;J3KRF5;J3KSQ2	A0A087WVQ6;Q00610;Q00610-2	Clathrin heavy chain 1	CLTC	11
NaN	0.75148	0.4688				1	1.7	138.03	0	0	0	221940	137260	84679	158450	119590	38862	NaN	Q9ULU4-19;Q9ULU4-7;Q9ULU4-11;Q9ULU4-10;Q9ULU4-13;Q9ULU4;Q9ULU4-20;Q9ULU4-5;Q9ULU4-9;Q9ULU4-16;Q9ULU4-22;Q9ULU4-12;A0A087WVZ6;Q9ULU4-14;Q9ULU4-18;Q9ULU4-21;Q9ULU4-8;Q9ULU4-23;H7C4X9;Q9ULU4-15;A0A087WYS3;Q9ULU4-17;Q9ULU4-6;Q9ULU4-3;Q9ULU4-4;Q9ULU4-2	Q9ULU4-19;Q9ULU4-7;Q9ULU4-11;Q9ULU4-10;Q9ULU4-13;Q9ULU4;Q9ULU4-20;Q9ULU4-5;Q9ULU4-9;Q9ULU4-16;Q9ULU4-22;Q9ULU4-12;A0A087WVZ6;Q9ULU4-14;Q9ULU4-18;Q9ULU4-21;Q9ULU4-8;Q9ULU4-23;H7C4X9;Q9ULU4-15;A0A087WYS3;Q9ULU4-17;Q9ULU4-6;Q9ULU4-3;Q9ULU4-4;Q9ULU4-2	Protein kinase C-binding protein 1	ZMYND8	26
0.9766	0.96021	0.95536				3	5.8	105.85	12913000	6866400	6046200	27981000	14928000	13053000	38199000	20896000	17304000	NaN	A0A087WW66;Q99460;Q99460-2;C9J9M4;H7C378;H7BZR6	A0A087WW66;Q99460;Q99460-2	26S proteasome non-ATPase regulatory subunit 1	PSMD1	6
NaN	NaN	0.98517				1	4.7	23.906	0	0	0	0	0	0	6574300	3906200	2668200	NaN	Q9UQN3;C9J0A7;A0A087WW88;Q9UQN3-2	Q9UQN3;C9J0A7;A0A087WW88;Q9UQN3-2	Charged multivesicular body protein 2b	CHMP2B	4
1.1898	0.96402	1.4036				3	10.1	19.398	1041800	547890	493940	1284000	633950	650080	410510	224360	186150	NaN	Q9GZZ1;E7EQ69;C9J5D1;B0AZT5;A0A087WWJ2;Q9GZZ1-2;A0A0D9SF32;C9J5J3	Q9GZZ1;E7EQ69;C9J5D1;B0AZT5;A0A087WWJ2;Q9GZZ1-2;A0A0D9SF32;C9J5J3	N-alpha-acetyltransferase 50	NAA50	8
NaN	NaN	0.96823	+			1	3.9	31.629	0	0	0	0	0	0	15390000	9199100	6191400	NaN	P21912;A0A087WWT1;A0A087WXX8	P21912;A0A087WWT1;A0A087WXX8	Succinate dehydrogenase [ubiquinone] iron-sulfur subunit, mitochondrial	SDHB	3
NaN	NaN	NaN				1	2.7	72.675	0	0	0	0	0	0	0	0	0	NaN	A0A087WWV0	A0A087WWV0			1
1.1462	NaN	NaN				2	5.6	44.739	5219400	2835000	2384500	0	0	0	0	0	0	NaN	Q13148;A0A087WYY0;A0A087X260;G3V162;B1AKP7;A0A087WX29;Q13148-4;K7EN94;A0A087WV68;K7EJM5;A0A087WXQ5;A0A087WXV3;A0A087WX67;A0A087WW61;A0A087WZC9;A0A087WYE7;K7EL26;A0A087WTZ4	Q13148;A0A087WYY0;A0A087X260;G3V162;B1AKP7;A0A087WX29;Q13148-4;K7EN94;A0A087WV68;K7EJM5;A0A087WXQ5;A0A087WXV3;A0A087WX67;A0A087WW61;A0A087WZC9;A0A087WYE7;K7EL26;A0A087WTZ4	TAR DNA-binding protein 43	TARDBP	18
NaN	1.1784	0.94329				1	2.2	74.316	0	0	0	6492300	2982300	3510000	12575000	7727000	4847800	NaN	Q7Z4V5;Q7Z4V5-2;K7EPS6;A0A087WX58	Q7Z4V5;Q7Z4V5-2;K7EPS6;A0A087WX58	Hepatoma-derived growth factor-related protein 2	HDGFRP2	4
NaN	NaN	0.90665				1	2.9	42.153	0	0	0	0	0	0	76219	46511	29708	NaN	Q16186;A0A087WX59	Q16186;A0A087WX59	Proteasomal ubiquitin receptor ADRM1	ADRM1	2
0.78527	0.88103	2.0926				1	2.3	74.471	27114000	17819000	9295000	68836000	39873000	28963000	45389000	28379000	17010000	NaN	A0A087WXA8	A0A087WXA8			1
1.637	1.7518	1.5348				3	14.5	26.372	78164000	35119000	43045000	65781000	25971000	39810000	51851000	24317000	27534000	NaN	A0A0A6YYL6;P18621-3;A0A0A0MRF8;P18621;J3KRX5;J3QLC8;J3QQT2;A0A087WXM6;P18621-2;J3QS96;A0A087WWH0;J3KRB3;A0A087WY81;J3KSJ0	A0A0A6YYL6;P18621-3;A0A0A0MRF8;P18621;J3KRX5;J3QLC8;J3QQT2;A0A087WXM6;P18621-2;J3QS96;A0A087WWH0;J3KRB3;A0A087WY81	60S ribosomal protein L17	RPL17	14
0.94852	NaN	NaN				1	4.8	38.534	20984000	12814000	8169600	0	0	0	0	0	0	NaN	Q9UJZ1;Q9UJZ1-2;A0A087WYB4;F2Z2I8	Q9UJZ1;Q9UJZ1-2;A0A087WYB4;F2Z2I8	Stomatin-like protein 2	STOML2	4
2.1001	NaN	NaN				1	1.2	147.15	1058500	397650	660840	0	0	0	0	0	0	NaN	A0A096LPC5;A0A0A0MR88;Q641Q2;Q641Q2-2;Q9Y4E1-4;Q9Y4E1;Q9Y4E1-2;E7ESD2;Q9Y4E1-6;Q9Y4E1-3;J3KP36;F8W7U3;A0A087WYF6;Q9Y4E1-5	A0A096LPC5;A0A0A0MR88;Q641Q2;Q641Q2-2;Q9Y4E1-4;Q9Y4E1;Q9Y4E1-2;E7ESD2;Q9Y4E1-6;Q9Y4E1-3;J3KP36;F8W7U3;A0A087WYF6;Q9Y4E1-5	WASH complex subunit FAM21A;WASH complex subunit FAM21C	FAM21A;FAM21C	14
NaN	0.84594	1.1018				1	0.9	155.29	0	0	0	3616400	2217600	1398800	2934200	1619100	1315100	NaN	A0A087WYN9;Q7Z478	A0A087WYN9;Q7Z478	ATP-dependent RNA helicase DHX29	DHX29	2
1.2376	1.1963	1.3449				2	11.1	16.156	13935000	7318600	6616500	5517100	2405300	3111700	2353100	1190000	1163100	NaN	P09132;A0A087WYR0	P09132;A0A087WYR0	Signal recognition particle 19 kDa protein	SRP19	2
NaN	1.4237	0.9826				2	10	24.853	0	0	0	5992300	2643600	3348700	10950000	6596000	4353900	NaN	O43399-7;A0A087WYR3;O43399-5;O43399;O43399-3;O43399-4;O43399-2;A0A087WZ51	O43399-7;A0A087WYR3;O43399-5;O43399;O43399-3;O43399-4;O43399-2;A0A087WZ51	Tumor protein D54	TPD52L2	8
1.0916	1.2225	1.0833				3	5.6	57.805	37416000	20519000	16897000	75538000	32303000	43235000	84056000	45912000	38144000	NaN	E7EUC7;A0A087WYS1;Q16851;Q16851-2;C9JNZ1;C9JQU9;C9JVG3;C9JWG0;C9JUW1;C9JTZ5;F2Z3H1	E7EUC7;A0A087WYS1;Q16851;Q16851-2;C9JNZ1;C9JQU9;C9JVG3;C9JWG0;C9JUW1;C9JTZ5;F2Z3H1	UTP--glucose-1-phosphate uridylyltransferase	UGP2	11
0.64432	NaN	0.88156	+			1	2	68.171	61263000	41824000	19439000	0	0	0	71212000	45183000	26029000	NaN	Q6ZTN6-3;Q6ZTN6;A0A087WYW0	Q6ZTN6-3;Q6ZTN6;A0A087WYW0	Ankyrin repeat domain-containing protein 13D	ANKRD13D	3
NaN	NaN	1.9679				1	6.6	17.107	0	0	0	0	0	0	1220200	531880	688350	NaN	Q6IPX4;P62249;A0A087WZ27;M0R210;M0R3H0;M0R1M5;M0QX76	Q6IPX4;P62249;A0A087WZ27;M0R210;M0R3H0;M0R1M5;M0QX76	40S ribosomal protein S16	RPS16	7
1.2261	1.2777	1.1995				2	8.5	41.581	898310	451900	446410	2694800	1201400	1493400	420380	221460	198920	NaN	B3KS98;O15372;A0A087WZK9;E5RGU4;E5RFH0;E5RFW7;E5RH59;E5RHC7	B3KS98;O15372;A0A087WZK9;E5RGU4;E5RFH0;E5RFW7;E5RH59;E5RHC7	Eukaryotic translation initiation factor 3 subunit H	EIF3S3;EIF3H	8
1.2751	1.1037	1.1871				1	10.3	34.882	41138000	21136000	20002000	225860000	103640000	122220000	59519000	32706000	26814000	NaN	P0DME0;A0A087X027;Q01105;Q01105-4;A0A0C4DFV9;Q01105-3	P0DME0;A0A087X027;Q01105;Q01105-4;A0A0C4DFV9;Q01105-3	Protein SET	SET	6
1.2484	1.4365	1.3948				6	7.8	111.33	30516000	18071000	12445000	107850000	44673000	63174000	93056000	49552000	43504000	NaN	Q9Y4L1;A0A087X054;K7EQK2;A0A087WWI4;E9PJ21;Q9Y4L1-2;J3KTF1;J3QL06;J3QLE9;J3QQH7;Q9BST8;A0A087WW13;A0A087X214	Q9Y4L1;A0A087X054	Hypoxia up-regulated protein 1	HYOU1	13
1.0911	0.90836	0.92554				1	1.7	63.86	2883300	1444100	1439100	1387400	572290	815160	2228900	1276600	952350	NaN	Q7Z739;A0A087X0Q1;S4R373;A0A087X0C3	Q7Z739;A0A087X0Q1;S4R373;A0A087X0C3	YTH domain family protein 3	YTHDF3	4
1.2491	1.3169	1.2751				1	5.2	19.825	11093000	5820700	5272700	16400000	7303500	9096400	13737000	6840000	6896600	NaN	A0A087X0R6;Q9UMY4;Q9UMY4-2;Q9UMY4-3	A0A087X0R6;Q9UMY4;Q9UMY4-2;Q9UMY4-3	Sorting nexin-12	SNX12	4
NaN	NaN	0.63737				2	4.4	77.569	0	0	0	0	0	0	11973000	6347400	5625200	NaN	A0A087X0X3;P52272;P52272-2;M0R2T0;M0R019;M0R0N3;M0QYQ7;M0R0Y6	A0A087X0X3;P52272;P52272-2;M0R2T0;M0R019;M0R0N3;M0QYQ7;M0R0Y6	Heterogeneous nuclear ribonucleoprotein M	HNRNPM	8
NaN	1.1693	NaN				1	0.9	139.47	0	0	0	1263500	606570	656970	0	0	0	NaN	A0A087X117;A0A0G2JN29;J3KN36;Q5JPE7;P69849;Q15155;Q5JPE7-2	A0A087X117;A0A0G2JN29;J3KN36;Q5JPE7;P69849;Q15155;Q5JPE7-2	Nodal modulator 2;Nodal modulator 3;Nodal modulator 1	NOMO2;NOMO3;NOMO1	7
NaN	NaN	0.90211				1	6.4	26.41	0	0	0	0	0	0	1587600	962170	625430	NaN	Q9NP72-2;Q9NP72;A0A087X163;Q5W0J0;Q9NP72-3	Q9NP72-2;Q9NP72;A0A087X163;Q5W0J0;Q9NP72-3	Ras-related protein Rab-18	RAB18	5
1.9316	0.90434	1.7206				1	3.4	36.748	1827900	997320	830620	10517000	5865600	4651200	8626400	5047500	3579000	NaN	Q9NUQ9;A0A087X178;E5RI16;E5RJL8;E5RIR8;E5RJE1	Q9NUQ9;A0A087X178;E5RI16;E5RJL8;E5RIR8;E5RJE1	Protein FAM49B	FAM49B	6
0.78372	2.0612	0.88516				3	16.1	24.669	35710000	23564000	12145000	31608000	17415000	14193000	24141000	14670000	9471900	NaN	O75608;O75608-2;B4DP64;A0A087X1K9;E5RGR0;E5RI35;E5RJ48	O75608;O75608-2;B4DP64;A0A087X1K9;E5RGR0	Acyl-protein thioesterase 1	LYPLA1	7
NaN	NaN	0.77343				1	1.1	131.85	0	0	0	0	0	0	1697300	1037900	659370	NaN	Q9Y2H6;Q9Y2H6-2;G5E9X3;A0A087X1M6	Q9Y2H6;Q9Y2H6-2;G5E9X3;A0A087X1M6	Fibronectin type-III domain-containing protein 3A	FNDC3A	4
0.73878	0.72876	0.80317				3	10.2	29.126	13912000	9857100	4055200	21651000	13737000	7913800	34021000	23602000	10419000	NaN	A0A087X1Z3;Q9UL46;H0YM70;H0YKU2	A0A087X1Z3;Q9UL46;H0YM70	Proteasome activator complex subunit 2	PSME2	4
1.0981	1.1027	1.1226	+			1	12.3	8.0255	34254000	19148000	15106000	14507000	7329600	7177100	18532000	9854600	8677900	NaN	A0A087X202	A0A087X202			1
1.9335	1.3764	NaN				2	2.4	144.37	8122400	2972900	5149500	12000000	4568700	7431200	0	0	0	NaN	Q92823-5;Q92823;Q92823-2;C9JYY6;Q92823-6;Q92823-4;Q92823-3;A0A087X2B3;F8W775	Q92823-5;Q92823;Q92823-2;C9JYY6;Q92823-6;Q92823-4;Q92823-3;A0A087X2B3;F8W775	Neuronal cell adhesion molecule	NRCAM	9
NaN	1.224	NaN				2	7.3	42.2	0	0	0	4165900	1567900	2598000	0	0	0	NaN	P35613;P35613-2;A0A087X2B5;I3L192;P35613-4;A0A087WUV8;P35613-3;R4GMX5;R4GN83	P35613;P35613-2;A0A087X2B5;I3L192;P35613-4;A0A087WUV8;P35613-3;R4GMX5;R4GN83	Basigin	BSG	9
NaN	NaN	NaN				1	1.1	146.2	0	0	0	0	0	0	0	0	0	NaN	O60271;A0A087X2D8;O60271-2;O60271-4;O60271-9	O60271;A0A087X2D8;O60271-2;O60271-4;O60271-9	C-Jun-amino-terminal kinase-interacting protein 4	SPAG9	5
0.67529	1.2346	1.0329				2	2.8	82.431	14085000	8534900	5549700	3714000	1809900	1904100	17428000	10285000	7143500	NaN	Q92499;A0A087X2G1;F1T0B3;Q92499-2;Q92499-3	Q92499;A0A087X2G1;F1T0B3;Q92499-2;Q92499-3	ATP-dependent RNA helicase DDX1	DDX1	5
NaN	1.7625	0.9898				1	2.7	45.796	0	0	0	16762000	9812100	6950000	22639000	12890000	9749500	NaN	A0A087X2I1;P62333	A0A087X2I1;P62333	26S protease regulatory subunit 10B	PSMC6	2
NaN	NaN	NaN				1	0.7	270.21	0	0	0	0	0	0	0	0	0	NaN	O75376;A0A088AWL3;O75376-2;O75376-3;J3KS51;E7EW50;E7EVU5	O75376;A0A088AWL3;O75376-2;O75376-3;J3KS51;E7EW50;E7EVU5	Nuclear receptor corepressor 1	NCOR1	7
NaN	1.4091	0.84035				1	2.1	67.475	0	0	0	1155800	615930	539900	1445800	930420	515340	NaN	A0A088AWN2;Q8TBZ3-7;Q8TBZ3-2;Q8TBZ3;Q8TBZ3-6;Q8TBZ3-5;Q8TBZ3-3;H0YKE8;Q8TBZ3-8;G3V5V2	A0A088AWN2;Q8TBZ3-7;Q8TBZ3-2;Q8TBZ3;Q8TBZ3-6;Q8TBZ3-5;Q8TBZ3-3;H0YKE8;Q8TBZ3-8;G3V5V2	WD repeat-containing protein 20	WDR20	10
0.99245	0.97908	NaN				1	3.6	30.376	2180400	1290600	889830	1231500	624720	606740	0	0	0	NaN	A0A096LPI6;A0A0B4J2D5;P30042;H7C1F6;A0A0B4J2H4;P30042-2;H7C2G3;A0A096LNH5	A0A096LPI6;A0A0B4J2D5;P30042;H7C1F6;A0A0B4J2H4;P30042-2;H7C2G3;A0A096LNH5	ES1 protein homolog, mitochondrial	C21orf33	8
NaN	1.1907	NaN				1	0.6	217.75	0	0	0	691870	329010	362860	0	0	0	NaN	A0A096LNH6;Q14185	A0A096LNH6;Q14185	Dedicator of cytokinesis protein 1	DOCK1	2
NaN	0.65935	NaN				1	5.7	37.531	0	0	0	2875200	1690000	1185300	0	0	0	NaN	A0A0A0MQR2;Q9BY42;A2A2L5	A0A0A0MQR2;Q9BY42;A2A2L5	UPF0549 protein C20orf43	C20orf43	3
1.1558	0.93474	1.0174	+			1	0.5	140.69	2944100	1605000	1339100	950170	452360	497810	2754000	1496700	1257300	NaN	A0A0A0MQU5;A8MXZ9;Q14896;Q14896-2;F5GZR4	A0A0A0MQU5;A8MXZ9;Q14896;Q14896-2;F5GZR4	Myosin-binding protein C, cardiac-type	MYBPC3	5
0.93762	0.95402	1.1434				1	0.4	212.8	14558000	8394300	6163200	18784000	9594300	9189600	17134000	9951200	7182700	NaN	Q9UPS6;A0A0A0MQV9;Q9UPS6-2	Q9UPS6;A0A0A0MQV9;Q9UPS6-2	Histone-lysine N-methyltransferase SETD1B	SETD1B	3
1.069	1.2392	1.137				1	2.8	42.978	11958000	6713800	5244100	4835000	2253200	2581800	10893000	6501400	4391300	NaN	A0A0A0MQX8;Q9NR56;Q9NR56-5;Q9NR56-2;C9JP00;Q9NR56-6;Q9NR56-7;Q9NR56-4;Q9NR56-3	A0A0A0MQX8;Q9NR56;Q9NR56-5;Q9NR56-2;C9JP00;Q9NR56-6;Q9NR56-7;Q9NR56-4;Q9NR56-3	Muscleblind-like protein 1	MBNL1	9
0.63312	0.70506	0.61571				8	30.4	33.371	96530000	65784000	30746000	353580000	215020000	138560000	143600000	100350000	43259000	NaN	P45880-1;P45880;P45880-2;A0A0A0MR02;Q5JSD1;Q5JSD2;A2A3S1	P45880-1;P45880;P45880-2;A0A0A0MR02;Q5JSD1;Q5JSD2	Voltage-dependent anion-selective channel protein 2	VDAC2	7
1.0171	1.213	1.1197				1	1.8	95.737	1742400	1140800	601580	4437300	1847000	2590400	3809300	1906600	1902700	NaN	Q9BUJ2;Q9BUJ2-2;B7Z4B8;A0A0A0MRA5;Q9BUJ2-4;Q9BUJ2-3;M0R3F1;M0QYZ0	Q9BUJ2;Q9BUJ2-2;B7Z4B8;A0A0A0MRA5;Q9BUJ2-4;Q9BUJ2-3;M0R3F1;M0QYZ0	Heterogeneous nuclear ribonucleoprotein U-like protein 1	HNRNPUL1	8
1.4792	1.1644	NaN				2	0.3	798.85	2276100	1394400	881710	5785000	2679800	3105300	0	0	0	NaN	Q8WXH0-2;Q8WXH0;A0A0A0MRE3;G3V5X4;A0A0C4DGK3;Q8WXH0-7;G3V4T3;G3V3D4	Q8WXH0-2;Q8WXH0;A0A0A0MRE3;G3V5X4;A0A0C4DGK3;Q8WXH0-7;G3V4T3;G3V3D4	Nesprin-2	SYNE2	8
0.6569	1.1267	1.1278				2	6.2	47.804	5337400	3251600	2085700	1789300	786930	1002300	3714800	2085700	1629100	NaN	A0A0A0MRI2;Q9UNH7;G3V5X9;Q9UNH7-2;G3V4Z5;H0YJF8;G3V2U1	A0A0A0MRI2;Q9UNH7;G3V5X9;Q9UNH7-2;G3V4Z5;H0YJF8;G3V2U1	Sorting nexin-6	SNX6	7
1.3423	1.2657	1.3662				1	0.5	202.81	2663700	1236300	1427400	7974100	3167200	4806900	2218200	1033600	1184600	NaN	Q5VT25-6;Q5VT25-2;Q5VT25;Q5VT25-5;A0A0A0MRJ0;Q5VT25-4;Q5VT25-3;H0Y5V1;A0A0A0MRJ1	Q5VT25-6;Q5VT25-2;Q5VT25;Q5VT25-5;A0A0A0MRJ0;Q5VT25-4;Q5VT25-3;H0Y5V1;A0A0A0MRJ1	Serine/threonine-protein kinase MRCK alpha	CDC42BPA	9
0.71609	NaN	1.038				3	12.8	19.687	384570	285480	99085	0	0	0	1344200	559690	784500	NaN	A0A0A0MRR7;P09234	A0A0A0MRR7;P09234	U1 small nuclear ribonucleoprotein C	SNRPC	2
0.78316	0.84221	0.80922				6	6.2	152.45	17684000	11558000	6125400	58285000	32206000	26078000	38001000	23784000	14217000	NaN	A0A0A0MRV0;Q9P2E9;Q9P2E9-2;Q9P2E9-3;A0A087WVV2;F8W7S5;A0A087WU26;A2A2S5	A0A0A0MRV0;Q9P2E9;Q9P2E9-2;Q9P2E9-3;A0A087WVV2;F8W7S5	Ribosome-binding protein 1	RRBP1	8
NaN	1.0001	NaN				1	5.9	21.119	0	0	0	4963900	2631700	2332300	0	0	0	NaN	O75935;O75935-2;X6RLR1;A0A0A0MRV8;O75935-3;X6RCK5;X6RA56	O75935;O75935-2;X6RLR1;A0A0A0MRV8;O75935-3;X6RCK5;X6RA56	Dynactin subunit 3	DCTN3	7
1.875	0.80149	0.50574				1	1	117.51	15700000	10131000	5569500	19670000	11109000	8560500	25149000	16094000	9055300	NaN	Q5JRX3-2;Q5JRX3;Q5JRX3-3;A0A0A0MRX9;B1APQ0	Q5JRX3-2;Q5JRX3;Q5JRX3-3;A0A0A0MRX9;B1APQ0	Presequence protease, mitochondrial	PITRM1	5
0.79915	1.153	0.9707			+	2	4.1	85.696	11721000	7667800	4052900	11630000	5960700	5669200	17387000	10041000	7346000	NaN	P06396;CON__Q3SX14;A0A0A0MT01;A0A0A0MS51;P06396-3;P06396-4;P06396-2	P06396;CON__Q3SX14;A0A0A0MT01;A0A0A0MS51;P06396-3;P06396-4;P06396-2	Gelsolin	GSN	7
NaN	NaN	NaN				1	4	40.798	0	0	0	0	0	0	0	0	0	NaN	Q9UN36;Q9UN36-6;Q9UN36-3;Q9UN36-2;A0A0A0MS87;Q9UN36-4;G3V4S9;H0YJT9;G3V578;A0A0U1RR50;G3V5L7	Q9UN36;Q9UN36-6;Q9UN36-3;Q9UN36-2;A0A0A0MS87;Q9UN36-4;G3V4S9;H0YJT9;G3V578;A0A0U1RR50;G3V5L7	Protein NDRG2	NDRG2	11
0.98956	0.81897	0.87892				1	1.9	70.81	72422000	44249000	28173000	69985000	45576000	24409000	121370000	71630000	49736000	NaN	P13797;A0A0A0MSQ0;P13797-2;P13797-3;H7C4N2	P13797;A0A0A0MSQ0;P13797-2;P13797-3;H7C4N2	Plastin-3	PLS3	5
1.3231	1.0341	1.0258				2	18.9	36.867	11335000	5655100	5679500	82388000	40247000	42141000	27763000	15806000	11957000	NaN	A0A0A0MSS8;P42330;S4R3Z2;S4R3D5;P17516	A0A0A0MSS8;P42330;S4R3Z2;S4R3D5	Aldo-keto reductase family 1 member C3	AKR1C3	5
2.0465	NaN	NaN				2	0.4	596.48	197770	85694	112080	0	0	0	0	0	0	NaN	A0A0A0MTC1;Q63HN8-4;A0A0A0MTR7;Q63HN8;Q63HN8-5	A0A0A0MTC1;Q63HN8-4;A0A0A0MTR7;Q63HN8;Q63HN8-5	E3 ubiquitin-protein ligase RNF213	RNF213	5
NaN	0.34383	0.83102				2	4.3	54.611	0	0	0	5145800	2456100	2689800	3606000	2246600	1359400	NaN	A0A0A0MTH3;Q13418;Q13418-3;Q13418-2	A0A0A0MTH3;Q13418;Q13418-3;Q13418-2	Integrin-linked protein kinase	ILK	4
1.0186	1.0395	1.0202				7	18.8	64.824	990800000	564290000	426510000	1269800000	641510000	628260000	1115500000	640490000	475030000	NaN	A0A0A0MTS2;P06744-2;P06744;K7EQ48;A0A0J9YYH3;A0A0J9YX90;A0A0J9YXP8;K7ESF4;K7EPY4;K7EP41	A0A0A0MTS2;P06744-2;P06744;K7EQ48;A0A0J9YYH3;A0A0J9YX90;A0A0J9YXP8	Glucose-6-phosphate isomerase	GPI	10
0.9526	0.92347	1.1902				1	3.9	63.444	3680800	2432200	1248600	2024300	922080	1102200	2011300	958440	1052900	NaN	Q96JP5;A0A0A6YYC7;Q96JP5-2	Q96JP5;A0A0A6YYC7;Q96JP5-2	E3 ubiquitin-protein ligase ZFP91	ZFP91	3
1.3178	3.5653	0.79891				1	3.3	54.223	4926000	2219200	2706800	35199000	3633400	31566000	4817600	2598800	2218800	NaN	A0A0A6YYJ8;Q96HJ9-2;Q9Y383;Q9Y383-2;Q9Y383-3	A0A0A6YYJ8;Q96HJ9-2;Q9Y383;Q9Y383-2;Q9Y383-3	Putative RNA-binding protein Luc7-like 2	LUC7L2	5
0.037351	NaN	0.0072733				1	9.1	13.481	20285000	20135000	150590	0	0	0	33613000	33119000	494150	NaN	A0A0B4J1U7	A0A0B4J1U7			1
0.7075	0.53415	0.70307				1	5	27.366	13077000	8383900	4693200	34065000	21893000	12173000	31061000	20446000	10616000	NaN	Q16629;C9JAB2;Q16629-4;A0A0B4J1Z1;Q16629-2;Q16629-3	Q16629;C9JAB2;Q16629-4;A0A0B4J1Z1;Q16629-2;Q16629-3	Serine/arginine-rich splicing factor 7	SRSF7	6
0.35188	0.75922	0.62448				1	4.1	34.809	2787900	1979000	808900	7600200	4763700	2836500	2377100	1733500	643640	NaN	A0A0B4J207;P21108;P60891;B1ALA7	A0A0B4J207;P21108;P60891;B1ALA7	Ribose-phosphate pyrophosphokinase 3;Ribose-phosphate pyrophosphokinase 1	PRPS1L1;PRPS1	4
1.1405	1.89	1.5066				1	11.4	14.234	836790	412400	424390	1866900	648730	1218200	1046500	485330	561200	NaN	A0A0B4J220	A0A0B4J220			1
NaN	NaN	NaN				1	9.3	23.15	0	0	0	0	0	0	123360	123360	0	NaN	A0A0B4J231;B9A064;P0CG04;P0DOY2;P0DOY3	A0A0B4J231;B9A064;P0CG04;P0DOY2;P0DOY3	Immunoglobulin lambda-like polypeptide 5;Ig lambda-1 chain C regions	IGLL5;IGLC1	5
0.99662	1.8677	0.92269				1	6.3	88.381	31158000	15485000	15673000	28765000	13921000	14843000	34086000	20989000	13097000	NaN	A0A0B4J269;Q13509;Q13509-2	A0A0B4J269;Q13509;Q13509-2	Tubulin beta-3 chain	TUBB3	3
1.0209	0.85275	0.92359				1	5	17.911	15964000	8645600	7317900	20549000	10766000	9782800	19783000	11227000	8555700	NaN	Q15370-2;I3L0M9;Q15370;B8ZZU8;A0A0B4J296	Q15370-2;I3L0M9;Q15370;B8ZZU8;A0A0B4J296	Transcription elongation factor B polypeptide 2	TCEB2	5
0.85623	NaN	0.77883				3	10.8	41.924	5646200	3406700	2239500	0	0	0	21457000	14553000	6903400	NaN	P42765;A0A0B4J2A4;K7EME0	P42765;A0A0B4J2A4	3-ketoacyl-CoA thiolase, mitochondrial	ACAA2	3
1.2022	1.5555	1.2846				2	8.6	17.723	18134000	9161200	8972600	17104000	6619000	10485000	20596000	9952100	10644000	NaN	K7ELC2;P62841;K7EQJ5;S4R417;K7EJ78;A0A0B4J2B4;K7EM56;S4R456	K7ELC2;P62841;K7EQJ5;S4R417;K7EJ78;A0A0B4J2B4;K7EM56;S4R456	40S ribosomal protein S15	RPS15	8
1.0242	0.8976	0.76968				1	3.6	22.574	172890	109860	63028	227050	124500	102550	337280	208800	128480	NaN	A0A0B4J2C3;Q5W0H4;P13693;E9PJF7;J3KPG2;Q9HAU6;P13693-2	A0A0B4J2C3;Q5W0H4;P13693;E9PJF7;J3KPG2;Q9HAU6;P13693-2	Translationally-controlled tumor protein;Putative apoptosis inhibitor FKSG2	TPT1;FKSG2	7
0.49039	0.62321	NaN				2	10.4	24.75	1588700	1124800	463960	4159100	2635500	1523600	0	0	0	NaN	A0A0C4DFU2;P04179;F5GYZ5;A0A0C4DFU1;F5H4R2;P04179-2;P04179-4;F5H3C5;G8JLJ2;A0A0C4DG56;P04179-3;F5GXZ9;G5E9P6	A0A0C4DFU2;P04179;F5GYZ5;A0A0C4DFU1;F5H4R2;P04179-2;P04179-4;F5H3C5;G8JLJ2;A0A0C4DG56;P04179-3;F5GXZ9;G5E9P6	Superoxide dismutase [Mn], mitochondrial	SOD2	13
1.0931	1.0538	1.2058				2	5.3	33.313	23689000	12849000	10841000	31962000	16004000	15958000	29563000	16409000	13154000	NaN	A0A0C4DG17;P08865;C9J9K3;F8WD59	A0A0C4DG17;P08865;C9J9K3;F8WD59	40S ribosomal protein SA	RPSA	4
0.82069	0.88075	0.83965				1	0.1	1011.1	26684000	15997000	10687000	36079000	19855000	16224000	42705000	25701000	17004000	NaN	Q8NF91;A0A0C4DG40;Q8NF91-4;E7ENN3;Q8NF91-2;Q8NF91-8	Q8NF91;A0A0C4DG40;Q8NF91-4;E7ENN3;Q8NF91-2;Q8NF91-8	Nesprin-1	SYNE1	6
0.34263	3.7645	NaN				4	5.2	80.998	838840	613350	225490	9271500	1402100	7869500	0	0	0	NaN	A0A0C4DGB5;P20810-6;P20810-7;P20810-10;P20810-5;P20810-9;P20810;P20810-2;B7Z574;E7EVY3;P20810-8;E9PCH5;P20810-4;E7ES10;E9PDE4;P20810-3;H0Y9H6;H0YD33;H0Y7F0;E7EQA0;A0A0A0MR45;E7EQ12;E7EN75;D6RBR1;D6RGF7	A0A0C4DGB5;P20810-6;P20810-7;P20810-10;P20810-5;P20810-9;P20810;P20810-2;B7Z574;E7EVY3;P20810-8;E9PCH5;P20810-4;E7ES10;E9PDE4;P20810-3;H0Y9H6;H0YD33;H0Y7F0;E7EQA0;A0A0A0MR45;E7EQ12	Calpastatin	CAST	25
NaN	NaN	NaN			+	1	3.1	69.366	0	0	0	0	0	0	0	0	0	NaN	CON__P02768-1;P02768;A0A0C4DGB6;B7WNR0;D6RHD5;H0YA55;C9JKR2;P02768-2	CON__P02768-1;P02768;A0A0C4DGB6;B7WNR0;D6RHD5;H0YA55;C9JKR2;P02768-2	Serum albumin	ALB	8
1.622	0.79668	1.0194				1	0.9	220.85	123480	63449	60033	1220200	606180	614030	377700	242670	135030	NaN	Q14839-2;A0A0C4DGG9;Q14839;F5GWX5;F5H6N4	Q14839-2;A0A0C4DGG9;Q14839;F5GWX5;F5H6N4	Chromodomain-helicase-DNA-binding protein 4	CHD4	5
1.4085	1.3298	1.4446				4	12.3	35.554	23206000	11334000	11873000	82397000	31228000	51169000	60329000	29117000	31212000	NaN	P27695;G3V3M6;G3V5Q1;G3V3C7;A0A0C4DGK8;G3V5D9;G3V359;G3V5M0;G3V3Y6	P27695;G3V3M6;G3V5Q1;G3V3C7;A0A0C4DGK8;G3V5D9;G3V359;G3V5M0;G3V3Y6	DNA-(apurinic or apyrimidinic site) lyase;DNA-(apurinic or apyrimidinic site) lyase, mitochondrial	APEX1	9
NaN	NaN	NaN				1	0.6	212.69	0	0	0	0	0	0	0	0	0	NaN	Q96QT4;H0YLN8;A0A0C4DGL2	Q96QT4;H0YLN8;A0A0C4DGL2	Transient receptor potential cation channel subfamily M member 7	TRPM7	3
NaN	NaN	NaN				1	2.4	50.8	0	0	0	0	0	0	0	0	0	NaN	P39656;A0A0C4DGS1;P39656-3;P39656-2	P39656;A0A0C4DGS1;P39656-3;P39656-2	Dolichyl-diphosphooligosaccharide--protein glycosyltransferase 48 kDa subunit	DDOST	4
1.1113	0.77035	0.7942				1	1.4	98.502	576370	385180	191190	3215000	1721400	1493700	3848100	2417500	1430600	NaN	Q9H4G0;A0A0C4DH22;Q4VXN5;Q4VXN6;Q4VXN7;Q4VXN8	Q9H4G0;A0A0C4DH22;Q4VXN5;Q4VXN6;Q4VXN7;Q4VXN8	Band 4.1-like protein 1	EPB41L1	6
0.76558	NaN	0.72397				2	7.1	36.263	1196700	752770	443920	0	0	0	7102400	4195100	2907300	NaN	Q13642;Q13642-4;Q13642-5;Q13642-1;Q5JXI8;Q5JXI2;Q5JXI3;Q5JXH7;Q5JXH8;Q13642-3;A0A0D9SFZ9;Q5JXH9;A0A0D9SFB0;A0A0D9SFI6;Q5JXI0;A0A0D9SGB2;A0A0D9SG53	Q13642;Q13642-4;Q13642-5;Q13642-1;Q5JXI8;Q5JXI2;Q5JXI3;Q5JXH7;Q5JXH8;Q13642-3;A0A0D9SFZ9;Q5JXH9;A0A0D9SFB0;A0A0D9SFI6;Q5JXI0;A0A0D9SGB2;A0A0D9SG53	Four and a half LIM domains protein 1	FHL1	17
1.1915	1.245	1.3041				6	16.2	70.108	87703000	46299000	41404000	60799000	28517000	32283000	232680000	121290000	111390000	NaN	A0A0G2JIW1;P0DMV8;P0DMV9;P0DMV8-2;P34931;Q53FA3;V9GZ37	A0A0G2JIW1;P0DMV8;P0DMV9;P0DMV8-2;P34931;Q53FA3;V9GZ37	Heat shock 70 kDa protein 1-like	HSPA1L	7
NaN	1.1174	0.6665				2	5.9	50.679	0	0	0	7465100	4552700	2912400	72991000	50769000	22222000	NaN	Q13838-2;Q13838;O00148;A0A0G2JJZ9;H0Y400;Q5STU3;A0A140T9X3;O00148-2;F6WLT2;A0A140TA18;F6UJC5;A0A140T996;A0A140T9X9;H0YCC6	Q13838-2;Q13838;O00148;A0A0G2JJZ9;H0Y400;Q5STU3;A0A140T9X3;O00148-2;F6WLT2;A0A140TA18;F6UJC5;A0A140T996;A0A140T9X9;H0YCC6	Spliceosome RNA helicase DDX39B;ATP-dependent RNA helicase DDX39A	DDX39B;DDX39A;BAT1	14
NaN	NaN	NaN				1	6.3	34.317	0	0	0	0	0	0	0	0	0	NaN	E7EQB3;Q9BSV6;A0A0G2JNK5;A9C4B9;B0V3J0	E7EQB3;Q9BSV6;A0A0G2JNK5;A9C4B9;B0V3J0	tRNA-splicing endonuclease subunit Sen34	TSEN34	5
NaN	NaN	NaN				1	1.2	114.76	0	0	0	0	0	0	0	0	0	NaN	Q9H2U1;Q9H2U1-2;Q9H2U1-3;E7EWK3;A0A0G2JQU7;A0A0G2JRP3	Q9H2U1;Q9H2U1-2;Q9H2U1-3;E7EWK3;A0A0G2JQU7;A0A0G2JRP3	Probable ATP-dependent RNA helicase DHX36	DHX36	6
NaN	NaN	NaN				1	2	45.05	0	0	0	0	0	0	0	0	0	NaN	G5E975;Q12824;Q12824-2;B5MCL5;A0A0G2JSE9;C9JTA6	G5E975;Q12824;Q12824-2;B5MCL5;A0A0G2JSE9;C9JTA6	SWI/SNF-related matrix-associated actin-dependent regulator of chromatin subfamily B member 1	SMARCB1	6
1.1054	1.1335	1.3488				2	8.4	59.875	14192000	6794600	7397100	11036000	4821200	6215000	30051000	16658000	13392000	NaN	Q9UHX1;A0A0J9YXX5;Q9UHX1-2;A0A0J9YVP6;Q9UHX1-5;A0A0J9YXJ8;Q9UHX1-3;Q9UHX1-6;A0A0J9YYL3;Q9UHX1-4;H0YEM1;A0A0J9YWM1;E9PQ56;A0A0J9YVR6;H0YCP8;E9PN18;E9PMU7;E9PL19	Q9UHX1;A0A0J9YXX5;Q9UHX1-2;A0A0J9YVP6;Q9UHX1-5;A0A0J9YXJ8;Q9UHX1-3;Q9UHX1-6;A0A0J9YYL3;Q9UHX1-4;H0YEM1;A0A0J9YWM1;E9PQ56;A0A0J9YVR6;H0YCP8;E9PN18;E9PMU7;E9PL19	Poly(U)-binding-splicing factor PUF60	PUF60	18
1.862	NaN	1.8154				1	3.5	50.519	294050	120130	173920	0	0	0	415960	187100	228860	NaN	Q9HD26;Q9HD26-2;F5H1Y4;Q9HD26-3;A0A0J9YVX5	Q9HD26;Q9HD26-2;F5H1Y4;Q9HD26-3;A0A0J9YVX5	Golgi-associated PDZ and coiled-coil motif-containing protein	GOPC	5
0.89712	0.80412	0.81564				1	6.3	19.889	3361300	2098100	1263200	4629000	2807100	1821900	3564700	2383600	1181100	NaN	Q9Y5S9;Q9Y5S9-2;A0A0J9YW13	Q9Y5S9;Q9Y5S9-2;A0A0J9YW13	RNA-binding protein 8A	RBM8A	3
NaN	NaN	NaN				1	0.8	238.1	0	0	0	0	0	0	0	0	0	NaN	A6NIW2;Q5JSL3;A0A0J9YW64	A6NIW2;Q5JSL3;A0A0J9YW64	Dedicator of cytokinesis protein 11	DOCK11	3
0.96944	1.0216	0.96015				8	4.4	273.42	8560500	5682800	2877700	59945000	32016000	27930000	55202000	35643000	19559000	NaN	P49327;A0A0U1RQF0;A0A0U1RRG3;A0A1B0GTR5	P49327;A0A0U1RQF0	Fatty acid synthase;[Acyl-carrier-protein] S-acetyltransferase;[Acyl-carrier-protein] S-malonyltransferase;3-oxoacyl-[acyl-carrier-protein] synthase;3-oxoacyl-[acyl-carrier-protein] reductase;3-hydroxypalmitoyl-[acyl-carrier-protein] dehydratase;Enoyl-[acyl-carrier-protein] reductase;Oleoyl-[acyl-carrier-protein] hydrolase	FASN	4
0.5821	1.427	1.0099				1	0.2	433.71	7440700	4292600	3148100	4064000	1648800	2415100	7148100	4034900	3113200	NaN	Q01484;I6L894;Q01484-2;Q01484-5;E9PHW9;A0A0U1RQN6;B7Z651;Q9Y4W6	Q01484;I6L894;Q01484-2;Q01484-5;E9PHW9;A0A0U1RQN6;B7Z651;Q9Y4W6	Ankyrin-2;AFG3-like protein 2	ANK2;AFG3L2	8
NaN	0.83722	0.94436				1	1.9	87.798	0	0	0	5377400	2614100	2763300	9620000	4102800	5517200	NaN	P47897;P47897-2;A0A1B0GVU9;B4DDN1;H7C0R3;A0A0U1RQX5;A0A0U1RRC8	P47897;P47897-2;A0A1B0GVU9;B4DDN1;H7C0R3;A0A0U1RQX5;A0A0U1RRC8	Glutamine--tRNA ligase	QARS	7
0.75288	0.90536	0.84385				3	9.4	62.463	67218000	42839000	24379000	97877000	53598000	44280000	46516000	29129000	17387000	NaN	A0A0U1RRM4;P26599-3;P26599-2;P26599;A6NLN1;K7EKJ7;O95758-4;O95758-5;O95758;O95758-2;O95758-6;O95758-1;K7EK45;A0A087WU68;A0A0D9SF20;X6R242;K7ES59;K7ELW5	A0A0U1RRM4;P26599-3;P26599-2;P26599;A6NLN1;K7EKJ7	Polypyrimidine tract-binding protein 1	PTBP1	18
0.9725	0.97015	0.95597				1	2.7	87.399	5940200	3514600	2425600	6094400	2326100	3768400	7886200	4637600	3248600	NaN	A0A0U1RRM6;Q8N8S7;Q8N8S7-2;Q8N8S7-3	A0A0U1RRM6;Q8N8S7;Q8N8S7-2;Q8N8S7-3	Protein enabled homolog	ENAH	4
NaN	NaN	NaN				1	2.1	79.635	0	0	0	0	0	0	0	0	0	NaN	H0Y4Z8;Q3YEC7-2;Q3YEC7;A0A0X1KG72;G3V154	H0Y4Z8;Q3YEC7-2;Q3YEC7;A0A0X1KG72;G3V154	Rab-like protein 1	C9orf86;PARF	5
0.66736	1.0433	0.76729				2	1.8	140.47	1149700	676270	473430	1540600	752870	787700	25475000	15045000	10430000	NaN	P26640;A0A140T936;A0A140T954	P26640;A0A140T936;A0A140T954	Valine--tRNA ligase	VARS	3
NaN	NaN	NaN				1	3.5	47.355	0	0	0	0	0	0	0	0	0	NaN	O75955;O75955-2;A0A140T9R1;A0A140T9W4;A0A140T974	O75955;O75955-2;A0A140T9R1;A0A140T9W4;A0A140T974	Flotillin-1	FLOT1	5
0.73717	2.2792	0.74988				4	9.6	60.032	17370000	11098000	6272200	191290000	21379000	169910000	25265000	16163000	9101800	NaN	A0A1B0GW77;A0A1B0GW82;P49419;A0A1B0GTG2;A0A1B0GUA1;P49419-2;A0A140T9V3;A0A1B0GTJ4;A0A1B0GTY9;P49419-4;A0A1B0GV49;A0A1B0GUY0;A0A0J9YWF7;A0A1B0GVU0;H0YHM6;F8VVF2	A0A1B0GW77;A0A1B0GW82;P49419;A0A1B0GTG2;A0A1B0GUA1;P49419-2;A0A140T9V3;A0A1B0GTJ4;A0A1B0GTY9;P49419-4;A0A1B0GV49;A0A1B0GUY0;A0A0J9YWF7;A0A1B0GVU0	Alpha-aminoadipic semialdehyde dehydrogenase	ALDH7A1	16
NaN	NaN	NaN				1	2.1	53.651	0	0	0	0	0	0	0	0	0	NaN	P08670;B0YJC4;A0A1B0GUA0;A0A1B0GTT5	P08670;B0YJC4;A0A1B0GUA0;A0A1B0GTT5	Vimentin	VIM	4
1.0082	0.95472	0.90458				1	1.2	89.512	40914000	25262000	15652000	30474000	16093000	14382000	63582000	38610000	24972000	NaN	A0A1B0GUI2;O75152;A0A1B0GTU1	A0A1B0GUI2;O75152;A0A1B0GTU1	Zinc finger CCCH domain-containing protein 11A	ZC3H11A	3
2.1357	2.2506	2.33				3	6.5	62.701	94246000	37763000	56483000	165170000	54901000	110270000	248520000	99904000	148610000	NaN	A0A1B0GU03;A0A1B0GU92;P07339;A0A1B0GWE8;A0A1B0GVD5;A0A1B0GV23;A0A1B0GW44;A0A1B0GVP3;H7C469;H7C1V0;C9JH19;F8WD96;F8W787	A0A1B0GU03;A0A1B0GU92;P07339;A0A1B0GWE8;A0A1B0GVD5;A0A1B0GV23;A0A1B0GW44;A0A1B0GVP3;H7C469;H7C1V0	Cathepsin D;Cathepsin D light chain;Cathepsin D heavy chain	CTSD	13
NaN	0.48546	NaN				1	0.4	247.56	0	0	0	588780	432430	156350	0	0	0	NaN	Q01668-2;Q01668;A0A1B0GUN6;Q01668-3;A0A1B0GUB6;Q01668-4	Q01668-2;Q01668;A0A1B0GUN6;Q01668-3;A0A1B0GUB6;Q01668-4	Voltage-dependent L-type calcium channel subunit alpha-1D	CACNA1D	6
0.54615	0.54239	0.32582				2	5.6	42.331	12870000	9794000	3075600	10499000	7376200	3122800	16011000	11571000	4439200	NaN	P38159;Q96E39;P38159-2;H3BT71;H0Y6E7;P38159-3;A0A1B0GUK8;H3BR27;H3BNC1;O75526	P38159;Q96E39;P38159-2;H3BT71;H0Y6E7;P38159-3;A0A1B0GUK8;H3BR27;H3BNC1;O75526	RNA-binding motif protein, X chromosome;RNA-binding motif protein, X chromosome, N-terminally processed;RNA binding motif protein, X-linked-like-1;RNA binding motif protein, X-linked-like-1, N-terminally processed;RNA-binding motif protein, X-linked-like-2	RBMX;RBMXL1;RBMXL2	10
0.89256	0.92061	0.89184				1	4.2	24.003	8994400	4886800	4107600	7188100	3766800	3421200	27423000	17034000	10389000	NaN	P68036-3;A0A1B0GUS4;P68036;P68036-2	P68036-3;A0A1B0GUS4;P68036;P68036-2	Ubiquitin-conjugating enzyme E2 L3	UBE2L3	4
0.58242	1.1885	1.2601				1	2.7	42.293	19511000	12310000	7201000	11253000	5952900	5300300	9830600	5347000	4483600	NaN	P42025;P61163;R4GMT0;A0A1B0GVS3	P42025;P61163;R4GMT0;A0A1B0GVS3	Beta-centractin;Alpha-centractin	ACTR1B;ACTR1A	4
0.94911	0.99451	0.84414				1	3.1	45.671	41315000	24502000	16813000	8299100	4113200	4185900	2954100	1940400	1013600	NaN	P52597;A0A1B0GW42	P52597;A0A1B0GW42	Heterogeneous nuclear ribonucleoprotein F;Heterogeneous nuclear ribonucleoprotein F, N-terminally processed	HNRNPF	2
1.204	NaN	1.1188				1	5	27.872	1306800	724630	582140	0	0	0	2254500	1113800	1140600	NaN	P0DN76;Q01081;Q01081-2;Q8WU68;Q8WU68-2;Q8WU68-3;M0R2N4;Q01081-3;M0QYK5;K7EJM7;A0A1B0GW87;K7EJH3	P0DN76;Q01081;Q01081-2;Q8WU68;Q8WU68-2;Q8WU68-3;M0R2N4;Q01081-3;M0QYK5;K7EJM7;A0A1B0GW87;K7EJH3	Splicing factor U2AF 35 kDa subunit;Splicing factor U2AF 26 kDa subunit	U2AF1;U2AF1L4	12
1.8733	1.7469	NaN				1	1.4	72.911	2183000	937520	1245500	2954300	1055800	1898400	0	0	0	NaN	O00116;A0A1B0GWA2	O00116;A0A1B0GWA2	Alkyldihydroxyacetonephosphate synthase, peroxisomal	AGPS	2
0.54045	0.6746	0.93019				1	4.7	49.96	16501000	10108000	6393400	15844000	9251000	6593500	20421000	12161000	8260400	NaN	Q9Y6N5;H3BNX3;H3BMS6;H3BV36;A0A1B0GXB4	Q9Y6N5;H3BNX3;H3BMS6;H3BV36;A0A1B0GXB4	Sulfide:quinone oxidoreductase, mitochondrial	SQRDL	5
1.1361	1.0516	1.0888				3	12.7	34.759	15546000	8335900	7209900	11944000	5972700	5971800	12992000	6888900	6103400	NaN	Q9H098-2;Q9H098;A0A1C7CYX8;C9JW51;C9JQ40;C9J6N5;C9J3Q3;C9JP05;X6RET8;C9J6Y8;C9JYP1;F8WCJ2	Q9H098-2;Q9H098;A0A1C7CYX8;C9JW51;C9JQ40;C9J6N5;C9J3Q3	Protein FAM107B	FAM107B	12
NaN	1.1166	1.0119				1	2.3	74.261	0	0	0	12302000	5325700	6976600	16512000	9288100	7223700	NaN	Q14194-2;Q14195-2;A0A1C7CYX9;Q14194;Q16555;E9PD68;Q14195;Q16555-2;H0YBT4	Q14194-2;Q14195-2;A0A1C7CYX9;Q14194;Q16555;E9PD68;Q14195;Q16555-2;H0YBT4	Dihydropyrimidinase-related protein 1;Dihydropyrimidinase-related protein 2;Dihydropyrimidinase-related protein 3	CRMP1;DPYSL2;DPYSL3	9
1.0817	NaN	1.1856				1	3.4	64.098	556250	285840	270410	0	0	0	1129400	546680	582670	NaN	A0AV96;A0AV96-2;D6R9D6;D6RBS9;D6REZ6;D6R9M7;D6RFL5;D6RA49;D6RBP6;D6RCT1	A0AV96;A0AV96-2;D6R9D6;D6RBS9;D6REZ6;D6R9M7;D6RFL5;D6RA49;D6RBP6;D6RCT1	RNA-binding protein 47	RBM47	10
1.1229	NaN	1.1693				1	2.8	52.748	16894000	11144000	5750300	0	0	0	28854000	15640000	13214000	NaN	D6REA1;Q9H173;A0RZB6	D6REA1;Q9H173;A0RZB6	Nucleotide exchange factor SIL1	SIL1	3
0.8999	0.83186	0.48845				3	5.3	87.819	16421000	9639400	6781300	3678800	1960000	1718700	5892300	4484000	1408400	NaN	A2A274;Q99798	A2A274;Q99798	Aconitate hydratase, mitochondrial	ACO2	2
1.8099	1.166	1.5089				1	1.4	92.501	22311000	11881000	10430000	76000000	33212000	42787000	34212000	16789000	17423000	NaN	Q5SZL2-4;Q5SZL2;A2A3P3	Q5SZL2-4;Q5SZL2;A2A3P3	Centrosomal protein of 85 kDa-like	CEP85L;C6orf204	3
1.3343	1.3653	1.4694				1	11.5	24.968	8230000	4270500	3959500	56588000	25575000	31014000	24095000	12366000	11729000	NaN	A2A3R5	A2A3R5	40S ribosomal protein S6	RPS6	1
NaN	NaN	0.87844				1	4.1	28.218	0	0	0	0	0	0	1626600	970260	656370	NaN	Q04917;A2IDB2	Q04917;A2IDB2	14-3-3 protein eta	YWHAH	2
NaN	NaN	1.2213				1	2.7	30.156	0	0	0	0	0	0	1025800	511010	514830	NaN	Q13084;A2IDC6;Q4TT37;A2IDC7	Q13084;A2IDC6;Q4TT37;A2IDC7	39S ribosomal protein L28, mitochondrial	MRPL28	4
1.2894	NaN	1.3234				1	3.9	40.578	282230	157560	124680	0	0	0	326140	170280	155860	NaN	Q96EI5-2;Q96EI5;A2RQR6;D6RD44;D6RCE9;D6RIH3;D6RHZ1;J3KQY4	Q96EI5-2;Q96EI5;A2RQR6;D6RD44;D6RCE9;D6RIH3;D6RHZ1;J3KQY4	Transcription elongation factor A protein-like 4	TCEAL4	8
NaN	NaN	NaN				1	1.8	120.87	0	0	0	0	0	0	0	0	0	NaN	A2RUF3;O75044;B7ZM87	A2RUF3;O75044;B7ZM87	SLIT-ROBO Rho GTPase-activating protein 2	SRGAP2	3
NaN	NaN	NaN				1	0.7	266.94	0	0	0	0	0	0	0	0	0	NaN	A5YKK6;A5YKK6-2;A5YKK6-3;A5YKK6-4;H3BVC9	A5YKK6;A5YKK6-2;A5YKK6-3;A5YKK6-4;H3BVC9	CCR4-NOT transcription complex subunit 1	CNOT1	5
NaN	0.94376	NaN				2	1.5	213.47	0	0	0	1026200	595060	431150	0	0	0	NaN	A6NEM2;P51610-4;P51610;P51610-2;H7C1C4	A6NEM2;P51610-4;P51610;P51610-2;H7C1C4	Host cell factor 1;HCF N-terminal chain 1;HCF N-terminal chain 2;HCF N-terminal chain 3;HCF N-terminal chain 4;HCF N-terminal chain 5;HCF N-terminal chain 6;HCF C-terminal chain 1;HCF C-terminal chain 2;HCF C-terminal chain 3;HCF C-terminal chain 4;HCF C-terminal chain 5;HCF C-terminal chain 6	HCFC1	5
0.68752	1.0489	0.88914				2	11.6	25.895	576140	393650	182490	46957000	24141000	22815000	20658000	10109000	10549000	NaN	A6NFX8;Q9UKK9;A6NJU6;A6NCQ0;C9JYY9	A6NFX8;Q9UKK9;A6NJU6;A6NCQ0;C9JYY9	ADP-sugar pyrophosphatase	NUDT5	5
0.91305	0.49033	0.91464				1	2.7	41.943	6295700	3936300	2359400	7023300	3573400	3449800	9366100	5467500	3898700	NaN	Q9H7Z7;X6RJ95;A6NHH0	Q9H7Z7;X6RJ95;A6NHH0	Prostaglandin E synthase 2;Prostaglandin E synthase 2 truncated form	PTGES2	3
1.1896	1.1144	1.2311				1	6.9	16.442	10827000	5709300	5117800	7893500	3902500	3991000	5623400	3019400	2604000	NaN	O14602;P47813;A6NJH9;X6RAC9	O14602;P47813;A6NJH9;X6RAC9	Eukaryotic translation initiation factor 1A, Y-chromosomal;Eukaryotic translation initiation factor 1A, X-chromosomal	EIF1AY;EIF1AX	4
1.1813	1.0009	NaN				2	18.2	20.994	293010	156020	136980	12158000	6432400	5725500	0	0	0	NaN	Q5T5H1;A6NMQ3;O43768-4;O43768-3;O43768-9;O43768;O43768-2;O43768-8;O43768-7;H3BMD8;O43768-5;O43768-6;P56211-2;H3BTD3;H3BQ52	Q5T5H1;A6NMQ3;O43768-4;O43768-3;O43768-9;O43768;O43768-2;O43768-8	Alpha-endosulfine	ENSA	15
0.95236	0.95717	0.9555				10	30	40.411	2092400000	1189800000	902640000	2578400000	1332900000	1245400000	3257600000	1850400000	1407100000	NaN	P07355-2;A6NMY6;P07355;H0YN42;H0YMU9;H0YMD0;H0YKS4;H0YM50;H0YNP5;H0YMM1;H0YMW4;H0YL33;H0YN28;H0YKX9;H0YMT9;H0YLV6;H0YKZ7;H0YKL9;H0YNA0;H0YN52;H0YKV8;H0YKN4;H0YMD9;H0YNB8	P07355-2;A6NMY6;P07355;H0YN42;H0YMU9;H0YMD0;H0YKS4;H0YM50;H0YNP5	Putative annexin A2-like protein;Annexin A2;Annexin	ANXA2P2;ANXA2	24
0.69613	0.6744	1.1544				2	9.6	25.407	4068000	2853900	1214100	8657900	5666300	2991600	8934300	5910200	3024100	NaN	G8JLH6;P21926;A6NNI4;A0A087WU13;F5GXT1	G8JLH6;P21926;A6NNI4;A0A087WU13;F5GXT1	CD9 antigen	CD9	5
NaN	NaN	NaN				1	3.6	40.667	0	0	0	0	0	0	0	0	0	NaN	Q15257;A6PVN5;Q15257-2;Q15257-3;F6WIT2;Q15257-4;Q68CR8;B7ZBQ0	Q15257;A6PVN5;Q15257-2;Q15257-3;F6WIT2;Q15257-4;Q68CR8;B7ZBQ0	Serine/threonine-protein phosphatase 2A activator	PPP2R4;DKFZp781M17165	8
0.98337	1.0785	1.3403				1	18.3	45.338	343330000	179120000	164200000	267930000	133200000	134730000	476140000	235130000	241010000	NaN	A8K7Q2;E9PS65;E9PM13;P17066	A8K7Q2;E9PS65		HSPA8	4
NaN	NaN	NaN				1	5.9	21.143	0	0	0	0	0	0	0	0	0	NaN	A8K878;P55145	A8K878;P55145	Mesencephalic astrocyte-derived neurotrophic factor	MANF	2
1.276	1.2417	1.2263				7	20.6	21.916	145830000	71631000	74196000	213640000	90733000	122910000	168280000	87920000	80358000	NaN	A8MUS3;K7ERT8;K7EJV9;H7BY10;P62750;K7EMA7	A8MUS3;K7ERT8;K7EJV9;H7BY10;P62750;K7EMA7	60S ribosomal protein L23a	RPL23A	6
1.1897	1.4197	1.0991				2	6.7	43.727	4900800	2526100	2374800	5686000	2396900	3289000	976630	476790	499840	NaN	Q9NQ29;Q9NQ29-3;Q9NQ29-2;A8MYV2;B8ZZ10;B8ZZ09	Q9NQ29;Q9NQ29-3;Q9NQ29-2;A8MYV2;B8ZZ10;B8ZZ09	Putative RNA-binding protein Luc7-like 1	LUC7L	6
NaN	NaN	NaN				1	1.8	77.82	500770	0	500770	0	0	0	0	0	0	NaN	A9YTQ3-3;E5RFG4;G3V143;E5RGQ2	A9YTQ3-3;E5RFG4;G3V143;E5RGQ2		AHRR	4
0.9225	0.98271	0.84304				2	3.2	103.39	4093600	2653900	1439700	12299000	6388700	5910100	17505000	11676000	5829300	NaN	A9Z1X7;Q8IYB3;Q8IYB3-2;E9PCT1;M0R088;M0QXG5;M0R1E7	A9Z1X7;Q8IYB3;Q8IYB3-2;E9PCT1;M0R088;M0QXG5;M0R1E7	Serine/arginine repetitive matrix protein 1	SRRM1	7
NaN	NaN	NaN				1	2.2	63.972	0	0	0	0	0	0	0	0	0	NaN	O15371;O15371-3;O15371-2;B0QYA5;B0QYA6;B0QYA8	O15371;O15371-3;O15371-2;B0QYA5;B0QYA6;B0QYA8	Eukaryotic translation initiation factor 3 subunit D	EIF3D	6
NaN	NaN	NaN				1	3.8	40.241	0	0	0	0	0	0	0	0	0	NaN	Q14320;B0S8I6	Q14320;B0S8I6	Protein FAM50A	FAM50A	2
0.81816	1.0213	0.79878				4	9.2	61.626	18309000	11515000	6794400	10655000	5202500	5452300	4995900	3208000	1788000	NaN	B0YIW6;P48444;P48444-2	B0YIW6;P48444;P48444-2	Coatomer subunit delta	ARCN1	3
NaN	NaN	NaN				1	3.5	26.859	0	0	0	0	0	0	0	0	0	NaN	B0YJC5	B0YJC5		VIM	1
NaN	1.3781	1.4142				1	6.2	32.818	0	0	0	4080500	1509900	2570600	7340500	3031500	4309000	NaN	P09601;B1AHA8	P09601;B1AHA8	Heme oxygenase 1	HMOX1	2
0.86484	0.84315	0.86146				1	3.5	24.428	4560200	2789300	1770800	3899200	2117800	1781400	8198200	5031700	3166600	NaN	O75832;B1AJY7;B1AJY5	O75832;B1AJY7;B1AJY5	26S proteasome non-ATPase regulatory subunit 10	PSMD10	3
2.2453	NaN	NaN				1	0.7	139.41	1587000	543460	1043600	0	0	0	0	0	0	NaN	B1AKJ5;O43847-2;O43847;G3V1R5;H0Y5G9	B1AKJ5;O43847-2;O43847;G3V1R5;H0Y5G9	Nardilysin	NRD1	5
NaN	1.043	NaN				1	4.2	28.675	0	0	0	4643000	2784700	1858300	0	0	0	NaN	Q8N983-7;Q8N983-6;Q8N983;Q8N983-2;B1AL05;H0Y6Y8;Q8N983-3;Q8N983-4;H0YBU8	Q8N983-7;Q8N983-6;Q8N983;Q8N983-2;B1AL05;H0Y6Y8;Q8N983-3;Q8N983-4;H0YBU8	39S ribosomal protein L43, mitochondrial	MRPL43	9
1.2252	1.1506	1.3083				1	1.1	112.03	28417000	15586000	12831000	15126000	7076800	8049500	22165000	11610000	10555000	NaN	Q16513;Q16513-2;Q16513-3;B1AL79	Q16513;Q16513-2;Q16513-3;B1AL79	Serine/threonine-protein kinase N2	PKN2	4
1.0841	1.1739	0.9327				2	8	72.39	48640000	27878000	20762000	49368000	25384000	23984000	75347000	43958000	31388000	NaN	Q13310-3;Q13310;Q13310-2;B1ANR0;H0Y5F5;E7ERJ7;H0YAR2;H0YEU6;Q9H361;H0YCC8;H0YB86;B1ANR1;H0YEQ8	Q13310-3;Q13310;Q13310-2;B1ANR0;H0Y5F5;E7ERJ7;H0YAR2;H0YEU6	Polyadenylate-binding protein 4	PABPC4;PABPC1	13
0.9772	1.1156	0.99872				2	6.4	38.449	1597800	887890	709900	4996100	2278100	2718000	1291900	726470	565450	NaN	Q9UBE0;B3KNJ4;Q9UBE0-3;Q9UBE0-2;M0QX65;M0R054;M0QYM8	Q9UBE0;B3KNJ4;Q9UBE0-3;Q9UBE0-2;M0QX65;M0R054;M0QYM8	SUMO-activating enzyme subunit 1	SAE1	7
1.1036	1.0414	1.2205				4	8.3	65.308	26832000	15035000	11797000	19998000	10484000	9514600	49837000	23445000	26392000	NaN	P30153;B3KQV6;C9J9C1;E9PH38	P30153;B3KQV6;C9J9C1	Serine/threonine-protein phosphatase 2A 65 kDa regulatory subunit A alpha isoform	PPP2R1A	4
NaN	1.2234	NaN				1	2.4	89.022	0	0	0	97592	43872	53720	0	0	0	NaN	Q9UKI8-2;Q9UKI8;Q9UKI8-5;Q9UKI8-4;Q9UKI8-3;B3KRP1	Q9UKI8-2;Q9UKI8;Q9UKI8-5;Q9UKI8-4;Q9UKI8-3;B3KRP1	Serine/threonine-protein kinase tousled-like 1	TLK1	6
0.47431	NaN	NaN				1	2.7	49.967	2180800	1561100	619720	0	0	0	0	0	0	NaN	M0QXF9;M0QZ10;O15382;B3KSI3;M0R2K7	M0QXF9;M0QZ10;O15382;B3KSI3;M0R2K7	Branched-chain-amino-acid aminotransferase, mitochondrial;Branched-chain-amino-acid aminotransferase	BCAT2	5
NaN	NaN	NaN				1	3.4	44.408	0	0	0	0	0	0	0	0	0	NaN	P49354;P49354-2;B3KVN2	P49354;P49354-2;B3KVN2	Protein farnesyltransferase/geranylgeranyltransferase type-1 subunit alpha	FNTA	3
NaN	NaN	NaN				1	1.7	68.002	0	0	0	0	0	0	0	0	0	NaN	O00541;O00541-2;B5MCF9;B3KXD6;H7BYY8	O00541;O00541-2;B5MCF9;B3KXD6;H7BYY8	Pescadillo homolog	PES1	5
NaN	NaN	1.013				1	3.3	42.033	0	0	0	0	0	0	4260000	2251200	2008800	NaN	Q9Y2S7;B4DEM9	Q9Y2S7;B4DEM9	Polymerase delta-interacting protein 2	POLDIP2	2
NaN	NaN	1.0155				1	3.2	42.674	0	0	0	0	0	0	7329900	4457600	2872300	NaN	P35659;B4DFG0;P35659-2;D6R9L5;D6RDA2	P35659;B4DFG0;P35659-2;D6R9L5;D6RDA2	Protein DEK	DEK	5
NaN	0.089317	NaN				1	5.9	24.399	0	0	0	133990	128250	5740.4	0	0	0	NaN	P16035;B4DFW2;K7EIX4	P16035;B4DFW2;K7EIX4	Metalloproteinase inhibitor 2	TIMP2	3
NaN	NaN	NaN				1	4.4	32.444	0	0	0	0	0	0	0	0	0	NaN	O00560;O00560-2;E9PBU7;B4DHN5	O00560;O00560-2;E9PBU7;B4DHN5	Syntenin-1	SDCBP	4
0.88875	0.83091	0.83789				4	10.3	51.712	119760000	73441000	46321000	103770000	59660000	44113000	125650000	77887000	47763000	NaN	O75390;B4DJV2;A0A0C4DGI3;F8W4S1;F8VTT8;F8VU34;H0YIC4;F8W031;H0YH82;F8VR34;F8VWQ5;F8VP03;F8W0J2	O75390;B4DJV2;A0A0C4DGI3;F8W4S1;F8VTT8;F8VU34;H0YIC4	Citrate synthase, mitochondrial;Citrate synthase	CS	13
1.097	0.63404	1.1456				1	1.2	94.637	12128000	6374200	5753300	21481000	10555000	10926000	37318000	20629000	16689000	NaN	P49589-3;P49589;B4DKY1;P49589-2	P49589-3;P49589;B4DKY1;P49589-2	Cysteine--tRNA ligase, cytoplasmic	CARS	4
0.98553	1.0089	0.8731				3	5.2	48.099	20674000	11579000	9094300	38698000	19242000	19456000	24179000	14673000	9506100	NaN	B4DLN1;P52815	B4DLN1;P52815	39S ribosomal protein L12, mitochondrial	SLC25A10;MRPL12	2
0.98297	1.0444	1.029				8	22.6	30.867	1475400000	863860000	611510000	1774500000	894500000	880020000	1865100000	1074400000	790760000	NaN	P15559;H3BNV2;P15559-2;P15559-3;B4DLR8;H3BRK3	P15559;H3BNV2;P15559-2;P15559-3;B4DLR8;H3BRK3	NAD(P)H dehydrogenase [quinone] 1	NQO1	6
0.8925	0.73304	0.79713				1	3.5	34.012	24657000	15288000	9369800	13846000	7566700	6279100	22213000	14195000	8018500	NaN	P53007;B4DP62	P53007;B4DP62	Tricarboxylate transport protein, mitochondrial	SLC25A1	2
0.80826	0.78786	NaN				1	4.8	22.345	9475500	5013200	4462300	8220000	4041400	4178600	0	0	0	NaN	Q96IU4;F8W9U3;B4DQI4;Q96IU4-2	Q96IU4;F8W9U3;B4DQI4;Q96IU4-2	Abhydrolase domain-containing protein 14B	ABHD14B	4
1.2123	1.2193	2.3452				2	10.6	24.488	77617000	41343000	36274000	67636000	32368000	35268000	81270000	44983000	36287000	NaN	Q15907;P62491;H3BSC1;Q15907-2;H3BMH2;P62491-2;B4DQU5	Q15907;P62491;H3BSC1;Q15907-2;H3BMH2;P62491-2;B4DQU5	Ras-related protein Rab-11B;Ras-related protein Rab-11A	RAB11B;RAB11A	7
NaN	NaN	NaN				1	3.7	47.913	0	0	0	0	0	0	0	0	0	NaN	Q9Y6E0-2;B4DR80	Q9Y6E0-2;B4DR80		STK24	2
NaN	NaN	NaN				1	3.8	42.668	0	0	0	0	0	0	0	0	0	NaN	B5MDU6;Q9H6V9-2;Q9H6V9;B4DRG3;B5MCE2	B5MDU6;Q9H6V9-2;Q9H6V9;B4DRG3;B5MCE2	UPF0554 protein C2orf43	C2orf43	5
1.0566	NaN	NaN	+			1	1	194.06	13929000	6454100	7474800	0	0	0	0	0	0	NaN	P53804-3;B4DSZ9	P53804-3;B4DSZ9		TTC3	2
0.93755	0.97309	0.89355				1	21	77.038	10601000	5748100	4853100	72562000	39194000	33367000	2409300	1557700	851610	NaN	P0CG48;Q96C32;P0CG47;Q5PY61;J3QKN0;F5GXK7;F5H747;P62979;F5H388;B4DV12;F5H265;F5H2Z3;F5GYU3;P62987;F5H6Q2;J3QTR3;J3QS39;M0R1V7;F5GZ39;J3QSA3	P0CG48;Q96C32;P0CG47;Q5PY61;J3QKN0;F5GXK7;F5H747;P62979;F5H388;B4DV12;F5H265;F5H2Z3;F5GYU3;P62987;F5H6Q2;J3QTR3;J3QS39;M0R1V7;F5GZ39;J3QSA3	Polyubiquitin-C;Ubiquitin;Polyubiquitin-B;Ubiquitin;Ubiquitin-40S ribosomal protein S27a;Ubiquitin;40S ribosomal protein S27a;Ubiquitin-60S ribosomal protein L40;Ubiquitin;60S ribosomal protein L40	UBC;UBB;RPS27A;UBA52	20
NaN	0.82227	0.98459				1	3.6	43.062	0	0	0	10588000	5935500	4652500	17863000	10478000	7384600	NaN	Q12905;B4DY09;X6R6Z1	Q12905;B4DY09;X6R6Z1	Interleukin enhancer-binding factor 2	ILF2	3
1.0686	1.0433	1.0351				2	5.9	21.391	15777000	8175200	7601800	24144000	10743000	13400000	7665200	4192300	3473000	NaN	B5MC07;O95994;C9J3E2;H7C3Z9	B5MC07;O95994;C9J3E2;H7C3Z9	Anterior gradient protein 2 homolog	AGR2	4
NaN	1.4837	NaN				1	2.6	48.162	0	0	0	3595700	1613200	1982500	0	0	0	NaN	Q9Y6E2;E7ETZ4;B5MCH7;B5MCE7	Q9Y6E2;E7ETZ4;B5MCH7;B5MCE7	Basic leucine zipper and W2 domain-containing protein 2	BZW2	4
NaN	NaN	1.1781				1	3.9	60.024	0	0	0	0	0	0	388870	208020	180840	NaN	P22310;P35503;P35504;P22309;P19224;O60656;Q9HAW7;Q9HAW8;Q9HAW9;P22310-2;P35503-3;P35504-2;P22309-2;P19224-3;O60656-2;Q9HAW7-2;Q9HAW8-2;Q9HAW9-2;P19224-2;B5MCT4	P22310;P35503;P35504;P22309;P19224;O60656;Q9HAW7;Q9HAW8;Q9HAW9;P22310-2;P35503-3;P35504-2;P22309-2;P19224-3;O60656-2;Q9HAW7-2;Q9HAW8-2;Q9HAW9-2;P19224-2;B5MCT4	UDP-glucuronosyltransferase 1-4;UDP-glucuronosyltransferase 1-3;UDP-glucuronosyltransferase 1-5;UDP-glucuronosyltransferase 1-1;UDP-glucuronosyltransferase 1-6;UDP-glucuronosyltransferase 1-9;UDP-glucuronosyltransferase 1-7;UDP-glucuronosyltransferase 1-10;UDP-glucuronosyltransferase 1-8	UGT1A4;UGT1A3;UGT1A5;UGT1A1;UGT1A6;UGT1A9;UGT1A7;UGT1A10;UGT1A8	20
1.3746	1.1563	1.5826				3	7.9	46.108	121190000	62264000	58925000	52007000	22544000	29463000	68190000	35133000	33058000	NaN	P39023;G5E9G0;B5MCW2;H7C422;H7C3M2;F8WCR1	P39023;G5E9G0;B5MCW2	60S ribosomal protein L3	RPL3	6
0.91696	0.96027	0.85167				1	4.3	45.46	16154000	10083000	6070300	9672100	5071100	4601000	17829000	11219000	6609900	NaN	Q15019-2;Q15019-3;Q15019;B5MCX3;H7C2Y0	Q15019-2;Q15019-3;Q15019;B5MCX3;H7C2Y0	Septin-2	2017-09-02	5
1.2336	NaN	NaN				1	5.9	21.418	4430900	2259800	2171100	0	0	0	0	0	0	NaN	P83916;J3KS05;B5MD17	P83916;J3KS05;B5MD17	Chromobox protein homolog 1	CBX1	3
1.0014	0.9284	0.86164				3	7.6	51.294	86152000	50528000	35625000	22075000	11421000	10654000	44755000	26807000	17948000	NaN	P55084;F5GZQ3;P55084-2;B5MD38	P55084;F5GZQ3;P55084-2;B5MD38	Trifunctional enzyme subunit beta, mitochondrial;3-ketoacyl-CoA thiolase	HADHB	4
0.98903	0.92825	0.89243				6	22.7	26.224	259600000	153700000	105900000	415190000	222010000	193180000	306230000	187570000	118650000	NaN	B5MDF5;P62826;J3KQE5;F5H018;H0YFC6;B4DV51	B5MDF5;P62826;J3KQE5;F5H018;H0YFC6	GTP-binding nuclear protein Ran	RAN	6
1.3409	1.1947	2.6748				2	1.3	105.47	11502000	5879500	5622700	12087000	5377200	6710000	24287000	11512000	12775000	NaN	B5ME19;Q99613;Q99613-2	B5ME19;Q99613;Q99613-2	Eukaryotic translation initiation factor 3 subunit C	EIF3CL;EIF3C	3
NaN	NaN	0.4457				1	4.5	25.789	0	0	0	0	0	0	15005000	9098300	5907000	NaN	P09417;P09417-2;D6RGG7;B7Z415;H0Y8F7	P09417;P09417-2;D6RGG7;B7Z415;H0Y8F7	Dihydropteridine reductase	QDPR	5
NaN	1.1923	0.87418				1	4.3	33.969	0	0	0	9991500	4501200	5490300	4649600	2595800	2053800	NaN	P23193;P23193-2;B7Z4S1	P23193;P23193-2;B7Z4S1	Transcription elongation factor A protein 1	TCEA1	3
NaN	NaN	NaN				1	10.3	19.874	22379	0	22379	0	0	0	0	0	0	NaN	B7Z509;B8ZZC5	B7Z509;B8ZZC5		GLS	2
2.4343	0.51154	0.92457				1	2.3	49.03	8604700	4089100	4515500	12868000	6725600	6141900	13538000	8334400	5204000	NaN	P62495;B7Z7P8;P62495-2	P62495;B7Z7P8;P62495-2	Eukaryotic peptide chain release factor subunit 1	ETF1	3
1.263	0.98846	1.2015				1	7	32.806	950460	541060	409400	3631300	1718800	1912500	1429600	761440	668130	NaN	P40855;Q5QNY5;B7Z8B3;E9PS71	P40855;Q5QNY5;B7Z8B3;E9PS71	Peroxisomal biogenesis factor 19	PEX19	4
NaN	NaN	1.1771				2	7.4	45.374	0	0	0	0	0	0	4995400	2755700	2239700	NaN	P55209;H0YIV4;F5H4R6;F8W0J6;P55209-2;B7Z9C2;F8W543;F8VV59;P55209-3;F8VY35;F8VUX1;F8VXI6;F8W118;F8W020;H0YHC3;H0YH88	P55209;H0YIV4;F5H4R6;F8W0J6;P55209-2;B7Z9C2;F8W543;F8VV59;P55209-3;F8VY35;F8VUX1;F8VXI6;F8W118;F8W020;H0YHC3;H0YH88	Nucleosome assembly protein 1-like 1	NAP1L1	16
NaN	0.55196	NaN				1	7	12.324	0	0	0	7427800	4624300	2803500	0	0	0	NaN	B7ZB02	B7ZB02			1
NaN	NaN	0.43378				1	1.2	113.08	0	0	0	0	0	0	4558200	3704300	853950	NaN	Q08379;B7ZC06	Q08379;B7ZC06	Golgin subfamily A member 2	GOLGA2	2
NaN	NaN	2.5008				1	11	16.645	0	0	0	0	0	0	6469400	1399500	5069900	NaN	B8ZZN6;P63165;B9A032;B8ZZJ0	B8ZZN6;P63165;B9A032;B8ZZJ0	Small ubiquitin-related modifier 1	SUMO1	4
NaN	NaN	NaN				1	5.4	29.736	0	0	0	0	0	0	1279300	1279300	0	NaN	S4R3N1;P61604;B8ZZL8	S4R3N1;P61604;B8ZZL8	10 kDa heat shock protein, mitochondrial	HSPE1	3
NaN	1.0373	0.95048				2	26.1	12.203	0	0	0	37274000	18867000	18407000	19185000	11331000	7854100	NaN	P06454;P06454-2;B8ZZQ6;H7C2N1;B8ZZW7;B8ZZA1	P06454;P06454-2;B8ZZQ6;H7C2N1;B8ZZW7;B8ZZA1	Prothymosin alpha;Thymosin alpha-1	PTMA	6
0.94648	1.1419	1.0419				1	5.8	21.838	1424300	825470	598800	735780	296360	439420	886940	531850	355090	NaN	Q8TCC3-2;Q8TCC3;Q8TCC3-3;B8ZZV5	Q8TCC3-2;Q8TCC3;Q8TCC3-3;B8ZZV5	39S ribosomal protein L30, mitochondrial	MRPL30	4
0.58865	0.85763	0.73478				4	7.5	83.677	44850000	27920000	16930000	33993000	18889000	15103000	61646000	40966000	20680000	NaN	Q16891;Q16891-4;Q16891-2;Q16891-3;B9A067;C9J406;H7C463	Q16891;Q16891-4;Q16891-2;Q16891-3;B9A067;C9J406;H7C463	Mitochondrial inner membrane protein	IMMT	7
1.106	NaN	1.0493				1	3.8	58.92	1086200	593290	492890	0	0	0	2254200	1258300	995950	NaN	Q92925;Q92925-2;B9EGA3;Q92925-3;J3KMX2	Q92925;Q92925-2;B9EGA3;Q92925-3;J3KMX2	SWI/SNF-related matrix-associated actin-dependent regulator of chromatin subfamily D member 2	SMARCD2	5
NaN	NaN	NaN				1	9.8	13.282	0	0	0	0	0	0	0	0	0	NaN	C9IYP1	C9IYP1		DLG1	1
NaN	0.932	NaN				1	1.9	85.868	0	0	0	2742200	1248100	1494100	0	0	0	NaN	Q96RP9-2;Q96RP9;C9IZ01	Q96RP9-2;Q96RP9;C9IZ01	Elongation factor G, mitochondrial	GFM1	3
NaN	NaN	0.43765				1	1.8	61.728	0	0	0	0	0	0	3031700	2054500	977180	NaN	Q9NUQ6;Q9NUQ6-2;F8W6C2;C9JGM8;F8VT91;F8VZ02;C9JKE4;F2Z2S1;C9J8M7;C9IZC3;F8WAV0;Q4ZFW0	Q9NUQ6;Q9NUQ6-2;F8W6C2;C9JGM8;F8VT91;F8VZ02;C9JKE4;F2Z2S1;C9J8M7;C9IZC3;F8WAV0;Q4ZFW0	SPATS2-like protein	SPATS2L;DKFZP564A2416	12
NaN	NaN	NaN				1	6.1	20.925	0	0	0	0	0	0	0	0	0	NaN	O60888-2;O60888;O60888-3;C9IZG4	O60888-2;O60888;O60888-3;C9IZG4	Protein CutA	CUTA	4
1.1913	1.2105	1.1128				5	20.8	23.489	24711000	13657000	11054000	55373000	25274000	30100000	39857000	22187000	17670000	NaN	P51149;C9J8S3;C9J4V0;C9IZZ0;C9J592;C9J4S4;C9J7D1	P51149;C9J8S3;C9J4V0;C9IZZ0;C9J592;C9J4S4;C9J7D1	Ras-related protein Rab-7a	RAB7A	7
NaN	1.486	1.2367	+			1	46.4	3.0826	0	0	0	591920	230340	361580	428020	282960	145050	NaN	C9J0S2;C9JBJ5	C9J0S2;C9JBJ5		SEC13	2
1.3091	0.90605	0.98789				1	4.7	44.078	9321900	4500900	4821000	5230200	2208100	3022100	7891300	4739500	3151800	NaN	Q99733-2;Q99733;C9JZI7;C9J6D1;E9PKT8;E9PP22;E9PNJ7;E9PS34;E9PJJ2;E9PNW0;C9J1B1;E9PKI2	Q99733-2;Q99733;C9JZI7;C9J6D1;E9PKT8;E9PP22;E9PNJ7;E9PS34;E9PJJ2;E9PNW0;C9J1B1;E9PKI2	Nucleosome assembly protein 1-like 4	NAP1L4	12
NaN	NaN	0.14101				1	2.6	59.179	0	0	0	0	0	0	25543000	20213000	5329200	NaN	Q92783;Q92783-2;C9J1E5	Q92783;Q92783-2;C9J1E5	Signal transducing adapter molecule 1	STAM	3
NaN	NaN	NaN				1	1.1	104.64	0	0	0	0	0	0	0	0	0	NaN	Q10567;Q10567-2;Q10567-3;Q10567-4;C9J1E7	Q10567;Q10567-2;Q10567-3;Q10567-4;C9J1E7	AP-1 complex subunit beta-1	AP1B1	5
1.023	1.0102	0.60225				3	14.9	19.81	9828200	5896600	3931600	23464000	11988000	11476000	14031000	7529300	6501800	NaN	O43324;C9J1V9;D6RBD7;O43324-2;H0YAL7;D6RCQ0	O43324;C9J1V9;D6RBD7;O43324-2;H0YAL7;D6RCQ0	Eukaryotic translation elongation factor 1 epsilon-1	EEF1E1	6
NaN	NaN	0.96087				1	8.3	20.529	0	0	0	0	0	0	1529600	884880	644720	NaN	P84085;C9J1Z8	P84085;C9J1Z8	ADP-ribosylation factor 5	ARF5	2
1.1154	0.64091	1.2219				3	2.2	176.23	4443500	2419900	2023700	8174700	3422500	4752200	13388000	7403900	5983800	NaN	Q04637-9;Q04637-8;Q04637;E7EUU4;Q04637-3;E9PGM1;Q04637-4;E7EX73;Q04637-5;Q04637-7;Q04637-6;C9JF13;C9K073;C9J2Z7;C9J6B6	Q04637-9;Q04637-8;Q04637;E7EUU4;Q04637-3;E9PGM1;Q04637-4;E7EX73;Q04637-5;Q04637-7;Q04637-6;C9JF13;C9K073;C9J2Z7;C9J6B6	Eukaryotic translation initiation factor 4 gamma 1	EIF4G1	15
NaN	3.1335	NaN	+			1	9.1	12.92	0	0	0	3731600	1398200	2333400	0	0	0	NaN	C9J542	C9J542		PDLIM4	1
NaN	NaN	NaN				1	2.8	39.474	0	0	0	0	0	0	0	0	0	NaN	F8WA42;C9J660;Q8NBJ7-3;J3KQJ1;Q8NBJ7;C9JL30;E9PBT8;Q8NBJ7-2;E9PG02;F8WEX5	F8WA42;C9J660;Q8NBJ7-3;J3KQJ1;Q8NBJ7;C9JL30;E9PBT8;Q8NBJ7-2;E9PG02;F8WEX5	Sulfatase-modifying factor 2	SUMF2	10
NaN	NaN	0.92227	+			1	4.8	25.966	0	0	0	0	0	0	14259000	8744600	5514400	NaN	P11234-2;P11234-3;P11233;P11234;C9JQB3;C9J6B1;H7C3P7;C9JYR1;C9JPE8;F8WEQ6	P11234-2;P11234-3;P11233;P11234;C9JQB3;C9J6B1;H7C3P7;C9JYR1;C9JPE8;F8WEQ6	Ras-related protein Ral-A;Ras-related protein Ral-B	RALA;RALB	10
NaN	NaN	NaN				1	5.5	39.681	0	0	0	0	0	0	0	0	0	NaN	P35249;C9JZI1;P35249-2;C9J8M3;C9JTT7;C9JXZ7;F8WE44;C9JGY5	P35249;C9JZI1;P35249-2;C9J8M3;C9JTT7;C9JXZ7;F8WE44;C9JGY5	Replication factor C subunit 4	RFC4	8
0.5767	0.60555	0.57169				1	8.3	20.511	5673600	3927500	1746000	3671400	2173000	1498500	3664200	2600400	1063900	NaN	P18085;C9JAK5;U3KQF2	P18085;C9JAK5;U3KQF2	ADP-ribosylation factor 4	ARF4	3
NaN	NaN	NaN				1	1.6	107.77	0	0	0	0	0	0	0	0	0	NaN	P22102;P22102-2;F8WD69;C9JTV6;C9JBJ1;C9JKQ7;C9JZG2	P22102;P22102-2;F8WD69;C9JTV6;C9JBJ1;C9JKQ7;C9JZG2	Trifunctional purine biosynthetic protein adenosine-3;Phosphoribosylamine--glycine ligase;Phosphoribosylformylglycinamidine cyclo-ligase;Phosphoribosylglycinamide formyltransferase	GART	7
NaN	NaN	0.85019	+			1	4.7	23.205	0	0	0	0	0	0	1322200	838230	483940	NaN	C9JCC6;Q14919-2;Q14919;E9PNC7	C9JCC6;Q14919-2;Q14919;E9PNC7	Dr1-associated corepressor	DRAP1	4
1.618	1.773	1.6462				2	3.8	29.455	75947000	33890000	42057000	83996000	33337000	50658000	70674000	34132000	36542000	NaN	P22090;P62701;Q8TD47;C9JEH7	P22090;P62701;Q8TD47;C9JEH7	40S ribosomal protein S4, Y isoform 1;40S ribosomal protein S4, X isoform;40S ribosomal protein S4, Y isoform 2	RPS4Y1;RPS4X;RPS4Y2	4
0.67731	0.81763	1.207				1	3	61.594	846570	568670	277910	1415200	843570	571650	2164400	1324600	839800	NaN	O95817;C9JFK9	O95817;C9JFK9	BAG family molecular chaperone regulator 3	BAG3	2
NaN	NaN	NaN				1	0.5	262.33	0	0	0	0	0	0	0	0	0	NaN	Q13439-5;Q13439;Q13439-4;Q13439-3;H0Y6I0;C9JHJ5	Q13439-5;Q13439;Q13439-4;Q13439-3;H0Y6I0;C9JHJ5	Golgin subfamily A member 4	GOLGA4	6
NaN	1.2223	NaN				1	13.2	8.6438	0	0	0	1290000	565190	724850	0	0	0	NaN	C9JIG7	C9JIG7		TSGA13	1
NaN	NaN	NaN				1	2.5	43.447	0	0	0	0	0	0	0	0	0	NaN	Q92734;Q92734-2;Q92734-3;Q92734-4;C9JJP5;C9JUE0;C9JTY3	Q92734;Q92734-2;Q92734-3;Q92734-4;C9JJP5;C9JUE0;C9JTY3	Protein TFG	TFG	7
0.67571	NaN	NaN				1	4.4	26.319	2112300	1509900	602420	0	0	0	0	0	0	NaN	Q13907;C9JKM8	Q13907;C9JKM8	Isopentenyl-diphosphate Delta-isomerase 1	IDI1	2
1.1397	1.2184	1.1307				6	14.8	50.394	469910000	253550000	216370000	597560000	273310000	324250000	682080000	373300000	308780000	NaN	P30838;E9PNN6;I3L3I9;C9JMC5;A8MYB8;C9JKT2;P43353;P43353-2;P48448;I3L1M4;E9PJV0;J3QS00;I3L1H6;I3L4E5	P30838;E9PNN6;I3L3I9;C9JMC5;A8MYB8;C9JKT2	Aldehyde dehydrogenase, dimeric NADP-preferring	ALDH3A1	14
0.62708	NaN	NaN				2	11	24.68	2060600	1392600	667980	0	0	0	0	0	0	NaN	Q92520;C9JMN4;C9JP35	Q92520;C9JMN4;C9JP35	Protein FAM3C	FAM3C	3
0.33778	0.53656	1.0509				2	4.4	30.223	15568000	8433600	7134800	23736000	13248000	10488000	16761000	9419800	7341000	NaN	U3KQV3;U3KQA9;Q5JR05;P08134;P61586;Q5JR08;C9JX21;E9PQH6;C9JNR4;E9PN11;Q5JR07;Q5JR06;C9JRM1;E9PLA2	U3KQV3;U3KQA9;Q5JR05;P08134;P61586;Q5JR08;C9JX21;E9PQH6;C9JNR4;E9PN11;Q5JR07;Q5JR06;C9JRM1;E9PLA2	Rho-related GTP-binding protein RhoC;Transforming protein RhoA	RHOC;RHOA	14
1.454	1.3582	1.4331				1	5.1	17.779	66834000	33287000	33547000	44197000	19205000	24992000	30228000	14582000	15647000	NaN	P83731;C9JNW5;C9JXB8	P83731;C9JNW5;C9JXB8	60S ribosomal protein L24	RPL24	3
NaN	NaN	NaN				1	100	1.853	0	0	0	0	0	0	0	0	0	NaN	C9JQ22	C9JQ22		PRR15	1
NaN	NaN	NaN				1	11.3	22.083	0	0	0	0	0	0	0	0	0	NaN	Q9BRJ6;C9JQV0	Q9BRJ6;C9JQV0	Uncharacterized protein C7orf50	C7orf50	2
1.1443	1.2445	1.1705				1	2.6	99.279	138210000	77611000	60601000	122020000	58665000	63351000	149290000	82534000	66755000	NaN	Q3SYG4;Q3SYG4-3;Q3SYG4-7;Q3SYG4-4;Q3SYG4-2;Q3SYG4-6;F8WCG5;Q3SYG4-5;C9JRR5	Q3SYG4;Q3SYG4-3;Q3SYG4-7;Q3SYG4-4;Q3SYG4-2;Q3SYG4-6;F8WCG5;Q3SYG4-5;C9JRR5	Protein PTHB1	BBS9	9
0.85261	0.92234	0.96395				2	6.6	29.804	9481100	6133000	3348100	12736000	6380100	6355500	23976000	14524000	9452100	NaN	P35232;C9JW96;E9PCW0;E7ESE2;C9JZ20;P35232-2;D6RBK0	P35232;C9JW96;E9PCW0;E7ESE2;C9JZ20;P35232-2;D6RBK0	Prohibitin	PHB	7
1.0187	NaN	NaN				1	4	31.904	8318600	4807900	3510700	0	0	0	0	0	0	NaN	F6WQW2;P43487;P43487-2;C9JXG8	F6WQW2;P43487;P43487-2;C9JXG8	Ran-specific GTPase-activating protein	RANBP1	4
1.3813	NaN	NaN				1	1.4	99.028	4875200	2145300	2729900	0	0	0	0	0	0	NaN	P55884-2;P55884;C9JZG1	P55884-2;P55884;C9JZG1	Eukaryotic translation initiation factor 3 subunit B	EIF3B	3
1.0294	1.209	1.0788				2	2.9	108.17	8757000	4714900	4042100	13050000	5865200	7185000	18774000	10067000	8707000	NaN	O60716;O60716-2;O60716-3;C9JZR2;O60716-5;O60716-9;O60716-10;O60716-11;O60716-13;O60716-17;O60716-18;O60716-19;O60716-21;O60716-25;O60716-26;O60716-27;O60716-29;O60716-4;O60716-6;O60716-7;O60716-8;O60716-12;O60716-14;O60716-15;O60716-16;O60716-20;O60716-22;O60716-23;O60716-24;O60716-28;O60716-30;O60716-31;O60716-32;H0YC95	O60716;O60716-2;O60716-3;C9JZR2;O60716-5;O60716-9;O60716-10;O60716-11;O60716-13;O60716-17;O60716-18;O60716-19;O60716-21;O60716-25;O60716-26;O60716-27;O60716-29;O60716-4;O60716-6;O60716-7;O60716-8;O60716-12;O60716-14;O60716-15;O60716-16;O60716-20;O60716-22;O60716-23;O60716-24;O60716-28;O60716-30;O60716-31;O60716-32;H0YC95	Catenin delta-1	CTNND1	34
NaN	NaN	0.89818				1	2.8	56.639	0	0	0	0	0	0	1665300	970890	694410	NaN	Q9UHG3;Q9UHG3-2;F8W8W4;C9K055	Q9UHG3;Q9UHG3-2;F8W8W4;C9K055	Prenylcysteine oxidase 1	PCYOX1	4
NaN	NaN	NaN	+		+	1	2.9	51.988	0	0	0	0	0	0	0	0	0	NaN	CON__ENSEMBL:ENSBTAP00000013050	CON__ENSEMBL:ENSBTAP00000013050			1
0.98703	0.95599	0.96525			+	2	17.5	50.179	1603400000	918990000	684430000	1994600000	1021500000	973100000	1618300000	931330000	686970000	NaN	CON__ENSEMBL:ENSBTAP00000016242;P68363;Q71U36;Q13748;Q6PEY2;Q71U36-2;P68363-2;F5H5D3;Q9BQE3;Q13748-2;C9J2C0;Q9NY65;Q9NY65-2;V9GZ17;A6NHL2;A6NHL2-2;F8VVB9;F8W0F6;F8VQQ4;C9JDS9;F8VS66;F8VRZ4;F8VWV9;F8VX09;F8VRK0;F8VXZ7	CON__ENSEMBL:ENSBTAP00000016242;P68363;Q71U36;Q13748;Q6PEY2;Q71U36-2;P68363-2;F5H5D3;Q9BQE3;Q13748-2	Tubulin alpha-1B chain;Tubulin alpha-1A chain;Tubulin alpha-3C/D chain;Tubulin alpha-3E chain;Tubulin alpha-1C chain	TUBA1B;TUBA1A;TUBA3C;TUBA3E;TUBA1C	26
0.097932	1.0434	0.10446			+	3	2.6	164.34	11533000	11012000	520630	48236000	14752000	33485000	10940000	10638000	301890	NaN	CON__ENSEMBL:ENSBTAP00000024146;P20742;P01023;P20742-2	CON__ENSEMBL:ENSBTAP00000024146			4
NaN	NaN	0.020006			+	1	8.7	24.409	0	0	0	0	0	0	10133000	10011000	122260	NaN	CON__P00761	CON__P00761			1
0.99313	1.0955	1.0707			+	2	6.2	60.044	78753000	50101000	28652000	43961000	22251000	21710000	416990000	224770000	192220000	NaN	CON__P02538;CON__P04259;CON__P48668;P02538;P04259;P48668;CON__P13647;P13647;F8W0C6;CON__P50446	CON__P02538;CON__P04259;CON__P48668;P02538;P04259;P48668;CON__P13647;P13647;F8W0C6;CON__P50446	Keratin, type II cytoskeletal 6A;Keratin, type II cytoskeletal 6B;Keratin, type II cytoskeletal 6C;Keratin, type II cytoskeletal 5	KRT6A;KRT6B;KRT6C;KRT5	10
0.16112	0.2012	0.21645			+	21	38.6	69.293	1996900000	1966500000	30337000	573290000	550870000	22421000	1217200000	1176000000	41226000	NaN	CON__P02769	CON__P02769			1
NaN	NaN	NaN			+	1	4.8	24.241	0	0	0	3354500	3354500	0	0	0	0	NaN	CON__P02777	CON__P02777			1
1.0137	1.2937	1.0966			+	3	18.2	56.608	2536100000	1390500000	1145600000	4194200000	1796200000	2398000000	2730600000	1471200000	1259400000	NaN	P05787-2;CON__P05787;P05787;F8W1U3;F8VP67;CON__Q9H552;CON__H-INV:HIT000292931;CON__Q5XQN5;CON__Q922U2;CON__Q6IFZ6;CON__Q5XKE5;Q5XKE5;H0YIB2;CON__H-INV:HIT000016045	P05787-2;CON__P05787;P05787;F8W1U3;F8VP67	Keratin, type II cytoskeletal 8	KRT8	14
1.0876	1.2555	1.1448			+	2	7.2	51.417	701620000	370310000	331310000	569770000	240490000	329280000	591410000	314320000	277090000	NaN	CON__P08729;CON__Q3KNV1;P08729;CON__Q9DCV7	CON__P08729;CON__Q3KNV1;P08729;CON__Q9DCV7	Keratin, type II cytoskeletal 7	KRT7	4
NaN	0.0069745	0.2281			+	2	6.7	38.418	0	0	0	206060000	204750000	1315000	1763400	1430000	333450	NaN	CON__P12763;P02765	CON__P12763;P02765	Alpha-2-HS-glycoprotein;Alpha-2-HS-glycoprotein chain A;Alpha-2-HS-glycoprotein chain B	AHSG	2
NaN	0.061806	0.125			+	2	4.4	59.51	0	0	0	9136500	8632100	504350	10901000	10854000	47410	NaN	CON__P13645;P13645;CON__Q7Z3Y7;Q7Z3Y7	CON__P13645;P13645;CON__Q7Z3Y7;Q7Z3Y7	Keratin, type I cytoskeletal 10;Keratin, type I cytoskeletal 28	KRT10;KRT28	4
0.028349	NaN	1.6572			+	2	8.7	30.276	15515000	15373000	141680	0	0	0	3744600	2546500	1198100	NaN	CON__P15497	CON__P15497			1
0.18803	NaN	0.010863			+	4	10.1	46.103	53202000	45824000	7378600	40784000	40784000	0	4208100	4174400	33627	NaN	CON__P34955	CON__P34955			1
0.12457	NaN	0.80199			+	4	9.6	62.129	6094400	5890500	203850	0	0	0	10074000	7861700	2212600	NaN	CON__P35527;P35527;K7EQQ3	CON__P35527;P35527;K7EQQ3	Keratin, type I cytoskeletal 9	KRT9	3
0.81417	0.2578	NaN			+	2	4.3	65.865	2423800	1687400	736350	1999200	1894100	105060	0	0	0	NaN	CON__P35908;P35908;CON__Q3TTY5;CON__Q01546;Q01546;CON__P12035;P12035;CON__Q6ISB0;CON__Q9NSB2;Q9NSB2;CON__P19013;CON__Q7Z794;Q7Z794;CON__O95678;CON__Q8BGZ7;O95678;F8W1S1;CON__Q32MB2;Q86Y46;P19013;CON__Q7RTS7;Q7RTS7;CON__P07744;CON__Q9R0H5;CON__Q3SY84;Q3SY84;CON__Q6IME9;CON__Q14CN4-1;Q14CN4;Q14CN4-2;Q14CN4-3;Q86Y46-2;F8VS61;H0YHD9	CON__P35908;P35908	Keratin, type II cytoskeletal 2 epidermal	KRT2	34
NaN	0.79604	NaN			+	1	20.3	41.736	0	0	0	23123000	13824000	9299400	0	0	0	NaN	CON__P60712;P60709;E7EVS6;G5E9R0;C9JZR7;C9JTX5;Q9BYX7	CON__P60712;P60709	Actin, cytoplasmic 1;Actin, cytoplasmic 1, N-terminally processed	ACTB	7
0.8564	0.70206	NaN			+	1	19.4	6.1414	726230	430390	295840	438030	265090	172940	0	0	0	NaN	P13640;CON__P67983;P02795;P04732;P13640-2;P80297;Q8N339	P13640;CON__P67983;P02795;P04732;P13640-2;P80297;Q8N339	Metallothionein-1G;Metallothionein-2;Metallothionein-1E;Metallothionein-1X;Metallothionein-1M	MT1G;MT2A;MT1E;MT1X;MT1M	7
0.92364	0.81775	0.8701			+	2	3.7	55.802	88866000	54605000	34261000	140610000	79845000	60764000	147070000	92885000	54186000	NaN	CON__P78386;P78386;CON__Q14533;Q14533;CON__P78385;CON__Q6NT21;P78385;CON__O43790;O43790;A0A087X106;CON__Q61726;F5GYI5;A6NCN2;CON__Q9NSB4;Q9NSB4	CON__P78386;P78386;CON__Q14533;Q14533;CON__P78385;CON__Q6NT21;P78385;CON__O43790;O43790;A0A087X106;CON__Q61726;F5GYI5;A6NCN2;CON__Q9NSB4;Q9NSB4	Keratin, type II cuticular Hb5;Keratin, type II cuticular Hb1;Keratin, type II cuticular Hb3;Keratin, type II cuticular Hb6;Keratin-81-like protein;Keratin, type II cuticular Hb2	KRT85;KRT81;KRT83;KRT86;KRT82	15
0.14964	NaN	0.20448			+	9	17.2	77.738	106710000	101720000	4990300	43109000	43109000	0	171210000	149900000	21307000	NaN	CON__Q0IIK2;CON__Q29443;P02788;E7ER44;E7EQB2;P02788-2	CON__Q0IIK2;CON__Q29443			6
NaN	NaN	NaN			+	1	6.8	24.536	0	0	0	0	0	0	0	0	0	NaN	CON__Q1RMN8	CON__Q1RMN8			1
0.65722	0.62791	0.60283			+	3	11.3	33.012	2844300	1956500	887750	43335000	27570000	15766000	20187000	14330000	5856800	NaN	CON__Q3SX28;P07951-2;Q5TCU8;P07951;Q5TCU3;P07951-3	CON__Q3SX28;P07951-2;Q5TCU8;P07951;Q5TCU3;P07951-3	Tropomyosin beta chain	TPM2	6
0.38259	NaN	0.23439			+	3	6.9	68.587	2111400	2068200	43254	10094000	10094000	0	75626000	68389000	7237300	NaN	CON__Q3SZ57;J3KMX3;P02771	CON__Q3SZ57			3
0.020911	NaN	NaN			+	1	7.4	23.182	27308000	27137000	170950	0	0	0	0	0	0	NaN	CON__Q3SZR3	CON__Q3SZR3			1
NaN	NaN	NaN			+	1	6.8	62.87	0	0	0	0	0	0	0	0	0	NaN	CON__Q3ZBD7	CON__Q3ZBD7			1
NaN	NaN	NaN			+	2	6.7	42.663	0	0	0	27456000	27456000	0	0	0	0	NaN	CON__Q58D62	CON__Q58D62			1
1.0203	1.3044	1.1026			+	1	4.8	58.911	459870000	248720000	211150000	631040000	276140000	354890000	209420000	112440000	96974000	NaN	CON__Q6NXH9	CON__Q6NXH9			1
NaN	NaN	NaN			+	1	5.3	57.552	0	0	0	0	0	0	602390	602390	0	NaN	CON__Q8VED5	CON__Q8VED5			1
NaN	NaN	NaN			+	1	2.4	46.324	0	0	0	0	0	0	0	0	0	NaN	P05543;CON__Q9TT36	P05543;CON__Q9TT36	Thyroxine-binding globulin	SERPINA7	2
NaN	1.3844	1.1671				4	4.4	102.33	0	0	0	12461000	6899500	5561100	5772300	2956100	2816200	NaN	D3DQV9;P78344;H0Y3P2;P78344-2;E9PKF8	D3DQV9;P78344;H0Y3P2;P78344-2;E9PKF8	Eukaryotic translation initiation factor 4 gamma 2	EIF4G2	5
1.1626	1.14	1.2404				6	35.3	17.962	46522000	24978000	21544000	74242000	35044000	39198000	82081000	44099000	37982000	NaN	F8W727;P62910;D3YTB1;D3YTI8	F8W727;P62910;D3YTB1	60S ribosomal protein L32	RPL32	4
NaN	NaN	NaN				1	1.8	69.039	0	0	0	0	0	0	0	0	0	NaN	Q9Y6I3-1;Q9H201;Q9Y6I3;Q9Y6I3-3;I6L9I8;Q9H201-2;D6REL6;D6RFG3;D6RBR6;D6RBI9;D6R907	Q9Y6I3-1;Q9H201;Q9Y6I3;Q9Y6I3-3;I6L9I8;Q9H201-2;D6REL6;D6RFG3;D6RBR6;D6RBI9;D6R907	Epsin-3;Epsin-1	EPN3;EPN1	11
0.8726	NaN	NaN				1	3.6	37.039	15254000	9106700	6147000	0	0	0	0	0	0	NaN	Q12904-2;Q12904;D6R937	Q12904-2;Q12904;D6R937	Aminoacyl tRNA synthase complex-interacting multifunctional protein 1;Endothelial monocyte-activating polypeptide 2	AIMP1	3
0.90439	NaN	1.0758				3	8.4	60.004	15898000	8734700	7163700	0	0	0	2759500	1477600	1281900	NaN	E9PF82;Q13557-11;Q13557-4;Q13557-6;E9PBG7;Q13557-3;Q13557;D6R938;Q13557-5;Q13557-10;Q13557-9;Q13557-12;Q13557-8;Q13554;Q13555-6;A0A0A0MT11;Q13555;Q13555-8;Q13555-2;Q13554-2;Q13555-9;A0A0A0MS52;Q13555-7;Q13555-4;Q13555-5;Q13555-3;Q13554-5;Q13554-8;Q5SWX3;Q13554-3;Q13555-10;Q13554-6;Q9UQM7-2;Q13554-4;Q9UQM7;Q8WU40;Q13554-7;H7BXS4;H0Y6G2;H0Y9C2;H0Y9J2	E9PF82;Q13557-11;Q13557-4;Q13557-6;E9PBG7;Q13557-3;Q13557;D6R938;Q13557-5;Q13557-10;Q13557-9;Q13557-12;Q13557-8	Calcium/calmodulin-dependent protein kinase type II subunit delta	CAMK2D	41
1.3894	1.3867	1.3925				6	28.6	26.839	715210000	366300000	348910000	1178000000	503460000	674520000	1461600000	713970000	747630000	NaN	D6R956;P09936;D6RE83;D6R974;D6RF53	D6R956;P09936;D6RE83;D6R974	Ubiquitin carboxyl-terminal hydrolase isozyme L1	UCHL1	5
1.0305	0.78495	0.75571				2	6.3	39.638	536960	292090	244870	25566000	14109000	11457000	17072000	11502000	5570100	NaN	Q9H2U2-2;Q9H2U2;Q9H2U2-3;Q9H2U2-6;H0Y9D8;D6R967	Q9H2U2-2;Q9H2U2;Q9H2U2-3;Q9H2U2-6;H0Y9D8;D6R967	Inorganic pyrophosphatase 2, mitochondrial	PPA2	6
0.91825	0.7673	0.81933				2	6.6	35.967	34633000	20590000	14043000	84510000	48067000	36443000	47622000	24946000	22676000	NaN	Q99729-2;D6RBZ0;Q99729-3;D6RD18;D6R9P3;Q99729;Q99729-4	Q99729-2;D6RBZ0;Q99729-3;D6RD18;D6R9P3;Q99729;Q99729-4	Heterogeneous nuclear ribonucleoprotein A/B	HNRNPAB	7
NaN	1.3722	NaN				1	7	21.252	0	0	0	168530	72715	95815	0	0	0	NaN	Q9UM13;D6RA92;D6RD74;D6R9Q5;D6RB36	Q9UM13;D6RA92;D6RD74;D6R9Q5;D6RB36	Anaphase-promoting complex subunit 10	ANAPC10	5
1.3684	NaN	NaN				2	5.3	51.229	22909000	6798700	16110000	0	0	0	0	0	0	NaN	G8JLB6;P31943;E9PCY7;D6RBM0;D6RIH9;D6RJ04;D6RDU3;D6RIU0;D6RIT2;D6RFM3;D6R9T0;E5RGV0;D6RAM1;E7EQJ0;E7EN40;H0YAQ2;E5RGH4;D6RDL0;D6RF17;D6R9D3;E5RJ94	G8JLB6;P31943;E9PCY7;D6RBM0;D6RIH9;D6RJ04;D6RDU3;D6RIU0;D6RIT2;D6RFM3;D6R9T0;E5RGV0;D6RAM1;E7EQJ0;E7EN40;H0YAQ2;E5RGH4;D6RDL0;D6RF17;D6R9D3;E5RJ94	Heterogeneous nuclear ribonucleoprotein H;Heterogeneous nuclear ribonucleoprotein H, N-terminally processed	HNRNPH1	21
NaN	NaN	NaN				2	9	36.375	0	0	0	0	0	0	0	0	0	NaN	P12429;D6RA82;D6RFG5	P12429;D6RA82;D6RFG5	Annexin A3;Annexin	ANXA3	3
0.98161	1.0345	1.1149				5	16.1	38.434	134760000	87423000	47335000	96340000	51582000	44758000	104620000	70995000	33627000	NaN	Q14103;Q14103-2;Q14103-3;Q14103-4;H0Y8G5;D6RAF8;H0YA96;D6RF44;D6RBQ9;D6RD83	Q14103;Q14103-2;Q14103-3;Q14103-4;H0Y8G5;D6RAF8;H0YA96;D6RF44;D6RBQ9;D6RD83	Heterogeneous nuclear ribonucleoprotein D0	HNRNPD	10
1.4136	1.5975	1.4042				2	15.1	21.863	31458000	13801000	17657000	21918000	8408200	13510000	14690000	7258600	7431200	NaN	P32969;D6RAN4;H0Y9V9;E7ESE0;H0Y9R4	P32969;D6RAN4;H0Y9V9;E7ESE0;H0Y9R4	60S ribosomal protein L9	RPL9	5
0.77309	1.2101	0.88693				2	6.6	35.936	10832000	6657100	4175200	18852000	9584700	9267500	22788000	13723000	9065100	NaN	P08758;D6RBL5;D6RBE9	P08758;D6RBL5;D6RBE9	Annexin A5;Annexin	ANXA5	3
NaN	1.0237	0.97369				1	4.4	28.777	0	0	0	3674900	1863600	1811400	4126400	2339500	1786900	NaN	P06730-2;D6RBW1;P06730-3;P06730;H0Y8J7	P06730-2;D6RBW1;P06730-3;P06730;H0Y8J7	Eukaryotic translation initiation factor 4E	EIF4E	5
NaN	NaN	0.88347				1	5.9	22.966	0	0	0	0	0	0	689490	381160	308330	NaN	Q9Y6G5;D6RJ90;D6RC04;H0Y9N4	Q9Y6G5;D6RJ90;D6RC04;H0Y9N4	COMM domain-containing protein 10	COMMD10	4
NaN	NaN	0.62502				1	2.7	58.47	0	0	0	0	0	0	2534600	1785500	749110	NaN	O60749;O60749-2;D6RC15	O60749;O60749-2;D6RC15	Sorting nexin-2	SNX2	3
0.97028	NaN	NaN				1	0.6	175.48	4141800	2311100	1830800	0	0	0	0	0	0	NaN	Q6PGP7;D6RCE2	Q6PGP7;D6RCE2	Tetratricopeptide repeat protein 37	TTC37	2
NaN	NaN	NaN				1	5.4	25.499	0	0	0	0	0	0	0	0	0	NaN	Q7L9L4-2;Q7L9L4;D6RCK3	Q7L9L4-2;Q7L9L4;D6RCK3	MOB kinase activator 1B	MOB1B	3
NaN	0.82653	NaN				1	1.2	136.22	0	0	0	8374400	4768400	3606000	0	0	0	NaN	D6REX3;O94979-8;O94979;O94979-2;O94979-9;O94979-4;O94979-10;O94979-3;O94979-6;D6RHZ5;O94979-5;H0Y9T9;D6RCQ9;D6RE64	D6REX3;O94979-8;O94979;O94979-2;O94979-9;O94979-4;O94979-10;O94979-3;O94979-6;D6RHZ5;O94979-5;H0Y9T9;D6RCQ9;D6RE64	Protein transport protein Sec31A	SEC31A	14
NaN	0.6455	0.79033				2	2	164.44	0	0	0	3037400	1750400	1287000	6033400	3918300	2115100	NaN	G5EA03;Q9UPQ0-3;Q9UPQ0;Q9UPQ0-4;Q9UPQ0-2;Q9UPQ0-10;D6RD46;H0Y8P3;E9PDJ9;Q9UPQ0-5;Q9UPQ0-6;E7EPK0;Q9UPQ0-8;Q9UPQ0-9	G5EA03;Q9UPQ0-3;Q9UPQ0;Q9UPQ0-4;Q9UPQ0-2;Q9UPQ0-10;D6RD46;H0Y8P3;E9PDJ9;Q9UPQ0-5;Q9UPQ0-6;E7EPK0;Q9UPQ0-8;Q9UPQ0-9	LIM and calponin homology domains-containing protein 1	LIMCH1	14
0.86666	0.74796	1.1124				1	2.6	66.193	17346000	10013000	7333600	10557000	6786100	3771000	20371000	12560000	7811100	NaN	O75083;D6RD66	O75083;D6RD66	WD repeat-containing protein 1	WDR1	2
1.2918	1.0782	0.33925				1	6.2	17.699	269870	126750	143120	150560	69979	80582	236550	186480	50075	NaN	P20290-2;D6RDG3	P20290-2;D6RDG3		BTF3	2
NaN	NaN	0.5214				1	1.6	65.601	0	0	0	0	0	0	3346900	2159900	1187000	NaN	Q13123;E7EQZ7;D6REL4	Q13123;E7EQZ7;D6REL4	Protein Red	IK	3
0.87116	1.0458	1.0305				4	10	50.822	9093600	5760500	3333100	22373000	11553000	10820000	11549000	6050600	5498600	NaN	Q9NVA2-2;D6RER5;Q9NVA2;D6RGI3;H0Y961;H0Y9G8;Q14141;B1AMS2;Q14141-4;Q14141-2;D6RDU5;Q14141-3;D6R9Y6;D6RDP1	Q9NVA2-2;D6RER5;Q9NVA2;D6RGI3;H0Y961;H0Y9G8	Septin-11	2017-09-11	14
0.98087	0.99928	0.78962	+			1	0.7	109.64	70495000	41283000	29211000	74510000	38111000	36399000	181300000	106150000	75150000	NaN	Q8N960-2;D6REX9	Q8N960-2;D6REX9		CEP120	2
NaN	0.96616	NaN				1	4.5	39.724	0	0	0	3138100	1808800	1329300	0	0	0	NaN	P11766;D6RFE4	P11766;D6RFE4	Alcohol dehydrogenase class-3	ADH5	2
NaN	NaN	NaN				1	5.6	49.149	0	0	0	0	0	0	0	0	0	NaN	Q92552-2;Q92552;G5EA06;D6RH20	Q92552-2;Q92552;G5EA06;D6RH20	28S ribosomal protein S27, mitochondrial	MRPS27	4
NaN	NaN	0.98604				1	5.7	25.19	0	0	0	0	0	0	4170100	3361600	808510	NaN	P09497;P09497-2;D6RJD1	P09497;P09497-2;D6RJD1	Clathrin light chain B	CLTB	3
NaN	1.4152	NaN				1	3.7	31.918	0	0	0	1559500	690660	868850	0	0	0	NaN	D6W5Y5;Q14011-2;K7EQR7;K7ER40;Q14011;K7EPM4;K7EMY9;K7EJV1;K7ELT6;K7EJV5;K7ELV6;K7ENX8	D6W5Y5;Q14011-2;K7EQR7;K7ER40;Q14011;K7EPM4;K7EMY9;K7EJV1;K7ELT6;K7EJV5;K7ELV6;K7ENX8	Cold-inducible RNA-binding protein	CIRBP	12
1.3452	0.85326	1.0463				3	4.1	72.765	39776000	23445000	16331000	13508000	7360300	6147500	49268000	27398000	21870000	NaN	P48506;E1CEI4;A0A0C4DGB2;H0Y9I7;D6R959;D6REX4;H0YAB6	P48506;E1CEI4;A0A0C4DGB2;H0Y9I7	Glutamate--cysteine ligase catalytic subunit	GCLC	7
NaN	0.46296	0.36611				2	9	35.98	0	0	0	6259500	4440600	1818900	2724200	2191800	532460	NaN	P32322-3;P32322;E2QRB3;P32322-2;J3KQ22;J3QKT4	P32322-3;P32322;E2QRB3;P32322-2;J3KQ22;J3QKT4	Pyrroline-5-carboxylate reductase 1, mitochondrial	PYCR1	6
0.96905	1.1309	NaN				2	17.8	17.676	11674000	6751700	4922000	10559000	5067800	5491300	0	0	0	NaN	Q8WVJ2;E5RFP0	Q8WVJ2;E5RFP0	NudC domain-containing protein 2	NUDCD2	2
1.0572	0.91949	0.90319				2	7.8	36.067	15300000	9104500	6195800	24570000	12935000	11635000	29561000	18676000	10885000	NaN	Q16698;Q16698-2;E5RFV2;E5RJG7;E5RJD2;E5RID6	Q16698;Q16698-2;E5RFV2;E5RJG7;E5RJD2;E5RID6	2,4-dienoyl-CoA reductase, mitochondrial	DECR1	6
NaN	NaN	NaN				1	1.7	120.9	0	0	0	0	0	0	0	0	0	NaN	Q05397-5;Q05397;Q05397-7;E5RGA6;E5RJP0;E5RFW9;E5RI72;E5RG66;E5RH01;E5RH48;E5RG54;E5RIK4;E5RH08	Q05397-5;Q05397;Q05397-7;E5RGA6;E5RJP0;E5RFW9;E5RI72;E5RG66;E5RH01;E5RH48;E5RG54;E5RIK4;E5RH08	Focal adhesion kinase 1	PTK2	13
NaN	NaN	0.74863				1	1.4	96.557	0	0	0	0	0	0	3661700	2351000	1310700	NaN	P33991;E5RG31	P33991;E5RG31	DNA replication licensing factor MCM4	MCM4	2
0.84182	0.92131	1.0566				2	8.8	22.448	491500	299840	191660	457350	255720	201630	82845	48093	34752	NaN	E5RGA9;P37235;P61601;P84074;E9PC71;H7BZC1	E5RGA9;P37235;P61601;P84074;E9PC71;H7BZC1	Hippocalcin-like protein 1;Neurocalcin-delta;Neuron-specific calcium-binding protein hippocalcin	NCALD;HPCAL1;HPCA	6
NaN	NaN	NaN				1	37	12.203	0	0	0	0	0	0	0	0	0	NaN	E5RGH3;E5RJB9;Q96DU9;Q96DU9-2;Q4VXU2-2;E5RH24	E5RGH3;E5RJB9		PABPC1	6
0.58274	0.5112	NaN				1	10.2	21.802	19986000	13344000	6641500	16200000	10657000	5542700	0	0	0	NaN	Q93045-2;Q93045;E5RGX5	Q93045-2;Q93045;E5RGX5	Stathmin-2;Stathmin	STMN2	3
NaN	NaN	NaN				1	12.8	15.179	0	0	0	0	0	0	0	0	0	NaN	O15116;E5RH18;E5RJ47	O15116;E5RH18;E5RJ47	U6 snRNA-associated Sm-like protein LSm1	LSM1	3
1.1054	NaN	NaN				1	3.6	45.675	3496000	1958500	1537500	0	0	0	0	0	0	NaN	Q8N6T3-2;Q8N6T3;Q8N6T3-3;Q8N6T3-5;F8VWH9;Q8N6T3-4;F8W1U7;E5RHT6;E5RHH7	Q8N6T3-2;Q8N6T3;Q8N6T3-3;Q8N6T3-5;F8VWH9;Q8N6T3-4;F8W1U7;E5RHT6;E5RHH7	ADP-ribosylation factor GTPase-activating protein 1	ARFGAP1	9
NaN	0.86956	1.1093				1	3.5	37.839	0	0	0	4448300	1960800	2487500	5552900	3562600	1990400	NaN	O94905;E5RHW4;E5RJ09	O94905;E5RHW4;E5RJ09	Erlin-2	ERLIN2	3
1.2739	1.1065	NaN				1	4.1	56.914	198100	97879	100220	299790	138250	161540	0	0	0	NaN	Q6NXR4;E5RIH5	Q6NXR4;E5RIH5	TELO2-interacting protein 2	TTI2	2
NaN	1.1235	NaN				1	2.1	87.156	0	0	0	1499500	778280	721180	0	0	0	NaN	Q9Y263;E5RIM3;H0YBW4	Q9Y263;E5RIM3;H0YBW4	Phospholipase A-2-activating protein	PLAA	3
NaN	NaN	NaN	+			1	6.8	16.604	0	0	0	0	0	0	0	0	0	NaN	E5RJ14	E5RJ14		PDGFRB	1
0.85367	1.1133	0.87843				1	3	75.378	12781000	7986100	4795000	7924700	3605600	4319200	25255000	15617000	9637500	NaN	P54136;P54136-2;E5RJM9	P54136;P54136-2;E5RJM9	Arginine--tRNA ligase, cytoplasmic	RARS	3
1.1661	1.1943	1.111				5	11.7	63.836	30967000	11323000	19644000	6838300	3341700	3496600	16513000	9331800	7181100	NaN	Q86UE4;E5RJU9;H0YB56;H0YBJ8	Q86UE4;E5RJU9	Protein LYRIC	MTDH	4
NaN	NaN	1.0382				1	23.4	5.5982	0	0	0	0	0	0	58515000	32948000	25566000	NaN	E5RJX4	E5RJX4		PPP2CB	1
0.87147	NaN	1.0454				1	2.4	75.872	1808200	1103300	704900	0	0	0	4395200	2417600	1977600	NaN	P08133;P08133-2;E5RK69	P08133;P08133-2;E5RK69	Annexin A6;Annexin	ANXA6	3
1.3335	1.2796	1.1057				2	2.8	81.582	32336000	19253000	13083000	3283800	1523400	1760500	34551000	17745000	16807000	NaN	H0Y4R2;P16435;E7EMD0	H0Y4R2;P16435;E7EMD0	NADPH--cytochrome P450 reductase	POR	3
NaN	0.70238	NaN				1	0.8	129.29	0	0	0	6958900	3911900	3046900	0	0	0	NaN	P17301;E7ESP4;E7EMF1;E9PB77	P17301;E7ESP4;E7EMF1;E9PB77	Integrin alpha-2	ITGA2	4
NaN	NaN	NaN				1	5.4	23.106	0	0	0	0	0	0	0	0	0	NaN	G1AUC5;P41236;Q6NXS1;E7EMN6;E7EUI7	G1AUC5;P41236;Q6NXS1;E7EMN6;E7EUI7	Protein phosphatase inhibitor 2;Putative protein phosphatase inhibitor 2-like protein 3	PPP1R2;PPP1R2P3	5
1.4038	1.3188	1.6545				3	15.8	23.699	9025100	4459000	4566200	10297000	4896700	5400400	7193900	3500600	3693300	NaN	G3V3D1;E7EMS2;G3V3E8;P61916;J3KMY5;P61916-2;G3V2V8;H0YIZ1	G3V3D1;E7EMS2;G3V3E8;P61916;J3KMY5;P61916-2;G3V2V8;H0YIZ1	Epididymal secretory protein E1	NPC2	8
1.0534	NaN	NaN				2	2.4	71.456	7019200	4237600	2781600	0	0	0	0	0	0	NaN	Q13409;Q13409-5;Q13409-2;Q13409-7;Q13409-3;Q13409-6;E7EQL5;E7EV09;E7EMU4;E7ESD3;E7EQU2;E7ETL8;E7ET01;E7ERH4;E7ERR6;E7EUM4;E7EU01;E9PGG1	Q13409;Q13409-5;Q13409-2;Q13409-7;Q13409-3;Q13409-6;E7EQL5;E7EV09;E7EMU4;E7ESD3;E7EQU2;E7ETL8;E7ET01;E7ERH4;E7ERR6;E7EUM4;E7EU01;E9PGG1	Cytoplasmic dynein 1 intermediate chain 2	DYNC1I2	18
1.7378	0.99017	0.96304				2	27.3	22.677	7799200	4758700	3040400	12325000	6755900	5569300	12944000	7922200	5022100	NaN	P62820;E7END7;P62820-2;P62820-3	P62820;E7END7;P62820-2;P62820-3	Ras-related protein Rab-1A	RAB1A	4
1.2857	1.3921	1.3895				1	7.8	24.146	46568000	23927000	22642000	40846000	16737000	24108000	36122000	18323000	17799000	NaN	P61313;E7ENU7;E7EQV9;P61313-2;E7EX53	P61313;E7ENU7;E7EQV9;P61313-2;E7EX53	60S ribosomal protein L15;Ribosomal protein L15	RPL15	5
1.0309	1.235	0.87154				6	13.9	59.67	30710000	14311000	16399000	36163000	19136000	17027000	77076000	45912000	31164000	NaN	P48643;E7ENZ3;E9PCA1;B7ZAR1;P48643-2;D6RIZ7	P48643;E7ENZ3;E9PCA1;B7ZAR1;P48643-2	T-complex protein 1 subunit epsilon	CCT5	6
1.4999	1.5338	NaN				1	4.7	23.432	907600	518140	389460	527560	202220	325340	0	0	0	NaN	P50914;E7EPB3	P50914;E7EPB3	60S ribosomal protein L14	RPL14	2
0.93361	0.92052	0.8736				2	5.9	50.694	69606000	41935000	27671000	54672000	29971000	24700000	77564000	47317000	30248000	NaN	E7EPK1;Q16181;Q16181-2;E7ES33;G3V1Q4;Q6ZU15;A0A0U1RRE1;A0A0U1RRH9	E7EPK1;Q16181;Q16181-2;E7ES33;G3V1Q4;Q6ZU15;A0A0U1RRE1;A0A0U1RRH9	Septin-7;Septin-14	SEPT7;SEPT14	8
NaN	NaN	1.4503	+			1	4.3	26.864	0	0	0	0	0	0	2641500	1092800	1548700	NaN	E7EQ34;O14653-2;O14653;O14653-3;I3L4Z6;I3L1K7	E7EQ34;O14653-2;O14653;O14653-3;I3L4Z6;I3L1K7	Golgi SNAP receptor complex member 2	GOSR2	6
0.76763	0.99813	0.98058				1	6	22.761	4732800	3041400	1691400	3304500	1988200	1316300	6963100	4275300	2687800	NaN	Q15363;E7EQ72	Q15363;E7EQ72	Transmembrane emp24 domain-containing protein 2	TMED2	2
0.63324	0.60438	0.71307				1	3.6	42.794	1465200	966030	499140	4801500	2753400	2048100	1287800	676190	611600	NaN	P51553;P51553-2;E7EQB8;G5E9Q7;E9PF84	P51553;P51553-2;E7EQB8;G5E9Q7;E9PF84	Isocitrate dehydrogenase [NAD] subunit gamma, mitochondrial	IDH3G	5
0.81929	0.77236	0.85573				4	8.5	69.371	255050000	161600000	93454000	191650000	109330000	82318000	645320000	395800000	249520000	NaN	E7EQR4;P15311	E7EQR4;P15311	Ezrin	EZR	2
0.86581	0.99696	0.82529				3	11.5	22.98	1900100	1092600	807420	617220	259890	357330	1046700	674720	372020	NaN	O15347;E7EQU1;E7ES08;E9PES6	O15347;E7EQU1;E7ES08;E9PES6	High mobility group protein B3	HMGB3	4
NaN	NaN	1.172				1	1.7	83.024	0	0	0	0	0	0	9016200	4515000	4501200	NaN	P51659-2;P51659;P51659-3;E7EWE5;E7ER27	P51659-2;P51659;P51659-3;E7EWE5;E7ER27	Peroxisomal multifunctional enzyme type 2;(3R)-hydroxyacyl-CoA dehydrogenase;Enoyl-CoA hydratase 2	HSD17B4	5
0.9771	0.84955	0.74286				1	1.8	60.343	51736000	30688000	21048000	50866000	27209000	23657000	85620000	54036000	31584000	NaN	P17987;E7ERF2;F5H136;F5H676;F5GZI8;F5H726	P17987;E7ERF2;F5H136;F5H676;F5GZI8;F5H726	T-complex protein 1 subunit alpha	TCP1	6
NaN	NaN	NaN				1	5.3	38.631	0	0	0	0	0	0	0	0	0	NaN	P62136-2;P36873-2;F8W0W8;P62136;P62140;P36873;F8VYE8;P62136-3;F8VR82;E7ETD8;H0Y3Y6	P62136-2;P36873-2;F8W0W8;P62136;P62140;P36873;F8VYE8;P62136-3;F8VR82;E7ETD8;H0Y3Y6	Serine/threonine-protein phosphatase;Serine/threonine-protein phosphatase PP1-alpha catalytic subunit;Serine/threonine-protein phosphatase PP1-beta catalytic subunit;Serine/threonine-protein phosphatase PP1-gamma catalytic subunit	PPP1CC;PPP1CA;PPP1CB	11
0.98906	1.1967	NaN				2	5.4	43.448	8635100	4976100	3659000	3422200	1768300	1654000	0	0	0	NaN	Q01085-2;Q01085;E7ETJ9;P31483;F8W8I6;P31483-2;C9JTN7;P31483-3;E5RG67;H7BY49;E5RGV5;E7ETC0;A6NKZ9	Q01085-2;Q01085;E7ETJ9;P31483;F8W8I6;P31483-2;C9JTN7;P31483-3;E5RG67;H7BY49;E5RGV5;E7ETC0;A6NKZ9	Nucleolysin TIAR;Nucleolysin TIA-1 isoform p40	TIAL1;TIA1	13
NaN	0.66067	0.77902				1	0.9	155.93	0	0	0	89058	57428	31630	1214800	738320	476470	NaN	Q13428-4;Q13428-3;E7ETY2;Q13428;Q13428-7;Q13428-6;J3KQ96;Q13428-8;Q13428-2;H0YA99	Q13428-4;Q13428-3;E7ETY2;Q13428;Q13428-7;Q13428-6;J3KQ96;Q13428-8;Q13428-2;H0YA99	Treacle protein	TCOF1	10
1.6369	NaN	NaN				3	1.3	377.13	5554000	2301200	3252700	0	0	0	0	0	0	NaN	Q14789-2;Q14789;Q14789-3;Q14789-4;E7EU81;H0Y867	Q14789-2;Q14789;Q14789-3;Q14789-4;E7EU81	Golgin subfamily B member 1	GOLGB1	6
1.0686	1.0892	1.0987				13	8.4	245.44	114740000	51362000	63379000	107740000	53866000	53875000	108630000	62118000	46513000	NaN	E7EVA0;P27816;P27816-6;P27816-2;P27816-5;P27816-4;H7C456;F8W9U4;H7C4C5;H0Y2V1;B5MEG9;A0A0J9YW37;P27816-7;A0A0J9YVV8	E7EVA0;P27816;P27816-6;P27816-2	Microtubule-associated protein;Microtubule-associated protein 4	MAP4	14
NaN	2.0099	NaN				1	4	27.572	0	0	0	2415100	1165000	1250100	0	0	0	NaN	Q08623-4;Q08623;Q08623-3;E7EVH9	Q08623-4;Q08623;Q08623-3;E7EVH9	Pseudouridine-5-monophosphatase	HDHD1	4
0.51435	0.78803	0.70346				2	10.4	26.585	11680000	7933000	3746900	15950000	9137000	6813500	11538000	7593900	3944000	NaN	E9PF49;Q9Y6M9;E7EWZ0;E9PH64	E9PF49;Q9Y6M9;E7EWZ0;E9PH64	NADH dehydrogenase [ubiquinone] 1 beta subcomplex subunit 9	NDUFB9	4
NaN	NaN	1.6673				1	2.3	69.697	0	0	0	0	0	0	307120	143490	163630	NaN	E7EX17;P23588;P23588-2	E7EX17;P23588;P23588-2	Eukaryotic translation initiation factor 4B	EIF4B	3
0.85975	0.86474	0.9041				2	4.2	93.23	2166500	1356100	810440	2170000	1101800	1068200	5278400	3093400	2185000	NaN	Q05682;Q05682-2;Q05682-6;Q05682-3;E7EX44;Q05682-4;E9PGZ1;Q05682-5;C9J813	Q05682;Q05682-2;Q05682-6;Q05682-3;E7EX44;Q05682-4;E9PGZ1;Q05682-5;C9J813	Caldesmon	CALD1	9
NaN	0.94934	0.93495				1	0.8	141.69	0	0	0	7685200	4395300	3289900	5614900	3212100	2402800	NaN	Q14203;Q14203-6;E7EX90;Q14203-4;Q14203-3;Q14203-2;Q14203-5;Q6AWB1	Q14203;Q14203-6;E7EX90;Q14203-4;Q14203-3;Q14203-2;Q14203-5;Q6AWB1	Dynactin subunit 1	DCTN1;DKFZp686E0752	8
1.1594	0.96596	1.4136				4	2.7	205.42	51801000	27207000	24594000	8200700	3504800	4695900	50618000	24143000	26475000	NaN	E9PAV3;E9PAV3-2;Q13765;H0YHX9;F8VZJ2;F8W0W4;F8VNW4;F8W1N5;Q9BZK3;F8VZ58	E9PAV3;E9PAV3-2;Q13765;H0YHX9;F8VZJ2;F8W0W4;F8VNW4;F8W1N5	Nascent polypeptide-associated complex subunit alpha	NACA	10
0.86693	0.82753	0.85674				5	12.3	47.958	65657000	40475000	25182000	28846000	16240000	12605000	40849000	24927000	15922000	NaN	P22234-2;P22234;E9PBS1;D6RF62	P22234-2;P22234;E9PBS1	Multifunctional protein ADE2;Phosphoribosylaminoimidazole-succinocarboxamide synthase;Phosphoribosylaminoimidazole carboxylase	PAICS	4
NaN	0.69664	NaN				1	3.1	47.137	0	0	0	7168400	4095500	3072900	0	0	0	NaN	Q53H12;E9PC15;E9PG39	Q53H12;E9PC15;E9PG39	Acylglycerol kinase, mitochondrial	AGK	3
1.1586	1.1594	1.3537				0	8.5	52.314	12674000	6633800	6040400	13734000	6294100	7439700	16567000	8377000	8189700	NaN	Q16576-2;Q16576;E9PC52;Q5JP01	Q16576-2;Q16576;E9PC52;Q5JP01	Histone-binding protein RBBP7	RBBP7	4
1.0025	NaN	0.84733				1	1.7	80.651	6095000	3709400	2385600	0	0	0	9800200	5424600	4375500	NaN	Q9BYT8;E9PCB6;H0YAK4;H0YAF7	Q9BYT8;E9PCB6;H0YAK4;H0YAF7	Neurolysin, mitochondrial	NLN	4
NaN	0.84391	2.0663				1	0.9	131.98	0	0	0	970360	526680	443680	649750	233720	416040	NaN	O43795;E9PDF6;O43795-2;H7C2Y7	O43795;E9PDF6;O43795-2;H7C2Y7	Unconventional myosin-Ib	MYO1B	4
1.1814	1.075	1.1583				2	4.9	68.903	22331000	12061000	10270000	441260	208660	232600	920020	478760	441260	NaN	E9PEB5;Q96AE4-2;Q96AE4;C9JSZ1	E9PEB5;Q96AE4-2;Q96AE4;C9JSZ1	Far upstream element-binding protein 1	FUBP1	4
1.1937	1.4534	1.0936				2	6.3	54.177	28655000	15279000	13375000	41587000	18366000	23220000	19957000	11266000	8690900	NaN	P09622;E9PEX6;P09622-3;P09622-2	P09622;E9PEX6;P09622-3;P09622-2	Dihydrolipoyl dehydrogenase, mitochondrial	DLD	4
NaN	0.75467	NaN				1	0.5	155.2	0	0	0	3080900	1705800	1375100	0	0	0	NaN	O75694;O75694-2;E9PF10	O75694;O75694-2;E9PF10	Nuclear pore complex protein Nup155	NUP155	3
NaN	0.82002	NaN				1	1	160.9	0	0	0	1326500	723380	603100	0	0	0	NaN	O75116;E9PF63;Q14DU5	O75116;E9PF63;Q14DU5	Rho-associated protein kinase 2	ROCK2	3
0.11352	NaN	NaN				1	0.8	174.78	599190	565890	33301	0	0	0	530440	530440	0	NaN	J3KP97;Q5T9S5;E9PFB9;Q5T9S5-2;Q5T9S2	J3KP97;Q5T9S5;E9PFB9;Q5T9S5-2;Q5T9S2	Coiled-coil domain-containing protein 18	CCDC18	5
1.1881	1.3462	1.4006				1	5	31.566	23747000	13498000	10249000	15727000	7301100	8426300	10335000	5543200	4792300	NaN	Q9Y2Q3-2;Q9Y2Q3;Q9Y2Q3-3;E9PFN5;Q9Y2Q3-4	Q9Y2Q3-2;Q9Y2Q3;Q9Y2Q3-3;E9PFN5;Q9Y2Q3-4	Glutathione S-transferase kappa 1	GSTK1	5
NaN	NaN	NaN				1	11	17.342	0	0	0	0	0	0	0	0	0	NaN	Q96A26;F8W7Q4;E9PH05	Q96A26;F8W7Q4;E9PH05	Protein FAM162A	FAM162A	3
NaN	NaN	NaN				1	1.5	104.74	0	0	0	0	0	0	0	0	0	NaN	P43246;E9PHA6;P43246-2	P43246;E9PHA6;P43246-2	DNA mismatch repair protein Msh2	MSH2	3
NaN	NaN	NaN				1	1.7	112.59	0	0	0	0	0	0	0	0	0	NaN	O43491;E9PHY5;O43491-4;E9PK52;O43491-3;E9PII3;O43491-2;E9PQD2;E9PIG0;E9PRG1;E9PQN0;E9PJP4	O43491;E9PHY5;O43491-4;E9PK52;O43491-3;E9PII3;O43491-2;E9PQD2;E9PIG0;E9PRG1;E9PQN0;E9PJP4	Band 4.1-like protein 2	EPB41L2	12
0.85907	1.0714	0.99237				2	2.3	76.569	29513000	16207000	13306000	21176000	10662000	10514000	151660000	87612000	64050000	NaN	E9PRY8;P29692-2;A0A087X1X7;P29692;P29692-4;E9PK01;P29692-3;E9PQZ1;H0YCK7;E9PI39;E9PQ49;E9PL71;E9PL12;E9PPR1;E9PK06;E9PIZ1;E9PMW7;E9PN91;E9PJD0;E9PK72;E9PKK3;E9PNW6	E9PRY8;P29692-2;A0A087X1X7;P29692;P29692-4;E9PK01;P29692-3;E9PQZ1;H0YCK7;E9PI39;E9PQ49;E9PL71;E9PL12;E9PPR1;E9PK06;E9PIZ1;E9PMW7;E9PN91;E9PJD0;E9PK72;E9PKK3;E9PNW6	Elongation factor 1-delta	EEF1D	22
NaN	0.68022	NaN				1	3.3	27.049	0	0	0	2739100	1648100	1091000	0	0	0	NaN	Q9BUP3;E9PI87;Q9BUP3-2	Q9BUP3;E9PI87;Q9BUP3-2	Oxidoreductase HTATIP2	HTATIP2	3
0.79178	1.1171	0.86429				1	2.2	92.239	558700	385570	173130	1390400	459140	931240	1982800	1335300	647520	NaN	Q9UHI6;E9PJ60	Q9UHI6;E9PJ60	Probable ATP-dependent RNA helicase DDX20	DDX20	2
1.0121	0.99754	0.84542				1	1.8	98.873	25448000	14288000	11160000	517820000	266170000	251640000	533760000	304740000	229020000	NaN	Q9Y6F6-7;Q9Y6F6-9;Q9Y6F6-4;Q9Y6F6-2;Q9Y6F6;H0YI08;Q9Y6F6-5;Q9Y6F6-3;Q9Y6F6-8;Q9Y6F6-6;E9PJ61	Q9Y6F6-7;Q9Y6F6-9;Q9Y6F6-4;Q9Y6F6-2;Q9Y6F6;H0YI08;Q9Y6F6-5;Q9Y6F6-3;Q9Y6F6-8;Q9Y6F6-6;E9PJ61	Protein MRVI1	MRVI1	11
NaN	NaN	1.451				1	3.6	33.698	0	0	0	0	0	0	3256600	1818900	1437600	NaN	Q9NTX5;Q9NTX5-2;Q9NTX5-6;H0Y5L2;Q9NTX5-3;E9PLY6;E9PJS8;Q9NTX5-5;F2Z2D6;E9PRU6;E9PPG7;J3KP84;H0Y525;Q9NTX5-4	Q9NTX5;Q9NTX5-2;Q9NTX5-6;H0Y5L2;Q9NTX5-3;E9PLY6;E9PJS8;Q9NTX5-5;F2Z2D6;E9PRU6;E9PPG7;J3KP84;H0Y525;Q9NTX5-4	Ethylmalonyl-CoA decarboxylase	ECHDC1	14
0.82821	0.6585	NaN				2	2.8	106.12	877250	564400	312850	1595600	986980	608590	0	0	0	NaN	Q9NYF8;Q9NYF8-2;E9PK91;Q9NYF8-3;E9PKI6;E9PQN2;E9PK09;Q9NYF8-4;E9PJA7	Q9NYF8;Q9NYF8-2;E9PK91;Q9NYF8-3;E9PKI6;E9PQN2;E9PK09;Q9NYF8-4;E9PJA7	Bcl-2-associated transcription factor 1	BCLAF1	9
1.3443	1.3125	1.3517				0	23.4	70.897	1417600000	685180000	732470000	893580000	379980000	513600000	1665200000	820450000	844750000	NaN	P11142;E9PKE3;P11142-2;E9PNE6;E9PLF4;E9PK54;E9PQK7;E9PPY6;E9PN89;E9PN25;E9PI65	P11142;E9PKE3;P11142-2;E9PNE6;E9PLF4;E9PK54;E9PQK7;E9PPY6;E9PN89	Heat shock cognate 71 kDa protein	HSPA8	11
1.2009	1.6717	0.99791				3	6.2	46.44	34623000	20221000	14401000	50867000	23880000	26987000	26915000	15055000	11860000	NaN	P50454;E9PKH2	P50454;E9PKH2	Serpin H1	SERPINH1	2
1.1402	1.0079	1.1579				2	2.5	109.44	43173000	23242000	19931000	52916000	24785000	28131000	60946000	33811000	27135000	NaN	Q14697-2;Q14697;E9PKU7;F5H6X6	Q14697-2;Q14697;E9PKU7;F5H6X6	Neutral alpha-glucosidase AB	GANAB	4
1.3992	1.4392	1.4327				5	23.2	28.486	122270000	63078000	59190000	278040000	119840000	158200000	448010000	225910000	222100000	NaN	P23396-2;P23396;E9PL09;H0YEU2;E9PPU1;E9PSF4;H0YCJ7;E9PK82;F2Z2S8;E9PJH4;E9PQ96;E9PQX2	P23396-2;P23396;E9PL09;H0YEU2;E9PPU1;E9PSF4	40S ribosomal protein S3	RPS3	12
0.72317	NaN	NaN				1	1.9	90.069	6303800	3988600	2315200	0	0	0	0	0	0	NaN	P23921;E9PL69	P23921;E9PL69	Ribonucleoside-diphosphate reductase large subunit	RRM1	2
NaN	NaN	NaN				1	19.7	8.2636	0	0	0	0	0	0	0	0	0	NaN	E9PL99	E9PL99		DHDDS	1
NaN	NaN	NaN				1	1.7	78.365	0	0	0	0	0	0	0	0	0	NaN	Q14444;Q14444-2;G3V153;E9PLA9	Q14444;Q14444-2;G3V153;E9PLA9	Caprin-1	CAPRIN1	4
NaN	NaN	NaN				1	4.9	30.692	0	0	0	0	0	0	0	0	0	NaN	Q9BTT0;Q9BTT0-3;E9PLC4;Q5TB19;E9PPH5	Q9BTT0;Q9BTT0-3;E9PLC4;Q5TB19;E9PPH5	Acidic leucine-rich nuclear phosphoprotein 32 family member E	ANP32E	5
0.89283	1.1428	1.0113				3	34.8	22.171	12043000	7241300	4801200	20532000	9876600	10656000	107490000	61831000	45658000	NaN	Q9H0U4;E9PLD0;Q92928	Q9H0U4;E9PLD0;Q92928	Ras-related protein Rab-1B;Putative Ras-related protein Rab-1C	RAB1B;RAB1C	3
1.048	0.98956	0.8675				3	3.7	103.28	13531000	6990700	6539900	20402000	8954800	11447000	18012000	11329000	6683900	NaN	P55786;E9PLK3;P55786-2;A6NEC2;A6NEC2-2;E9PP11;A6NEC2-3;E9PPD4;E9PJY4	P55786;E9PLK3;P55786-2;A6NEC2	Puromycin-sensitive aminopeptidase;Puromycin-sensitive aminopeptidase-like protein	NPEPPS;NPEPPSL1	9
NaN	NaN	NaN				1	8.7	20.332	0	0	0	0	0	0	0	0	0	NaN	O00193;E9PM92;E9PRZ9	O00193;E9PM92;E9PRZ9	Small acidic protein	SMAP;C11orf58	3
NaN	NaN	NaN				1	2.2	50.817	0	0	0	0	0	0	0	0	0	NaN	P49821;G3V0I5;P49821-2;E9PMX3;E9PQP1;E9PPR0;E9PPS5	P49821;G3V0I5;P49821-2;E9PMX3;E9PQP1;E9PPR0;E9PPS5	NADH dehydrogenase [ubiquinone] flavoprotein 1, mitochondrial	NDUFV1	7
0.87711	0.90692	0.74016				1	5.7	23.705	6220400	3818000	2402400	3005900	1547300	1458600	7559000	4842700	2716400	NaN	O00217;E9PPW7;F8W9K7;E9PN51	O00217;E9PPW7;F8W9K7;E9PN51	NADH dehydrogenase [ubiquinone] iron-sulfur protein 8, mitochondrial	NDUFS8	4
0.78798	0.73908	0.55313				1	2.2	86.267	1673200	1059200	613980	4421400	2670200	1751300	2554500	1799000	755460	NaN	P49321-3;P49321;P49321-4;E9PPR5;E9PNB5	P49321-3;P49321;P49321-4;E9PPR5;E9PNB5	Nuclear autoantigenic sperm protein	NASP	5
2.1146	1.8239	1.7054				2	6.2	22.999	1201500	495710	705770	851820	286580	565240	1484000	584360	899610	NaN	J3KNE7;Q16890;E9PPQ1;Q16890-5;E9PNK6;Q16890-2;Q16890-3;Q16890-4;E9PNQ9	J3KNE7;Q16890;E9PPQ1;Q16890-5;E9PNK6;Q16890-2;Q16890-3;Q16890-4;E9PNQ9	Tumor protein D53	TPD52L1	9
0.89327	NaN	1.1112				1	6.2	14.529	6961900	4188400	2773500	0	0	0	7769200	4437700	3331500	NaN	E9PR17;P13987;E9PNW4	E9PR17;P13987;E9PNW4	CD59 glycoprotein	CD59	3
0.89478	NaN	0.82016				1	2.9	38.957	5680600	3269600	2411000	0	0	0	11018000	7036900	3981500	NaN	Q86TE4;Q86TE4-4;E9PP05	Q86TE4;Q86TE4-4;E9PP05	Leucine zipper protein 2	LUZP2	3
0.99949	1.2042	1.0148				1	5.4	37.489	1321600	777440	544120	2496500	1232200	1264300	797880	538420	259460	NaN	Q9UHD1;Q9UHD1-2;E9PPQ5	Q9UHD1;Q9UHD1-2;E9PPQ5	Cysteine and histidine-rich domain-containing protein 1	CHORDC1	3
NaN	NaN	NaN				1	12	14.632	0	0	0	0	0	0	0	0	0	NaN	Q01628;Q01629;P13164;E9PQN9;E9PS44;H7BYV1	Q01628;Q01629;P13164;E9PQN9;E9PS44;H7BYV1	Interferon-induced transmembrane protein 3;Interferon-induced transmembrane protein 2;Interferon-induced transmembrane protein 1	IFITM3;IFITM2;IFITM1	6
NaN	NaN	NaN				1	57.3	18.727	0	0	0	0	0	0	0	0	0	NaN	E9PQQ4	E9PQQ4		HSPA8	1
0.96845	NaN	NaN				1	3.4	46.589	782070	430160	351910	0	0	0	0	0	0	NaN	J3KNQ4;Q9NVD7;E9PS97;Q9NVD7-2	J3KNQ4;Q9NVD7;E9PS97;Q9NVD7-2	Alpha-parvin	PARVA	4
NaN	NaN	NaN				1	7	31.802	0	0	0	0	0	0	0	0	0	NaN	F5GWE5;Q00169;I3L4U7;I3L471	F5GWE5;Q00169;I3L4U7;I3L471	Phosphatidylinositol transfer protein alpha isoform	PITPNA	4
0.89648	0.80761	0.77454				7	14	57.488	46931000	28301000	18631000	60962000	33541000	27421000	42199000	25561000	16638000	NaN	P78371;F5GWF6;F8VQ14;P78371-2	P78371;F5GWF6;F8VQ14;P78371-2	T-complex protein 1 subunit beta	CCT2	4
0.89215	NaN	NaN				1	0.5	299.72	1036300	609990	426270	0	0	0	0	0	0	NaN	Q9H4A3-7;Q9H4A3-6;Q9H4A3-5;Q9H4A3;Q9H4A3-2;F5GWT4;Q9H4A3-4	Q9H4A3-7;Q9H4A3-6;Q9H4A3-5;Q9H4A3;Q9H4A3-2;F5GWT4;Q9H4A3-4	Serine/threonine-protein kinase WNK1	WNK1	7
1.0222	1.016	1.0498				3	10.8	30.239	22251000	13119000	9131800	38839000	19987000	18851000	37949000	22492000	15457000	NaN	P25786-2;P25786;F5GX11	P25786-2;P25786;F5GX11	Proteasome subunit alpha type-1	PSMA1	3
NaN	NaN	NaN				1	4.5	24.682	0	0	0	0	0	0	0	0	0	NaN	O00233;J3KN29;O00233-2;F5GX23;F5H5V4;F5H7X1	O00233;J3KN29;O00233-2;F5GX23;F5H5V4;F5H7X1	26S proteasome non-ATPase regulatory subunit 9	PSMD9	6
0.7926	1.004	0.86928				2	11.1	23.593	10999000	7001600	3997400	11807000	3883700	7922900	25481000	15666000	9815600	NaN	P20340;P20340-2;P20340-3;F5GX61;F5H3K7;Q9NRW1;C9J0I2	P20340;P20340-2;P20340-3;F5GX61;F5H3K7;Q9NRW1;C9J0I2	Ras-related protein Rab-6A;Ras-related protein Rab-6B	RAB6A;RAB6B	7
0.88114	1.469	1.2773				3	8.2	65.102	699670	418800	280870	3910500	1572100	2338400	31677000	15490000	16186000	NaN	Q13740;Q13740-2;F5GXJ9;H7C543;Q13740-4	Q13740;Q13740-2;F5GXJ9;H7C543	CD166 antigen	ALCAM	5
1.2016	1.1307	0.87902				1	10.6	12.074	34391000	18909000	15481000	29207000	14202000	15005000	41211000	27795000	13416000	NaN	F5GXR3;P20962;F5H7R9	F5GXR3;P20962;F5H7R9	Parathymosin	PTMS	3
NaN	1.0012	NaN				1	5.1	30.276	0	0	0	1979200	921510	1057700	0	0	0	NaN	Q9UBW8;F5H248;F5GYF7;F5H7C6;F5H4U8;F5GXT7;G3XAP1;F5H3M6;F5H4Z0	Q9UBW8;F5H248;F5GYF7;F5H7C6;F5H4U8;F5GXT7;G3XAP1;F5H3M6;F5H4Z0	COP9 signalosome complex subunit 7a	COPS7A	9
1.0841	0.87966	1.008				1	4	33.296	79776000	48236000	31540000	160790000	86376000	74417000	97273000	58516000	38757000	NaN	Q99623;J3KPX7;F5GY37	Q99623;J3KPX7;F5GY37	Prohibitin-2	PHB2	3
NaN	1.1289	0.96039				2	1.7	126.97	0	0	0	12626000	6176400	6449500	7039300	4294500	2744800	NaN	Q16531;F5GY55	Q16531;F5GY55	DNA damage-binding protein 1	DDB1	2
NaN	NaN	NaN				1	3.3	44.659	0	0	0	0	0	0	0	0	0	NaN	F5GYQ1;P61421;R4GN72;J3QL14	F5GYQ1;P61421;R4GN72;J3QL14	V-type proton ATPase subunit d 1	ATP6V0D1	4
NaN	1.0055	NaN				1	1.6	56.374	0	0	0	8591700	4021300	4570400	0	0	0	NaN	Q8N684-3;Q8N684;Q8N684-2;F5H669;F5H047;F5H6M0;J3QT54	Q8N684-3;Q8N684;Q8N684-2;F5H669;F5H047;F5H6M0;J3QT54	Cleavage and polyadenylation specificity factor subunit 7	CPSF7	7
1.0118	NaN	0.97326	+			1	0.9	84.025	26815	13238	13577	0	0	0	36218	20783	15435	NaN	P35711;P35711-5;P35711-2;F5H0I3;P35711-4;P35711-3	P35711;P35711-5;P35711-2;F5H0I3;P35711-4;P35711-3	Transcription factor SOX-5	SOX5	6
3.9013	0.50756	NaN				2	1.8	162.24	6066000	948830	5117100	3181000	2105800	1075200	0	0	0	NaN	P30622;P30622-1;P30622-2;J3KP58;F5H0N7	P30622;P30622-1;P30622-2;J3KP58;F5H0N7	CAP-Gly domain-containing linker protein 1	CLIP1	5
NaN	NaN	NaN				1	1.9	91.88	0	0	0	0	0	0	0	0	0	NaN	Q12929;F5H0R8	Q12929;F5H0R8	Epidermal growth factor receptor kinase substrate 8	EPS8	2
0.81665	0.96181	0.87465				3	3.9	110.61	28961000	16522000	12439000	60058000	32848000	27210000	59751000	35978000	23774000	NaN	F5H2F4;P11586;V9GYY3	F5H2F4;P11586;V9GYY3	C-1-tetrahydrofolate synthase, cytoplasmic;Methylenetetrahydrofolate dehydrogenase;Methenyltetrahydrofolate cyclohydrolase;Formyltetrahydrofolate synthetase	MTHFD1	3
NaN	1.2912	NaN				1	1.5	73.457	0	0	0	2330100	1059700	1270400	0	0	0	NaN	P46063;F8WD97;F8WA66;F5H2L2;F5H3W0;F5H4P4	P46063;F8WD97;F8WA66;F5H2L2;F5H3W0;F5H4P4	ATP-dependent DNA helicase Q1	RECQL	6
NaN	NaN	1.0705				1	1.3	128.3	0	0	0	0	0	0	1069900	584820	485040	NaN	Q93009;Q93009-3;H3BND8;F5H2X1	Q93009;Q93009-3;H3BND8;F5H2X1	Ubiquitin carboxyl-terminal hydrolase 7;Ubiquitin carboxyl-terminal hydrolase	USP7	4
NaN	NaN	NaN				1	1.6	48.086	0	0	0	0	0	0	0	0	0	NaN	F5H699	F5H699		ADCY7	1
0.95937	0.93767	1.0064				2	2.4	121.68	21037000	12278000	8758800	22047000	11800000	10247000	22149000	12685000	9464700	NaN	O00159;O00159-3;F5H6E2;O00159-2;I3L204	O00159;O00159-3;F5H6E2;O00159-2;I3L204	Unconventional myosin-Ic	MYO1C	5
1.1898	0.94737	0.86392				2	5.5	60.541	7283500	3725900	3557600	15034000	7015300	8019000	29380000	16734000	12646000	NaN	Q6DD88;F5H6I7	Q6DD88;F5H6I7	Atlastin-3	ATL3	2
1.0678	1.5529	0.96233				3	12.9	32.301	8711300	5272400	3438900	14957000	3963300	10993000	9550600	5316100	4234500	NaN	F5H6Q1;J3KR44;Q96FW1;F5GYJ8;F5GYN4;F5H3F0;Q96FW1-2	F5H6Q1;J3KR44;Q96FW1;F5GYJ8;F5GYN4;F5H3F0	Ubiquitin thioesterase OTUB1	OTUB1	7
1.1846	NaN	NaN				1	3.3	45.376	2408700	1254600	1154100	0	0	0	0	0	0	NaN	P61160-2;P61160;F5H6T1	P61160-2;P61160;F5H6T1	Actin-related protein 2	ACTR2	3
NaN	1.2494	NaN				1	8.4	17.598	0	0	0	5912000	2827700	3084300	0	0	0	NaN	P10620;P10620-2;F5H6X2;F5H7F6	P10620;P10620-2;F5H6X2;F5H7F6	Microsomal glutathione S-transferase 1	MGST1	4
NaN	1.0964	NaN				2	11.3	23.934	0	0	0	2522500	1236000	1286600	0	0	0	NaN	Q96GC5;Q96GC5-3;F5H702;F5H8D0	Q96GC5;Q96GC5-3;F5H702;F5H8D0	39S ribosomal protein L48, mitochondrial	MRPL48	4
NaN	1.0141	NaN				1	2.7	37.238	0	0	0	3703900	1785900	1918000	0	0	0	NaN	O43414;F6UGJ8;O43414-2;H0Y4B0;F6QUN3;O43414-3	O43414;F6UGJ8;O43414-2;H0Y4B0;F6QUN3;O43414-3	ERI1 exoribonuclease 3	ERI3	6
1.6366	0.8715	0.91902				2	14.5	18.506	48483000	28335000	20148000	42609000	22262000	20347000	46902000	27442000	19459000	NaN	P60981;P60981-2;F6RFD5	P60981;P60981-2;F6RFD5	Destrin	DSTN	3
1.0513	1.2211	1.2369				3	7	54.719	48012000	27101000	20912000	66313000	30247000	36066000	43429000	24207000	19221000	NaN	F6TLX2;Q9HC38;Q9HC38-2;I3L3Q4;Q9HC38-3;I3L1I0	F6TLX2;Q9HC38;Q9HC38-2;I3L3Q4;Q9HC38-3	Glyoxalase domain-containing protein 4	GLOD4	6
1.2039	1.1983	1.1806				2	5.6	32.596	12062000	6188000	5874300	36402000	14952000	21450000	22503000	11624000	10880000	NaN	S4R435;Q9NQ39;F6U211;P46783	S4R435;Q9NQ39;F6U211;P46783	Putative 40S ribosomal protein S10-like;40S ribosomal protein S10	RPS10P5;RPS10	4
0.7079	0.80386	0.70597				1	5.5	17.114	932610	579510	353100	1494900	849940	644980	1245600	824090	421480	NaN	Q9UI09;F8VRD8;Q9UI09-2;F8VXI1	Q9UI09;F8VRD8;Q9UI09-2;F8VXI1	NADH dehydrogenase [ubiquinone] 1 alpha subcomplex subunit 12	NDUFA12	4
NaN	NaN	1.3367				1	3.6	41.018	0	0	0	0	0	0	1631100	841880	789250	NaN	Q12792-3;Q12792;F8VRG3	Q12792-3;Q12792;F8VRG3	Twinfilin-1	TWF1	3
19.671	15.138	15.21				1	4.2	24.105	143920000	10619000	133300000	180210000	11866000	168340000	262200000	21982000	240220000	NaN	F8VZQ9;P82979;F8VS12	F8VZQ9;P82979;F8VS12	SAP domain-containing ribonucleoprotein	SARNP	3
0.65379	0.67841	0.54305				1	3.2	38.746	7345300	4850700	2494600	6847000	2951900	3895100	889180	594860	294330	NaN	P09651;P09651-2;F8W6I7;P09651-3;F8W646;F8VTQ5	P09651;P09651-2;F8W6I7;P09651-3;F8W646;F8VTQ5	Heterogeneous nuclear ribonucleoprotein A1	HNRNPA1	6
0.81019	NaN	NaN				1	0.6	241.64	1846400	1311100	535310	0	0	0	0	0	0	NaN	P49750-4;P49750;P49750-3;F8VU51	P49750-4;P49750;P49750-3;F8VU51	YLP motif-containing protein 1	YLPM1	4
1.3627	1.3013	1.4051				1	6.8	21.728	6898300	3247800	3650500	9127200	4311000	4816200	9286600	4938600	4347900	NaN	J3QQ67;Q07020;H0YHA7;G3V203;Q07020-2;F8VUA6	J3QQ67;Q07020;H0YHA7;G3V203;Q07020-2;F8VUA6	60S ribosomal protein L18	RPL18	6
0.73687	0.81941	0.61539				1	5.1	22.34	11517000	7345400	4171800	16269000	8561200	7707600	10549000	7286400	3263000	NaN	F8VVA7;P61923-4;P61923;F8VYZ4;P61923-5;F8VXR1;F8W156;F8VUC5;F8VXB1	F8VVA7;P61923-4;P61923;F8VYZ4;P61923-5;F8VXR1;F8W156;F8VUC5;F8VXB1	Coatomer subunit zeta-1	COPZ1	9
NaN	NaN	NaN				1	22	30.906	0	0	0	0	0	0	0	0	0	NaN	F8VUG2	F8VUG2		KRT8	1
NaN	NaN	1.1939				1	1.7	109.93	0	0	0	0	0	0	4418200	2478400	1939800	NaN	Q15020;Q15020-4;F8VV04;Q15020-2;F8W667;Q15020-3	Q15020;Q15020-4;F8VV04;Q15020-2;F8W667;Q15020-3	Squamous cell carcinoma antigen recognized by T-cells 3	SART3	6
1.0834	NaN	1.1968				2	10.1	22.092	3300400	1888800	1411600	0	0	0	13563000	7614800	5948200	NaN	O43583;F8VVL1	O43583;F8VVL1	Density-regulated protein	DENR	2
1.0314	NaN	NaN				1	4.7	44.819	5799700	3208100	2591600	0	0	0	0	0	0	NaN	Q13561-2;Q13561-3;Q13561;F8W1I6;F8VW18;H0YI98	Q13561-2;Q13561-3;Q13561;F8W1I6;F8VW18;H0YI98	Dynactin subunit 2	DCTN2	6
1.2372	1.2047	1.1726				4	21.1	34.273	162650000	84486000	78163000	153900000	70761000	83134000	273490000	142980000	130510000	NaN	P05388;F8VWS0;P05388-2;Q8NHW5;F8VU65;G3V210;F8VZS0;F8VW21;F8VRK7;F8VPE8;F8VQY6;F8VS58;F8VWV4;F8W1K8	P05388;F8VWS0;P05388-2;Q8NHW5;F8VU65;G3V210;F8VZS0;F8VW21;F8VRK7;F8VPE8;F8VQY6;F8VS58	60S acidic ribosomal protein P0;60S acidic ribosomal protein P0-like	RPLP0;RPLP0P6	14
NaN	NaN	NaN				1	6.1	23.98	0	0	0	0	0	0	0	0	0	NaN	F8VXU5;Q9UBQ0-2;Q9UBQ0	F8VXU5;Q9UBQ0-2;Q9UBQ0	Vacuolar protein sorting-associated protein 29	VPS29	3
NaN	NaN	NaN	+			1	3.3	51.777	0	0	0	0	0	0	0	0	0	NaN	Q9BVA6;J3KP49;F8VZ74	Q9BVA6;J3KP49;F8VZ74	Adenosine monophosphate-protein transferase FICD	FICD	3
1.107	1.1763	1.1622				1	3	34.674	578270	321160	257110	1512700	674560	838190	741240	398190	343040	NaN	Q96GA7;F8VZ97	Q96GA7;F8VZ97	Serine dehydratase-like	SDSL	2
0.85032	0.70842	0.91219				2	10.9	26.477	553110	355290	197820	3881800	2464300	1417400	28499000	17404000	11095000	NaN	P54819;F8W1A4;P54819-2;P54819-5;P54819-3;F8VZG5;G3V213;P54819-6;F8VY04;P54819-4;F8VPP1	P54819;F8W1A4;P54819-2;P54819-5;P54819-3;F8VZG5;G3V213;P54819-6;F8VY04;P54819-4;F8VPP1	Adenylate kinase 2, mitochondrial	AK2	11
NaN	1.1837	1.102				1	4.4	48.057	0	0	0	2926600	1242900	1683700	3738800	1892200	1846600	NaN	P05783;F8VZY9	P05783;F8VZY9	Keratin, type I cytoskeletal 18	KRT18	2
0.64306	0.66514	NaN				3	25.8	24.767	3006000	2082900	923060	6448000	3884100	2563900	0	0	0	NaN	H0YIS7;Q8IXM2-3;Q8IXM2;F8W038;Q8IXM2-2;F8W1H0	H0YIS7;Q8IXM2-3;Q8IXM2;F8W038;Q8IXM2-2;F8W1H0	Chromatin complexes subunit BAP18	C17orf49;BAP18	6
NaN	0.77184	NaN				1	7.5	18.037	0	0	0	1484900	912140	572790	0	0	0	NaN	G3V1V0;P60660;P60660-2;F8W1R7;G3V1Y7	G3V1V0;P60660;P60660-2;F8W1R7;G3V1Y7	Myosin light polypeptide 6	MYL6	5
NaN	1.2672	NaN				2	3.4	116.64	0	0	0	2538400	1020600	1517800	0	0	0	NaN	Q14157-5;Q14157;F8W726;Q14157-3;Q14157-1;Q14157-4	Q14157-5;Q14157;F8W726;Q14157-3;Q14157-1;Q14157-4	Ubiquitin-associated protein 2-like	UBAP2L	6
NaN	NaN	NaN				1	4.2	89.425	0	0	0	0	0	0	0	0	0	NaN	O14782;F8WER6;F8WAR6	O14782;F8WER6;F8WAR6	Kinesin-like protein KIF3C	KIF3C	3
0.61717	0.81002	0.68166				1	2.7	54.862	2661500	1836500	824960	2646200	1395000	1251200	4738700	3188600	1550000	NaN	O94888;F8WB69	O94888;F8WB69	UBX domain-containing protein 7	UBXN7	2
NaN	NaN	NaN				1	3.5	32.854	0	0	0	0	0	0	0	0	0	NaN	O95456;O95456-2;F8WBH7	O95456;O95456-2;F8WBH7	Proteasome assembly chaperone 1	PSMG1	3
0.90852	0.77789	0.92415				3	16	20.762	38460000	21941000	16519000	79856000	44269000	35587000	36180000	20842000	15338000	NaN	H0Y7A7;E7ETZ0;P0DP23;P0DP24;P0DP25;G3V479;M0QZ52;F8WBR5;E7EMB3;P27482	H0Y7A7;E7ETZ0;P0DP23;P0DP24;P0DP25;G3V479;M0QZ52;F8WBR5;E7EMB3		CALM2;CALM1	10
1.0878	NaN	NaN				1	2.5	43.164	6460200	3893900	2566300	0	0	0	0	0	0	NaN	Q8NC42;F8WCD0	Q8NC42;F8WCD0	E3 ubiquitin-protein ligase RNF149	RNF149	2
0.098219	0.0027653	NaN				1	0.9	123.15	27695000	27070000	624900	271380000	270740000	639000	0	0	0	NaN	P82094-2;P82094;F8WF45	P82094-2;P82094;F8WF45	TATA element modulatory factor	TMF1	3
NaN	NaN	1.0637				1	5.4	30.608	0	0	0	0	0	0	2436700	1470600	966110	NaN	Q9NQR4;H7C579;F8WF70	Q9NQR4;H7C579;F8WF70	Omega-amidase NIT2	NIT2	3
0.69607	0.82401	0.8665				2	16.6	16.363	3890700	2747700	1143000	5218700	2995900	2222800	2625400	1658300	967090	NaN	Q15819;H0YBP9;G3V113;I3L0A0;Q13404-1;Q13404-2;Q13404-7;Q13404;G3V2F7;Q13404-8;A0A0A0MSL3;Q13404-6	Q15819;H0YBP9;G3V113;I3L0A0;Q13404-1;Q13404-2;Q13404-7;Q13404;G3V2F7;Q13404-8;A0A0A0MSL3;Q13404-6	Ubiquitin-conjugating enzyme E2 variant 2;Ubiquitin-conjugating enzyme E2 variant 1	UBE2V2;UBE2V1;TMEM189	12
0.79309	0.89799	NaN				1	7.6	22.284	2646600	1660400	986210	4203700	2146000	2057700	0	0	0	NaN	Q9BUR5;Q9BUR5-2;H7C1U8;G3V1B6	Q9BUR5;Q9BUR5-2;H7C1U8;G3V1B6	Apolipoprotein O	APOO	4
1.4145	1.5199	1.2685				1	3.6	41.806	1116700	531550	585140	1056600	408290	648340	3651300	1899400	1751900	NaN	Q9BRK5;Q9BRK5-6;Q9BRK5-2;G3V1E2;Q9BRK5-3;H0Y3T6;Q9BRK5-4	Q9BRK5;Q9BRK5-6;Q9BRK5-2;G3V1E2;Q9BRK5-3;H0Y3T6;Q9BRK5-4	45 kDa calcium-binding protein	SDF4	7
NaN	1.245	NaN				2	4.4	70.311	0	0	0	15934000	7687800	8246300	0	0	0	NaN	O14975;O14975-2;G3V1R7	O14975;O14975-2;G3V1R7	Very long-chain acyl-CoA synthetase	SLC27A2	3
NaN	NaN	NaN				1	5	35.386	0	0	0	0	0	0	0	0	0	NaN	Q8TC12;Q8TC12-2;Q8TC12-3;G3V234;G3V2G6	Q8TC12;Q8TC12-2;Q8TC12-3;G3V234;G3V2G6	Retinol dehydrogenase 11	RDH11	5
1.0066	1.0874	0.68233				1	4	28.147	16748000	10589000	6159500	25573000	13513000	12060000	15210000	9641700	5568300	NaN	G3V5Z7;P60900;P60900-2;G3V295;P60900-3	G3V5Z7;P60900;P60900-2;G3V295;P60900-3	Proteasome subunit alpha type;Proteasome subunit alpha type-6	PSMA6	5
NaN	NaN	NaN				1	2.4	54.392	0	0	0	0	0	0	0	0	0	NaN	Q96HE7;G3V2H0	Q96HE7;G3V2H0	ERO1-like protein alpha	ERO1L	2
1.0483	1.1529	1.2401				1	5.5	24.976	51334000	27952000	23381000	120200000	52880000	67320000	76821000	40157000	36663000	NaN	P49755;G3V2K7	P49755;G3V2K7	Transmembrane emp24 domain-containing protein 10	TMED10	2
NaN	NaN	NaN				1	4.8	28.476	0	0	0	0	0	0	0	0	0	NaN	Q9BQ24-2;Q9BQ24;G3V2M2;G3V5D6	Q9BQ24-2;Q9BQ24;G3V2M2;G3V5D6	Zinc finger FYVE domain-containing protein 21	ZFYVE21	4
0.93036	0.65911	0.95175				1	0.8	163.71	73756000	43862000	29894000	152000000	81518000	70479000	158410000	96066000	62341000	NaN	Q9UHC1;Q9UHC1-2;G3V419	Q9UHC1;Q9UHC1-2;G3V419	DNA mismatch repair protein Mlh3	MLH3	3
1.0318	1.0355	1.0365				3	23.3	17.512	13786000	7249100	6536500	16760000	7954700	8804800	9660200	5690400	3969700	NaN	G3V4P8;P60983;G3V3X4	G3V4P8;P60983	Glia maturation factor beta	GMFB	3
0.70957	NaN	1.0691				2	9.5	49.184	2815000	1793600	1021400	0	0	0	5249100	3276000	1973100	NaN	P62191;P62191-2;G3V4X1	P62191;P62191-2;G3V4X1	26S protease regulatory subunit 4	PSMC1	3
NaN	0.80534	0.99563				2	9.4	28.433	0	0	0	325820	197070	128760	10351000	6109000	4241900	NaN	P25788;P25788-2;G3V4X5;H0YJ03	P25788;P25788-2;G3V4X5;H0YJ03	Proteasome subunit alpha type-3	PSMA3	4
0.74054	0.62161	NaN				2	3.6	96.331	451180	261770	189410	1288900	838290	450640	0	0	0	NaN	Q9GZR7;G3V529;Q9GZR7-2;F5GYL3;A0A087WXU8	Q9GZR7;G3V529;Q9GZR7-2;F5GYL3;A0A087WXU8	ATP-dependent RNA helicase DDX24	DDX24	5
0.79172	1.0209	1.0074				1	2.7	66.136	1008600	638870	369760	376390	183290	193090	2737700	1498100	1239500	NaN	O75909-4;O75909;G3V5E1;O75909-1	O75909-4;O75909;G3V5E1;O75909-1	Cyclin-K	CCNK	4
1.3465	1.0833	NaN				1	5.2	26.688	2866000	1411100	1454900	3958400	1962300	1996200	0	0	0	NaN	Q9UEU0;G3V5I2;J3KMW2	Q9UEU0;G3V5I2;J3KMW2	Vesicle transport through interaction with t-SNAREs homolog 1B	VTI1B	3
NaN	1.4881	NaN				2	1.7	200.48	0	0	0	1407800	606050	801700	0	0	0	NaN	G3XAI2;P07942	G3XAI2;P07942	Laminin subunit beta-1	LAMB1	2
1.3103	0.53496	NaN				1	1.7	75.491	11193000	6889300	4303600	7397300	5231200	2166200	0	0	0	NaN	P42166;P42167;G5E972;P42167-2;P42167-3	P42166;P42167;G5E972;P42167-2;P42167-3	Lamina-associated polypeptide 2, isoform alpha;Thymopoietin;Thymopentin;Lamina-associated polypeptide 2, isoforms beta/gamma;Thymopoietin;Thymopentin	TMPO	5
1.7842	3.0852	1.5779				1	1.8	66.99	13355000	2688500	10666000	16420000	3562300	12858000	19273000	2969500	16303000	NaN	Q5VW38;G5E994;Q5VW38-2;Q5VW38-3	Q5VW38;G5E994;Q5VW38-2;Q5VW38-3	Protein GPR107	GPR107	4
1.199	1.1445	1.1074				1	1.4	118.32	13473000	7358500	6114700	6460000	3051000	3409000	15136000	8188000	6948000	NaN	P53992;G5EA31	P53992;G5EA31	Protein transport protein Sec24C	SEC24C	2
0.79723	NaN	0.75722				1	1.3	81.537	7454500	4462500	2992000	0	0	0	13052000	8169400	4882300	NaN	P16070;P16070-5;P16070-7;P16070-3;P16070-4;P16070-6;P16070-17;P16070-8;P16070-16;P16070-10;P16070-11;P16070-13;P16070-14;P16070-12;P16070-18;H0Y2P0;H0YD13;H0YE40	P16070;P16070-5;P16070-7;P16070-3;P16070-4;P16070-6;P16070-17;P16070-8;P16070-16;P16070-10;P16070-11;P16070-13;P16070-14;P16070-12;P16070-18;H0Y2P0;H0YD13;H0YE40	CD44 antigen	CD44	18
0.88325	0.84726	0.82254				2	4.5	61.277	41213000	24916000	16297000	25682000	13740000	11942000	54643000	33132000	21511000	NaN	Q15942;H0Y2Y8;Q15942-2;H7C3D3;C9IZ41	Q15942;H0Y2Y8;Q15942-2;H7C3D3;C9IZ41	Zyxin	ZYX	5
NaN	NaN	NaN				1	3.7	33.218	0	0	0	0	0	0	0	0	0	NaN	H0Y368;Q5QPK2;O60762	H0Y368;Q5QPK2;O60762	Dolichol-phosphate mannosyltransferase	DPM1	3
0.87354	0.89194	0.85582				1	1.5	61.386	13363000	8223800	5138800	11584000	6363900	5220000	25988000	16087000	9900400	NaN	J3QRU1;P07947;P12931-2;P06241;P12931;P06241-2;J3KPD6;P08631;H0Y3C5;P08631-4;P07948;P08631-2;P08631-3;P07948-2;P06241-3	J3QRU1;P07947;P12931-2;P06241;P12931;P06241-2;J3KPD6;P08631;H0Y3C5;P08631-4;P07948;P08631-2;P08631-3;P07948-2;P06241-3	Tyrosine-protein kinase Yes;Tyrosine-protein kinase Fyn;Proto-oncogene tyrosine-protein kinase Src;Tyrosine-protein kinase HCK;Tyrosine-protein kinase Lyn	YES1;FYN;SRC;HCK;LYN	15
NaN	0.56855	NaN				1	2.7	85.595	0	0	0	1923300	1278800	644500	0	0	0	NaN	Q01813;Q01813-2;H0Y3Y3	Q01813;Q01813-2;H0Y3Y3	6-phosphofructokinase type C	PFKP	3
1.1107	1.2047	1.1332				2	10.4	41.905	54153000	30393000	23759000	51025000	24716000	26309000	49180000	27849000	21331000	NaN	H0Y449;P67809	H0Y449;P67809	Nuclease-sensitive element-binding protein 1	YBX1	2
NaN	0.91766	NaN				1	5.2	23.411	0	0	0	3516200	1839800	1676400	0	0	0	NaN	Q5T9B7;P00568;H0Y4J6	Q5T9B7;P00568;H0Y4J6	Adenylate kinase isoenzyme 1	AK1	3
NaN	0.9432	NaN				2	6.8	55.804	0	0	0	13465000	6609800	6855500	0	0	0	NaN	P12268;H0Y4R1;E7ETK5	P12268;H0Y4R1;E7ETK5	Inosine-5-monophosphate dehydrogenase 2	IMPDH2	3
0.97131	1.1442	1.0898				2	4.6	96.695	27610000	15939000	11671000	47085000	20961000	26124000	52882000	29847000	23035000	NaN	P11216;H0Y4Z6	P11216;H0Y4Z6	Glycogen phosphorylase, brain form;Phosphorylase	PYGB	2
0.92709	0.93168	0.88873				1	2.2	46.48	27447000	16892000	10555000	14239000	7322500	6916500	16391000	9840300	6550300	NaN	Q9HDC9;H0Y512;Q9HDC9-2	Q9HDC9;H0Y512;Q9HDC9-2	Adipocyte plasma membrane-associated protein	APMAP;C20orf3	3
NaN	NaN	NaN				1	4.2	50.24	0	0	0	0	0	0	0	0	0	NaN	Q9NR50;Q9NR50-2;Q9NR50-3;H0Y580	Q9NR50;Q9NR50-2;Q9NR50-3;H0Y580	Translation initiation factor eIF-2B subunit gamma	EIF2B3	4
NaN	0.759	NaN				1	3	69.283	0	0	0	1333400	854030	479350	0	0	0	NaN	P04844;P04844-2;H0Y5M1;Q5JYR3	P04844;P04844-2;H0Y5M1;Q5JYR3	Dolichyl-diphosphooligosaccharide--protein glycosyltransferase subunit 2	RPN2	4
0.032738	NaN	NaN				1	0.5	213.86	95010000	94137000	873060	0	0	0	0	0	0	NaN	Q96MT7-2;H0Y853	Q96MT7-2;H0Y853		WDR52	2
1.239	1.2808	0.72327				4	12	35.076	49718000	27202000	22516000	157530000	77212000	80319000	167750000	108550000	59203000	NaN	P63244;H0Y8W2;J3KPE3;H0YAM7;H0YAF8;D6REE5;D6RAC2;D6R9L0;D6R9Z1;D6RFX4;D6RF23;H0Y9P0;D6RHH4;D6RFZ9;D6RBD0;E9PD14;D6RAU2;H0Y8R5	P63244;H0Y8W2;J3KPE3;H0YAM7;H0YAF8;D6REE5;D6RAC2;D6R9L0;D6R9Z1;D6RFX4;D6RF23;H0Y9P0	Guanine nucleotide-binding protein subunit beta-2-like 1	GNB2L1	18
NaN	1.8617	1.5132				1	2	63.111	0	0	0	15376000	6214800	9160800	6829400	3318300	3511000	NaN	P07686;Q5URX0;H0Y9B6;H0YA83	P07686;Q5URX0;H0Y9B6;H0YA83	Beta-hexosaminidase subunit beta;Beta-hexosaminidase subunit beta chain B;Beta-hexosaminidase subunit beta chain A	HEXB	4
NaN	NaN	NaN				1	7.1	17.541	0	0	0	0	0	0	0	0	0	NaN	H0Y9L2	H0Y9L2		SLAIN2	1
1.8692	1.7317	1.667				1	5.8	41.937	1218300	495200	723090	2041000	722940	1318100	1418000	614300	803680	NaN	P48729-2;P48729;U3KQK7;H0Y9X2;U3KPX3;U3KQ83	P48729-2;P48729;U3KQK7;H0Y9X2;U3KPX3;U3KQ83	Casein kinase I isoform alpha	CSNK1A1	6
0.72797	0.90785	0.93797				3	15.1	31.17	19893000	10030000	9862900	52163000	28848000	23315000	11146000	6643300	4502700	NaN	H0YC42;P55327-3;P55327-6;P55327-5;P55327-7;P55327;P55327-4;P55327-2;P55327-8;H0YC44;E5RFR7	H0YC42;P55327-3;P55327-6;P55327-5;P55327-7;P55327;P55327-4;P55327-2	Tumor protein D52	MRPS28;TPD52	11
2.3685	1.4434	7.1458				1	0.9	141.4	900060	402340	497720	967440	381740	585700	700310	257910	442400	NaN	Q9ULD2;Q9ULD2-2;Q9ULD2-5;H0YC63	Q9ULD2;Q9ULD2-2;Q9ULD2-5;H0YC63	Microtubule-associated tumor suppressor 1	MTUS1	4
0.47412	0.47035	0.55542				3	3.3	140.84	14794000	10883000	3910900	27887000	19128000	8759100	8397000	6206100	2190900	NaN	P55265-4;P55265;P55265-2;H0YCK3;P55265-3;P55265-5	P55265-4;P55265;P55265-2;H0YCK3;P55265-3;P55265-5	Double-stranded RNA-specific adenosine deaminase	ADAR	6
1.1143	NaN	1.0068				1	2.1	58.946	8788900	5155200	3633700	0	0	0	18565000	10613000	7952200	NaN	Q3LXA3;Q3LXA3-2;H0YCY6;I3L252	Q3LXA3;Q3LXA3-2;H0YCY6;I3L252	Bifunctional ATP-dependent dihydroxyacetone kinase/FAD-AMP lyase (cyclizing);ATP-dependent dihydroxyacetone kinase;FAD-AMP lyase (cyclizing)	DAK	4
NaN	NaN	NaN				1	6.6	22.231	0	0	0	0	0	0	0	0	0	NaN	H0YD16	H0YD16		TOR1AIP1	1
NaN	1.074	NaN				1	1.8	54.122	0	0	0	1251400	594090	657300	0	0	0	NaN	O00330;O00330-3;H0YD97	O00330;O00330-3;H0YD97	Pyruvate dehydrogenase protein X component, mitochondrial	PDHX	3
NaN	NaN	NaN				1	4.3	31.585	0	0	0	0	0	0	0	0	0	NaN	O14893;O14893-2;O14893-3;H0YEL0;H0YDP6	O14893;O14893-2;O14893-3;H0YEL0;H0YDP6	Gem-associated protein 2	GEMIN2	5
0.84971	NaN	NaN				1	4.8	19.198	2406900	1483600	923300	0	0	0	0	0	0	NaN	Q13405;H0YDP7	Q13405;H0YDP7	39S ribosomal protein L49, mitochondrial	MRPL49	2
0.33778	NaN	NaN	+			1	0.8	148.04	15568000	8433600	7134800	0	0	0	0	0	0	NaN	Q502W6-6;Q502W6;Q502W6-8;H0YEM4;Q502W6-5;Q502W6-7;Q502W6-3;Q502W6-4;H0YDS6	Q502W6-6;Q502W6;Q502W6-8;H0YEM4;Q502W6-5;Q502W6-7;Q502W6-3;Q502W6-4;H0YDS6	von Willebrand factor A domain-containing protein 3B	VWA3B	9
1.2897	1.4408	3.2084				1	9.4	47.655	14830000	7771400	7058500	29128000	11925000	17203000	12936000	5671600	7264000	NaN	Q09028;Q09028-2;Q09028-3;Q09028-4;H0YF10;H0YDK2;H0YCT5;H0YEU5	Q09028;Q09028-2;Q09028-3;Q09028-4;H0YF10;H0YDK2;H0YCT5;H0YEU5	Histone-binding protein RBBP4	RBBP4	8
NaN	NaN	NaN				1	6.7	30.221	0	0	0	0	0	0	0	0	0	NaN	P52943-2;P52943;H0YFA4;H0YHD8	P52943-2;P52943;H0YFA4;H0YHD8	Cysteine-rich protein 2	CRIP2	4
0.87198	0.83495	0.882				1	8.3	20.601	38166000	22609000	15556000	64237000	33518000	30720000	29825000	17456000	12369000	NaN	P61204;P84077;P61204-2;H0YGG7	P61204;P84077;P61204-2;H0YGG7	ADP-ribosylation factor 3;ADP-ribosylation factor 1	ARF3;ARF1	4
NaN	NaN	0.5475				1	0.7	258.67	0	0	0	0	0	0	332740	250050	82694	NaN	Q96RV3;Q96RV3-3;Q96RV3-4;H0YJ91	Q96RV3;Q96RV3-3;Q96RV3-4;H0YJ91	Pecanex-like protein 1	PCNX	4
NaN	NaN	1.0493				1	3.8	28.48	0	0	0	0	0	0	14076000	7592200	6483400	NaN	P28074;P28074-2;P28074-3;H0YJM8	P28074;P28074-2;P28074-3;H0YJM8	Proteasome subunit beta type-5	PSMB5	4
0.96349	0.92653	0.89468				1	4.2	38.324	1648700	1016400	632300	17403000	9156700	8246100	1673700	999140	674610	NaN	Q00796;H0YLA4;H0YKB3;Q00796-2	Q00796;H0YLA4;H0YKB3;Q00796-2	Sorbitol dehydrogenase	SORD	4
1.2431	1.1847	1.2184				3	17.1	19.072	174800000	88162000	86640000	88646000	37775000	50871000	51321000	26263000	25058000	NaN	H0YKD8;P46779-3;P46779-2;P46779;H0YMF4;P46779-5;P46779-4;H0YLP6	H0YKD8;P46779-3;P46779-2;P46779;H0YMF4;P46779-5;P46779-4;H0YLP6	60S ribosomal protein L28	RPL28	8
NaN	NaN	NaN				1	7.1	26.563	0	0	0	0	0	0	0	0	0	NaN	P33316;H0YKI0	P33316;H0YKI0	Deoxyuridine 5-triphosphate nucleotidohydrolase, mitochondrial	DUT	2
1.1254	0.97031	1.2074				1	3.1	29.483	25884000	14639000	11245000	83274000	43201000	40074000	22641000	12909000	9731200	NaN	P25789;H0YL69;H0YN18;H0YMZ1;H0YMA1;P25789-2;H0YMI6;H0YKT8;H0YKS0	P25789;H0YL69;H0YN18;H0YMZ1;H0YMA1;P25789-2;H0YMI6;H0YKT8;H0YKS0	Proteasome subunit alpha type-4;Proteasome subunit alpha type;Proteasome subunit beta type	PSMA4	9
NaN	0.93506	NaN				1	4.7	28.415	0	0	0	10885000	6327100	4558300	0	0	0	NaN	P09661;H0YMA0;H0YLR3	P09661;H0YMA0;H0YLR3	U2 small nuclear ribonucleoprotein A	SNRPA1	3
NaN	NaN	NaN				1	2	88.255	0	0	0	0	0	0	0	0	0	NaN	Q16666;Q16666-2;Q16666-6;Q16666-3;X6RHM1;H3BM18	Q16666;Q16666-2;Q16666-6;Q16666-3;X6RHM1;H3BM18	Gamma-interferon-inducible protein 16	IFI16	6
1.041	NaN	NaN				1	4.4	23.255	4791700	2891900	1899900	0	0	0	0	0	0	NaN	P49914;H3BN04	P49914;H3BN04	5-formyltetrahydrofolate cyclo-ligase	MTHFS	2
NaN	0.68383	NaN				2	4.8	88.761	0	0	0	8996100	5205400	3790700	0	0	0	NaN	H3BND4;Q6P996;Q6P996-5;Q6P996-4;Q6P996-3;Q86XE2;Q6P996-2;J3KNK7;Q6XYB5	H3BND4;Q6P996;Q6P996-5;Q6P996-4;Q6P996-3;Q86XE2;Q6P996-2;J3KNK7;Q6XYB5	Pyridoxal-dependent decarboxylase domain-containing protein 1	PDXDC1	9
NaN	0.86499	NaN				1	1.2	72.333	0	0	0	6582700	3336300	3246400	0	0	0	NaN	Q9BVA0;H3BPK1;H3BPD8	Q9BVA0;H3BPK1;H3BPD8	Katanin p80 WD40-containing subunit B1	KATNB1	3
NaN	1.2565	0.71541				2	14.2	19.576	0	0	0	2517700	1204800	1312900	10460000	6756200	3703900	NaN	P13073;H3BPG0;H3BNV9;H3BN72;Q86WV2	P13073;H3BPG0;H3BNV9;H3BN72;Q86WV2	Cytochrome c oxidase subunit 4 isoform 1, mitochondrial	COX4I1	5
2.5373	0.55993	0.62311				2	9.3	28.082	18294000	11268000	7025300	203430000	133570000	69859000	54366000	36087000	18279000	NaN	O15305;H3BV55;H3BPH4;O15305-2;H3BRM0;H3BNY9;H3BT06;H3BV34;H3BM92;H3BR08	O15305;H3BV55;H3BPH4;O15305-2;H3BRM0;H3BNY9;H3BT06;H3BV34;H3BM92;H3BR08	Phosphomannomutase 2	PMM2	10
1.208	1.1254	1.1829				1	5.8	20.776	8031100	5024400	3006700	10912000	4964500	5947500	3384100	1839800	1544300	NaN	O96000;O96000-2;H3BPJ9	O96000;O96000-2;H3BPJ9	NADH dehydrogenase [ubiquinone] 1 beta subcomplex subunit 10	NDUFB10	3
NaN	0.79359	NaN				1	4.9	33.805	0	0	0	10983000	6553900	4429100	0	0	0	NaN	Q16775;Q16775-2;H3BPQ4;H3BPK3;H3BQW8	Q16775;Q16775-2;H3BPQ4;H3BPK3;H3BQW8	Hydroxyacylglutathione hydrolase, mitochondrial	HAGH	5
NaN	NaN	0.59623				1	1.3	85.104	0	0	0	0	0	0	4792400	3478000	1314400	NaN	Q1KMD3;H3BQZ7	Q1KMD3;H3BQZ7	Heterogeneous nuclear ribonucleoprotein U-like protein 2	HNRNPUL2;hCG_2044799	2
NaN	NaN	NaN				1	7.2	19.608	0	0	0	0	0	0	0	0	0	NaN	P07741;H3BQZ9	P07741;H3BQZ9	Adenine phosphoribosyltransferase	APRT	2
NaN	NaN	NaN				1	34	17.793	0	0	0	0	0	0	0	0	0	NaN	H3BR04	H3BR04		ALDOA	1
0.91463	NaN	NaN				1	1.6	68.699	529760	285260	244500	0	0	0	0	0	0	NaN	P15170-3;P15170-2;Q8IYD1;P15170;H3BR35	P15170-3;P15170-2;Q8IYD1;P15170;H3BR35	Eukaryotic peptide chain release factor GTP-binding subunit ERF3B;Eukaryotic peptide chain release factor GTP-binding subunit ERF3A	GSPT2;GSPT1	5
NaN	1.0003	1.1131				1	1.8	99.554	0	0	0	2872000	1456700	1415300	3592400	1930900	1661600	NaN	H3BVG0;Q8N1F7;Q8N1F7-2;H3BRD9;H3BVE2	H3BVG0;Q8N1F7;Q8N1F7-2;H3BRD9;H3BVE2	Nuclear pore complex protein Nup93	NUP93	5
1.1342	1.1062	1.0177	+			1	3.6	33.382	123850	61841	62012	307610	136870	170740	160300	93663	66632	NaN	O14562;H3BRL3	O14562;H3BRL3	Ubiquitin domain-containing protein UBFD1	UBFD1	2
1.1494	1.2393	1.1907				2	9	33.582	1148700	529290	619440	6608600	2842600	3766000	2461800	1242100	1219700	NaN	Q6FI81;Q6FI81-3;H3BT65;H3BV90;H3BPG7;H3BUG4;H3BQ23	Q6FI81;Q6FI81-3;H3BT65;H3BV90;H3BPG7;H3BUG4;H3BQ23	Anamorsin	CIAPIN1	7
1.2905	0.6151	0.85331				3	2.2	115.58	553290	323140	230150	713100	454530	258570	18235000	11216000	7018700	NaN	Q8WWM7-3;Q8WWM7;H3BUF6;Q8WWM7-2;Q8WWM7-9;Q8WWM7-4;Q8WWM7-5;Q8WWM7-8;Q8WWM7-6;Q8WWM7-7;H3BSK9	Q8WWM7-3;Q8WWM7;H3BUF6;Q8WWM7-2;Q8WWM7-9;Q8WWM7-4;Q8WWM7-5;Q8WWM7-8;Q8WWM7-6	Ataxin-2-like protein	ATXN2L	11
NaN	NaN	0.64547				2	2	80.692	0	0	0	0	0	0	829190	584440	244760	NaN	P08047;P08047-3;H3BUU5	P08047;P08047-3;H3BUU5	Transcription factor Sp1	SP1	3
0.83412	NaN	NaN				1	1	136.11	2347900	1484000	863960	0	0	0	0	0	0	NaN	Q7L2E3-2;Q7L2E3;H7BXY3;Q7L2E3-3	Q7L2E3-2;Q7L2E3;H7BXY3;Q7L2E3-3	Putative ATP-dependent RNA helicase DHX30	DHX30	4
0.96081	1.0574	1.0152				1	3.7	29.096	2316200	1258600	1057500	4300100	2081100	2219000	2581400	1454000	1127400	NaN	Q00059;H7BYN3	Q00059;H7BYN3	Transcription factor A, mitochondrial	TFAM	2
0.94625	0.96853	0.89758				12	24.2	57.116	993820000	575010000	418810000	1064600000	563780000	500800000	1357800000	801830000	555970000	NaN	P07237;H7BZ94;I3L312;H0Y3Z3;I3L398;I3NI03;I3L4M2;I3L3U6;I3L0S0;I3L3P5;I3L514;I3L1Y5	P07237;H7BZ94;I3L312;H0Y3Z3;I3L398	Protein disulfide-isomerase	P4HB	12
NaN	NaN	1.4421				1	1	116.04	0	0	0	0	0	0	3599800	2375400	1224400	NaN	P06756;P06756-2;P06756-3;H7BZG1	P06756;P06756-2;P06756-3;H7BZG1	Integrin alpha-V;Integrin alpha-V heavy chain;Integrin alpha-V light chain	ITGAV	4
NaN	NaN	2.5811				1	2.3	65.948	0	0	0	0	0	0	1201800	328360	873460	NaN	Q9BV36;Q9BV36-2;Q9BV36-3;Q9BV36-5;H7C3K9;H7C371;H7C052;H7C190	Q9BV36;Q9BV36-2;Q9BV36-3;Q9BV36-5;H7C3K9;H7C371;H7C052;H7C190	Melanophilin	MLPH	8
1.0956	1.0877	1.2615				1	2.2	57.46	658330000	351750000	306580000	262330000	125560000	136780000	187980000	98754000	89222000	NaN	Q9C037;Q9C037-2;Q9C037-3;H7C0Q6	Q9C037;Q9C037-2;Q9C037-3;H7C0Q6	Tripartite motif-containing protein 4	TRIM4	4
NaN	NaN	NaN				1	8.4	22.065	0	0	0	0	0	0	0	0	0	NaN	H7C1E4	H7C1E4		AP1S1	1
NaN	NaN	NaN				1	1	210.77	0	0	0	0	0	0	0	0	0	NaN	Q2PPJ7;Q2PPJ7-2;Q2PPJ7-3;H7C1F9	Q2PPJ7;Q2PPJ7-2;Q2PPJ7-3;H7C1F9	Ral GTPase-activating protein subunit alpha-2	RALGAPA2	4
0.96708	1.0737	1.7406				1	13.8	11.755	156000	82742	73259	215640	102980	112660	164140	72292	91851	NaN	H7C2M1	H7C2M1		SCLY	1
NaN	NaN	NaN				1	3.9	40.684	0	0	0	4154200	4154200	0	0	0	0	NaN	H7C2Q8;Q99848	H7C2Q8;Q99848	Probable rRNA-processing protein EBP2	EBNA1BP2	2
NaN	NaN	0.93587				1	1.3	100.67	0	0	0	0	0	0	18701000	11092000	7608600	NaN	Q9BXP5;Q9BXP5-3;Q9BXP5-2;Q9BXP5-4;Q9BXP5-5;H7C3A1	Q9BXP5;Q9BXP5-3;Q9BXP5-2;Q9BXP5-4;Q9BXP5-5;H7C3A1	Serrate RNA effector molecule homolog	SRRT	6
1.7259	1.2428	1.2626				3	9.8	41.331	30205000	15212000	14992000	28857000	12340000	16517000	26936000	14412000	12524000	NaN	P50502;H7C3I1;Q8NFI4;Q8IZP2;Q3KNR6;F6VDH7	P50502;H7C3I1;Q8NFI4;Q8IZP2;Q3KNR6;F6VDH7	Hsc70-interacting protein;Putative protein FAM10A5;Putative protein FAM10A4	ST13;ST13P5;ST13P4	6
0.98639	1.0359	1.1426				1	4	47.873	2431400	1348200	1083200	2274200	1135500	1138700	1188300	719920	468340	NaN	Q9UNS2;Q9UNS2-2;H7C3P9	Q9UNS2;Q9UNS2-2;H7C3P9	COP9 signalosome complex subunit 3	COPS3	3
NaN	NaN	NaN				1	3.7	29.702	0	0	0	0	0	0	0	0	0	NaN	Q9Y5M8;H7C4H2	Q9Y5M8;H7C4H2	Signal recognition particle receptor subunit beta	SRPRB	2
1.1317	0.99966	1.0554				1	1.9	71.751	12798000	6981000	5817100	15297000	7227500	8069400	20786000	11670000	9116300	NaN	Q15637-5;Q15637;Q15637-2;Q15637-3;Q15637-7;Q15637-6;Q15637-4;H7C561	Q15637-5;Q15637;Q15637-2;Q15637-3;Q15637-7;Q15637-6;Q15637-4;H7C561	Splicing factor 1	SF1	8
NaN	0.82456	0.8867				4	5.5	114.76	0	0	0	23913000	14204000	9709800	6960300	4254200	2706100	NaN	P16615;P16615-4;P16615-3;P16615-2;P16615-5;H7C5W9;Q93084-5;Q93084-6;Q93084;Q93084-7;Q93084-3;O14983;Q93084-2;Q93084-4;O14983-2;O14983-3;A0A0C4DH86	P16615;P16615-4;P16615-3;P16615-2;P16615-5;H7C5W9;Q93084-5;Q93084-6;Q93084;Q93084-7;Q93084-3;O14983;Q93084-2;Q93084-4;O14983-2;O14983-3	Sarcoplasmic/endoplasmic reticulum calcium ATPase 2;Sarcoplasmic/endoplasmic reticulum calcium ATPase 3;Sarcoplasmic/endoplasmic reticulum calcium ATPase 1	ATP2A2;ATP2A3;ATP2A1	17
0.74828	0.70366	0.81684				5	13.8	107.14	113980000	71363000	42614000	138980000	72716000	66262000	140680000	103740000	36944000	NaN	P12814-4;P12814-3;P12814;P12814-2;H9KV75;G3V2N5;G3V2W4;H7C5W8;H0YJW3;H0YJ11	P12814-4;P12814-3;P12814;P12814-2;H9KV75;G3V2N5;G3V2W4	Alpha-actinin-1	ACTN1	10
1.093	1.2134	1.0515				1	0.9	82.593	7953300	4618300	3335000	7347800	3248500	4099300	24038000	13643000	10395000	NaN	P46459;I3L0N3;P46459-2;I3L0L3	P46459;I3L0N3;P46459-2;I3L0L3	Vesicle-fusing ATPase	NSF	4
NaN	NaN	NaN				2	3	86.191	0	0	0	0	0	0	0	0	0	NaN	O14964;O14964-2;I3L1P5;I3L165;I3L2H4	O14964;O14964-2;I3L1P5;I3L165;I3L2H4	Hepatocyte growth factor-regulated tyrosine kinase substrate	HGS	5
0.84897	0.9524	0.90426				2	1.8	149.37	16909000	10548000	6361800	19136000	10110000	9026500	17733000	9878200	7854600	NaN	Q9BQG0-2;Q9BQG0;I3L1L3	Q9BQG0-2;Q9BQG0;I3L1L3	Myb-binding protein 1A	MYBBP1A	3
1.0111	0.83038	1.0027				4	33.9	20.503	52834000	30266000	22568000	84863000	42458000	42405000	65928000	37018000	28911000	NaN	I3L504;P63241-2;P63241;Q6IS14;I3L397;Q9GZV4;C9J4W5;C9J7B5;F8WCJ1	I3L504;P63241-2;P63241;Q6IS14;I3L397;Q9GZV4;C9J4W5;C9J7B5;F8WCJ1	Eukaryotic translation initiation factor 5A-1;Eukaryotic translation initiation factor 5A-1-like;Eukaryotic translation initiation factor 5A-2	EIF5A;EIF5AL1;EIF5A2	9
0.82046	0.99423	0.88236				2	12.4	31.362	12129000	7608600	4520700	11981000	6541900	5439100	17339000	12341000	4998300	NaN	Q07021;I3L3B0;I3L3Q7	Q07021;I3L3B0;I3L3Q7	Complement component 1 Q subcomponent-binding protein, mitochondrial	C1QBP	3
NaN	1.5108	NaN				1	0.8	172.64	0	0	0	7573400	3391200	4182200	0	0	0	NaN	P33527-9;P33527;P33527-3;P33527-2;P33527-4;I3L4X2;P33527-5;P33527-7;P33527-6;P33527-8	P33527-9;P33527;P33527-3;P33527-2;P33527-4;I3L4X2;P33527-5;P33527-7;P33527-6;P33527-8	Multidrug resistance-associated protein 1	ABCC1	10
1.1494	0.89243	0.8905				2	22.7	16.694	5861800	3475700	2386100	7451400	3684700	3766700	2365800	1357800	1008000	NaN	J3KNF8;O43169;H3BUX2	J3KNF8;O43169;H3BUX2	Cytochrome b5 type B	CYB5B	3
1.074	1.0723	1.1341				1	7.2	25.476	26751000	14977000	11774000	69762000	35716000	34046000	40592000	21115000	19476000	NaN	Q01130;Q01130-2;J3KP15;J3QL05	Q01130;Q01130-2;J3KP15;J3QL05	Serine/arginine-rich splicing factor 2	SRSF2	4
0.81648	0.77544	0.79193				5	28.2	45.26	745340000	456460000	288880000	2220700000	1214700000	1006000000	1544000000	954240000	589790000	NaN	P04075-2;J3KPS3;P04075;H3BQN4;H3BPS8;H3BUH7;H3BU78;H3BMQ8;H3BR68;P05062;P09972;A0A087WXX2	P04075-2;J3KPS3;P04075;H3BQN4;H3BPS8;H3BUH7	Fructose-bisphosphate aldolase A;Fructose-bisphosphate aldolase	ALDOA	12
1.1602	1	1.0798				4	12.7	46.937	57035000	32357000	24678000	40038000	20348000	19690000	41457000	23051000	18406000	NaN	J3KQ32;Q9NTK5;Q9NTK5-3;Q9NTK5-2;C9JTK6	J3KQ32;Q9NTK5;Q9NTK5-3;Q9NTK5-2;C9JTK6	Obg-like ATPase 1	OLA1	5
NaN	NaN	NaN				2	18.3	19.325	0	0	0	0	0	0	0	0	0	NaN	J3KQ48;Q9Y3E5	J3KQ48;Q9Y3E5	Peptidyl-tRNA hydrolase 2, mitochondrial	PTRH2	2
0.87404	0.73858	0.74882				1	1.9	47.573	79369000	51206000	28163000	75078000	43203000	31876000	76171000	49699000	26472000	NaN	P21579;J3KQA0;Q8N9I0	P21579;J3KQA0;Q8N9I0	Synaptotagmin-1;Synaptotagmin-2	SYT1;SYT2	3
1.0861	1.0459	1.2201				3	3.5	144.5	56673000	32112000	24560000	53587000	27159000	26428000	82260000	45319000	36941000	NaN	P41252;J3KR24;A0A0A0MSX9;Q5TCC6	P41252;J3KR24;A0A0A0MSX9	Isoleucine--tRNA ligase, cytoplasmic	IARS	4
0.75249	1.1291	1.212				2	19.7	27.139	14003000	7913000	6090400	11047000	6005200	5041400	98625000	49136000	49489000	NaN	J3KRY1;J3QQX2;P52565;J3KTF8;P52565-2;J3KRE2;J3KS60	J3KRY1;J3QQX2;P52565;J3KTF8;P52565-2;J3KRE2;J3KS60	Rho GDP-dissociation inhibitor 1	ARHGDIA	7
0.80218	0.82241	0.83018				1	3.7	54.099	800740	508420	292320	1568700	844630	724040	1861900	1168500	693330	NaN	O43237;O43237-2;J3KRI4;J3KRZ2	O43237;O43237-2;J3KRI4;J3KRZ2	Cytoplasmic dynein 1 light intermediate chain 2	DYNC1LI2	4
NaN	NaN	0.92322				1	2.2	87.66	0	0	0	0	0	0	190990	103720	87267	NaN	Q86UE8;Q86UE8-2;Q86UE8-3;J3QLK5;J3KRK0;J3KT82	Q86UE8;Q86UE8-2;Q86UE8-3;J3QLK5;J3KRK0;J3KT82	Serine/threonine-protein kinase tousled-like 2	TLK2	6
1.7211	0.96029	NaN				1	6.3	23.63	2279400	1204000	1075400	2539500	1229100	1310400	0	0	0	NaN	Q14197;J3KS15	Q14197;J3KS15	Peptidyl-tRNA hydrolase ICT1, mitochondrial	ICT1	2
NaN	1.64	1.4503				1	4.3	24.261	0	0	0	117150	45748	71400	89825	45381	44444	NaN	P26373;P26373-2;J3KS98	P26373;P26373-2;J3KS98	60S ribosomal protein L13	RPL13	3
0.89592	1.1613	1.0819				1	9.9	19.916	1766200	1105100	661100	1434500	786150	648340	716020	380290	335720	NaN	Q9UK76-2;Q9UK76;Q9UK76-3;J3KT51;J3KSH8	Q9UK76-2;Q9UK76;Q9UK76-3;J3KT51;J3KSH8	Hematological and neurological expressed 1 protein	HN1	5
NaN	1.146	NaN				1	4.1	31.704	0	0	0	626390	277360	349030	0	0	0	NaN	J3QLS3;Q9Y2R9;J3QKW2;J3QQS1;J3KSI8	J3QLS3;Q9Y2R9;J3QKW2;J3QQS1;J3KSI8	28S ribosomal protein S7, mitochondrial	MRPS7	5
2.3785	NaN	NaN	+			1	2.3	52.761	10992000	4642600	6349000	0	0	0	0	0	0	NaN	Q6QEF8;Q6QEF8-5;J3KSS5;J3QLV6;Q6QEF8-2;Q6QEF8-3;Q6QEF8-4	Q6QEF8;Q6QEF8-5;J3KSS5;J3QLV6;Q6QEF8-2;Q6QEF8-3;Q6QEF8-4	Coronin-6	CORO6	7
2.4	NaN	NaN				1	2.7	31.999	9884500	3241500	6643000	0	0	0	0	0	0	NaN	Q07955-2;J3KTL2;Q07955;Q07955-3;J3KSW7;J3QQV5	Q07955-2;J3KTL2;Q07955;Q07955-3;J3KSW7;J3QQV5	Serine/arginine-rich splicing factor 1	SRSF1	6
1.5851	1.7136	1.7023				2	9.1	46.153	52199000	24198000	28001000	36398000	14176000	22221000	35785000	15708000	20076000	NaN	P60842;P60842-2;J3KT12;J3QS69;J3KTB5;Q14240-2;Q14240;E7EQG2;J3QL43;J3KSZ0;J3QR64;J3KS25;J3QLN6;J3QKZ9;J3KTN0;J3KSN7;E7EMV8;J3KS93;J3KT04	P60842;P60842-2;J3KT12;J3QS69;J3KTB5;Q14240-2;Q14240;E7EQG2;J3QL43;J3KSZ0;J3QR64;J3KS25;J3QLN6;J3QKZ9;J3KTN0;J3KSN7;E7EMV8;J3KS93;J3KT04	Eukaryotic initiation factor 4A-I;Eukaryotic initiation factor 4A-II	EIF4A1;EIF4A2	19
1.0299	0.87349	0.72069				1	1.7	92.596	3463900	2067800	1396100	4526300	2427700	2098600	5169000	3051400	2117600	NaN	Q14694-2;Q14694-3;Q14694;J3KT19	Q14694-2;Q14694-3;Q14694;J3KT19	Ubiquitin carboxyl-terminal hydrolase 10	USP10	4
1.0117	1.0854	0.99988				1	3.9	69.086	8565400	4662200	3903200	5717600	2577100	3140400	14521000	8412700	6108600	NaN	J3KTA4;P17844;P17844-2	J3KTA4;P17844;P17844-2	Probable ATP-dependent RNA helicase DDX5	DDX5	3
NaN	NaN	NaN				1	2.1	102.97	0	0	0	0	0	0	0	0	0	NaN	Q86XP3;J3KTK9;J3QRI2	Q86XP3;J3KTK9;J3QRI2	ATP-dependent RNA helicase DDX42	DDX42	3
NaN	NaN	NaN				1	3.6	46.288	0	0	0	0	0	0	0	0	0	NaN	Q8TF74;J3QKM5	Q8TF74;J3QKM5	WAS/WASL-interacting protein family member 2	WIPF2	2
0.95396	0.97354	1.4526				4	12.8	45.626	8270400	4658600	3611800	26466000	12991000	13475000	19743000	10791000	8952000	NaN	P62195;J3QQM1;P62195-2;J3QSA9;J3KRP2;J3QLH6;J3QSE0;J3QRW1;J3QRR3;J3KTQ9	P62195;J3QQM1;P62195-2;J3QSA9;J3KRP2;J3QLH6;J3QSE0;J3QRW1	26S protease regulatory subunit 8	PSMC5	10
NaN	NaN	1.1166				2	5.8	39.318	0	0	0	0	0	0	3201300	2063400	1137900	NaN	P46734;J3QR49;E9PMA8;J3QL77;X6RB39	P46734;J3QR49;E9PMA8;J3QL77;X6RB39	Dual specificity mitogen-activated protein kinase kinase 3	MAP2K3	5
NaN	1.0675	NaN				2	6.1	57.669	0	0	0	5179300	1914100	3265200	0	0	0	NaN	P51648-2;P51648;J3QRD1	P51648-2;P51648;J3QRD1	Fatty aldehyde dehydrogenase	ALDH3A2	3
0.83219	1.2625	1.8867				1	4	37.154	6360400	3672700	2687700	11688000	4464700	7223500	8270100	3420500	4849700	NaN	O43684;O43684-2;J3QT28;J3QSX4	O43684;O43684-2;J3QT28;J3QSX4	Mitotic checkpoint protein BUB3	BUB3	4
0.7717	NaN	NaN				2	3.2	103.98	5981300	3971000	2010300	0	0	0	0	0	0	NaN	Q13620;K4DI93;Q13620-1;Q13620-3;A6NE76	Q13620;K4DI93;Q13620-1;Q13620-3;A6NE76	Cullin-4B	CUL4B	5
0.967	1.0012	0.95005				1	2.2	61.252	121290000	70694000	50597000	212780000	106310000	106470000	189830000	107780000	82047000	NaN	Q8IYT4;Q8IYT4-2;K7EIJ8;K7EM02	Q8IYT4;Q8IYT4-2;K7EIJ8;K7EM02	Katanin p60 ATPase-containing subunit A-like 2	KATNAL2	4
0.4582	NaN	1.0941				1	1.3	106.49	2815600	1989800	825810	0	0	0	4153900	1998100	2155800	NaN	P36776;P36776-2;K7EKE6;K7EJE8;P36776-3;K7ER27;K7ER56	P36776;P36776-2;K7EKE6;K7EJE8;P36776-3;K7ER27;K7ER56	Lon protease homolog, mitochondrial	LONP1	7
1.2361	1.0747	1.3394				1	8.6	14.787	9593000	4241400	5351600	20908000	9309500	11599000	14385000	7527900	6856600	NaN	P35268;K7ERI7;K7EMH1;K7ELC4;K7EKS7;K7EP65;K7EJT5	P35268;K7ERI7;K7EMH1;K7ELC4;K7EKS7;K7EP65;K7EJT5	60S ribosomal protein L22	RPL22	7
1.5603	1.238	1.2073				4	17.2	35.611	7754300	3878600	3875600	5816200	2975200	2841000	13374000	6334700	7038800	NaN	O75821;K7EL20;K7ER90;K7ENA8;K7EP16;K7EL60	O75821;K7EL20;K7ER90;K7ENA8;K7EP16	Eukaryotic translation initiation factor 3 subunit G	EIF3G	6
NaN	NaN	NaN				1	9.7	16.359	0	0	0	0	0	0	0	0	0	NaN	K7ELC7;P61353;K7EQQ9	K7ELC7;P61353;K7EQQ9	60S ribosomal protein L27	RPL27	3
0.7782	0.84409	0.7785				1	3.6	30.375	6030300	3995700	2034600	7783900	4355100	3428700	3640100	2396900	1243100	NaN	O43760-2;O43760;K7ENG9;K7ELD9	O43760-2;O43760;K7ENG9;K7ELD9	Synaptogyrin-2	SYNGR2	4
0.98962	1.1009	0.9344				2	3.2	60.192	82037000	45973000	36063000	24380000	12303000	12077000	26527000	15521000	11005000	NaN	K7ELL7;P14314;P14314-2;K7EPW7	K7ELL7;P14314;P14314-2;K7EPW7	Glucosidase 2 subunit beta	PRKCSH	4
0.7113	0.95139	0.90251				1	2.8	39.609	457220	303180	154040	323970	199820	124140	850240	466430	383800	NaN	P54725;P54725-3;P54725-2;K7ELW1;K7ENJ0	P54725;P54725-3;P54725-2;K7ELW1;K7ENJ0	UV excision repair protein RAD23 homolog A	RAD23A	5
0.59853	0.53136	0.55212				1	26.7	4.8036	36884000	25728000	11156000	22168000	14809000	7359400	60048000	39070000	20978000	NaN	K7EMF8	K7EMF8			1
NaN	1.2773	1.2029				1	7.4	18.243	0	0	0	2768300	1059000	1709300	1459400	723080	736350	NaN	Q13526;K7EMU7;O15428	Q13526;K7EMU7;O15428	Peptidyl-prolyl cis-trans isomerase NIMA-interacting 1;Putative PIN1-like protein	PIN1;PIN1P1	3
NaN	NaN	NaN				1	13.8	19.891	0	0	0	0	0	0	0	0	0	NaN	Q99497;K7EN27	Q99497;K7EN27	Protein DJ-1	PARK7	2
NaN	NaN	NaN				1	2.2	78.839	0	0	0	0	0	0	0	0	0	NaN	P52888;K7EP46	P52888;K7EP46	Thimet oligopeptidase	THOP1	2
2.5075	NaN	0.70946				2	7.4	32.722	42853000	21304000	21549000	0	0	0	15673000	10575000	5098100	NaN	P67936-2;P67936;K7EPB9;K7EMU5	P67936-2;P67936;K7EPB9;K7EMU5	Tropomyosin alpha-4 chain	TPM4	4
NaN	NaN	NaN				1	5.2	23.412	0	0	0	0	0	0	0	0	0	NaN	Q6ZR64;P84157-2;K7EQX8	Q6ZR64;P84157-2;K7EQX8			3
0.90976	0.80685	0.6895				2	5.3	47.074	27303000	16194000	11109000	1009500	586200	423290	1077400	714660	362740	NaN	O60664;O60664-3;O60664-4;K7ERZ3;O60664-2;K7EL96;K7ER39	O60664;O60664-3;O60664-4;K7ERZ3;O60664-2;K7EL96;K7ER39	Perilipin-3	PLIN3	7
1.0694	1.031	0.91088				1	5.4	20.478	4240200	2379400	1860800	3752400	1925400	1827000	2982300	1683900	1298400	NaN	P51452;P51452-2;K7ES89	P51452;P51452-2;K7ES89	Dual specificity protein phosphatase 3	DUSP3	3
NaN	NaN	1.2433				1	10.5	16.142	0	0	0	0	0	0	1337500	784350	553190	NaN	K7ESN4	K7ESN4			1
0.97756	0.91126	1.0302				1	3.7	50.464	3025700	1775400	1250300	19375000	10210000	9164500	10946000	5894400	5051900	NaN	Q3ZCQ8-2;Q3ZCQ8;M0R003;M0R1Y4;M0R047;M0R2D2;M0R303;M0R2Z3;M0QXC3	Q3ZCQ8-2;Q3ZCQ8;M0R003;M0R1Y4;M0R047;M0R2D2;M0R303;M0R2Z3;M0QXC3	Mitochondrial import inner membrane translocase subunit TIM50	TIMM50	9
NaN	1.1567	1.0189				1	6.7	31.279	0	0	0	25324000	10309000	15015000	46652000	28997000	17655000	NaN	P09012;M0R268;M0R2B8;M0R221;M0QXK2;M0R0G9	P09012;M0R268;M0R2B8;M0R221;M0QXK2;M0R0G9	U1 small nuclear ribonucleoprotein A	SNRPA	6
0.90429	NaN	2.819				2	5.1	51.355	8524100	5142100	3382000	0	0	0	2587500	1417100	1170400	NaN	O43615;M0QXU7	O43615;M0QXU7	Mitochondrial import inner membrane translocase subunit TIM44	TIMM44	2
0.256	NaN	NaN				1	1	140.26	553370	453620	99748	0	0	0	0	0	0	NaN	Q9UPT8;M0QY97	Q9UPT8;M0QY97	Zinc finger CCCH domain-containing protein 4	ZC3H4	2
1.3463	1.2923	1.2816				5	15.7	24.104	211960000	119080000	92878000	117240000	53339000	63904000	139400000	74337000	65068000	NaN	M0QYS1;P40429;Q8J015;Q6NVV1	M0QYS1;P40429;Q8J015;Q6NVV1	60S ribosomal protein L13a;Putative 60S ribosomal protein L13a-like MGC87657	RPL13A;RPL13a	4
NaN	0.79635	0.55643				0	8.7	35.904	0	0	0	9825200	5043000	4782200	12508000	7299300	5208400	NaN	M0QYT0	M0QYT0			1
NaN	NaN	NaN				1	1.5	126.39	0	0	0	0	0	0	0	0	0	NaN	M0R2B7;P28340;M0QZR8;M0QZB4	M0R2B7;P28340;M0QZR8;M0QZB4	DNA polymerase delta catalytic subunit	POLD1	4
1.3765	1.3923	1.382				3	16.5	18.431	100920000	44653000	56271000	103090000	39089000	64001000	56118000	25166000	30952000	NaN	P62280;M0QZC5;M0R1H6	P62280;M0QZC5	40S ribosomal protein S11	RPS11	3
NaN	NaN	NaN				1	1	152.22	0	0	0	0	0	0	0	0	0	NaN	O60885;O60885-3;O60885-2;M0QZD9	O60885;O60885-3;O60885-2;M0QZD9	Bromodomain-containing protein 4	BRD4	4
NaN	1.371	1.3516				2	8	25.333	0	0	0	5943900	2636400	3307400	1641800	792540	849250	NaN	M0R0R2;P46782;M0R0F0;M0QZN2	M0R0R2;P46782;M0R0F0;M0QZN2	40S ribosomal protein S5;40S ribosomal protein S5, N-terminally processed	RPS5	4
NaN	NaN	NaN				1	3.4	33.232	0	0	0	0	0	0	0	0	0	NaN	P54920;M0R0Y2;M0R213	P54920;M0R0Y2;M0R213	Alpha-soluble NSF attachment protein	NAPA	3
1.4677	NaN	NaN				1	2.4	51.156	12661000	5298700	7362200	0	0	0	0	0	0	NaN	Q9Y230;Q9Y230-2;M0R0Y3	Q9Y230;Q9Y230-2;M0R0Y3	RuvB-like 2	RUVBL2	3
1.0711	NaN	NaN				1	1	88.549	7087500	3752300	3335200	0	0	0	0	0	0	NaN	Q13263;Q13263-2;M0R3C0	Q13263;Q13263-2;M0R3C0	Transcription intermediary factor 1-beta	TRIM28	3
NaN	NaN	NaN				1	2.5	67.764	0	0	0	0	0	0	0	0	0	NaN	O00186	O00186	Syntaxin-binding protein 3	STXBP3	1
NaN	1.0703	1.1066				2	2	121.32	0	0	0	1038200	464700	573450	5959500	3245100	2714400	NaN	O00203;O00203-3	O00203;O00203-3	AP-3 complex subunit beta-1	AP3B1	2
0.89324	0.9291	0.91451				3	7.8	47.534	1848300000	1100600000	747700000	2606800000	1379000000	1227800000	1591100000	944830000	646320000	NaN	O00231-2;O00231;J3QRY4;J3QS13	O00231-2;O00231;J3QRY4	26S proteasome non-ATPase regulatory subunit 11	PSMD11	4
1.0542	0.88864	0.80886				4	8.6	52.904	14219000	7986700	6232700	32150000	15719000	16432000	30702000	18329000	12373000	NaN	O00232;O00232-2	O00232;O00232-2	26S proteasome non-ATPase regulatory subunit 12	PSMD12	2
0.88	0.89881	1.7882				3	17.4	26.922	34344000	20794000	13550000	67156000	36725000	30431000	75685000	44762000	30924000	NaN	O00299	O00299	Chloride intracellular channel protein 1	CLIC1	1
1.0341	NaN	NaN	+			1	1.6	86.307	4725400	3144200	1581100	0	0	0	0	0	0	NaN	O00308-2	O00308-2			1
0.90759	NaN	1.0129				4	5.1	125.54	38521000	22551000	15970000	0	0	0	41672000	24382000	17290000	NaN	O00410-3;O00410;H0Y8C6;O00410-2;E7ETV3;E7EV12;E7ETV8;E7EQT5;E7EX05;E7EWK4;E7ESZ1;E7ESA1;C9JQT6;C9J875;C9JZD8;C9JXE0	O00410-3;O00410;H0Y8C6;O00410-2	Importin-5	IPO5	16
0.75753	0.91402	1.2895				2	4.4	83.398	1549800	948440	601380	4733500	2443900	2289600	7866000	4136000	3730000	NaN	O00429-6;O00429-8;O00429;O00429-2;O00429-7;G8JLD5;O00429-3;O00429-5;O00429-4	O00429-6;O00429-8;O00429;O00429-2;O00429-7;G8JLD5;O00429-3;O00429-5;O00429-4	Dynamin-1-like protein	DNM1L	9
1.031	1.0567	1.0032				1	0.7	190.68	6800800	3966800	2833900	8230800	4350800	3879900	10232000	6127200	4104300	NaN	O00443	O00443	Phosphatidylinositol 4-phosphate 3-kinase C2 domain-containing subunit alpha	PIK3C2A	1
NaN	NaN	NaN				1	5.2	34.577	0	0	0	0	0	0	0	0	0	NaN	O00487	O00487	26S proteasome non-ATPase regulatory subunit 14	PSMD14	1
1.0414	1.6023	1.076				1	3.4	32.113	3592700	2132800	1459900	5381200	2888300	2492900	10452000	5916900	4535300	NaN	O00625	O00625	Pirin	PIR	1
NaN	NaN	0.7787				1	0.9	123.9	0	0	0	0	0	0	1729800	1124300	605510	NaN	O14776;O14776-2	O14776;O14776-2	Transcription elongation regulator 1	TCERG1	2
0.97642	0.94454	1.0999				2	10.5	27.887	28491000	16993000	11498000	91619000	45781000	45839000	46920000	25498000	21422000	NaN	O14818;O14818-2;Q8TAA3;Q8TAA3-5;A0A087WYS6;Q8TAA3-2;H0Y586	O14818;O14818-2;Q8TAA3;Q8TAA3-5;A0A087WYS6;Q8TAA3-2;H0Y586	Proteasome subunit alpha type-7;Proteasome subunit alpha type-7-like	PSMA7;PSMA8	7
NaN	NaN	0.91319				2	3	115.28	0	0	0	0	0	0	1652400	862400	790040	NaN	O14974;O14974-3;O14974-4;O14974-5;O14974-2;F8VZN8;H0YIS3;H0YIM2;A0A0U1RQZ1	O14974;O14974-3;O14974-4;O14974-5;O14974-2;F8VZN8;H0YIS3;H0YIM2;A0A0U1RQZ1	Protein phosphatase 1 regulatory subunit 12A	PPP1R12A	9
1.5648	1.0243	0.99323				2	2.2	123.38	6541100	3374700	3166400	26729000	13125000	13604000	18080000	10422000	7657500	NaN	O14980;C9JKM9;C9J673;C9JV99;C9JQ02;C9IZS4;H7BZC5	O14980;C9JKM9;C9J673;C9JV99;C9JQ02;C9IZS4;H7BZC5	Exportin-1	XPO1	7
1.1557	NaN	NaN				1	1.2	118.29	3301700	1851200	1450400	0	0	0	0	0	0	NaN	O15042;O15042-2;O15042-3	O15042;O15042-2;O15042-3	U2 snRNP-associated SURP motif-containing protein	U2SURP	3
1.5412	1.1624	1.1786				1	0.8	144.73	5842200	2922100	2920100	9419800	4434500	4985300	7624800	3747700	3877100	NaN	O15067	O15067	Phosphoribosylformylglycinamidine synthase	PFAS	1
NaN	NaN	NaN				1	3.7	34.333	0	0	0	0	0	0	0	0	0	NaN	O15144	O15144	Actin-related protein 2/3 complex subunit 2	ARPC2	1
0.96894	0.84557	0.78069				3	20.8	20.546	4160900	2294100	1866800	18588000	9489300	9099100	2692700	1952600	740160	NaN	O15145;C9JZD1;F8VR50	O15145;C9JZD1	Actin-related protein 2/3 complex subunit 3	ARPC3	3
NaN	NaN	NaN				1	3.3	59.271	0	0	0	0	0	0	0	0	0	NaN	O15355	O15355	Protein phosphatase 1G	PPM1G	1
1.055	1.0489	0.65885				3	7.7	56.65	48637000	27566000	21071000	71108000	34391000	36717000	59160000	33071000	26090000	NaN	O43175;Q5SZU1	O43175;Q5SZU1	D-3-phosphoglycerate dehydrogenase	PHGDH	2
1.0793	1.0258	1.0266				1	2.1	60.977	12542000	7309200	5232800	10604000	4566900	6036800	24992000	12942000	12050000	NaN	O43242;O43242-2	O43242;O43242-2	26S proteasome non-ATPase regulatory subunit 3	PSMD3	2
1.8186	1.4647	1.6235				5	17.7	39.562	894530	303680	590850	9364800	3356600	6008200	1922900	585040	1337900	NaN	O43493-4;O43493;F8W8W7;J3KQ45;O43493-3;O43493-5;O43493-2;O43493-6	O43493-4;O43493;F8W8W7;J3KQ45;O43493-3;O43493-5;O43493-2;O43493-6	Trans-Golgi network integral membrane protein 2	TGOLN2	8
1.2812	1.5203	1.2195				1	4	39.45	11899000	6314700	5583800	7842600	2668900	5173700	11374000	6003700	5370800	NaN	O43570;O43570-2	O43570;O43570-2	Carbonic anhydrase 12	CA12	2
0.58097	0.56645	0.5833				12	22.5	104.85	1081600000	702690000	378910000	1544300000	969510000	574840000	1615400000	1170700000	444670000	NaN	O43707;O43707-2;F5GXS2;O43707-3;K7EJH8;H7C144;A0A087WSZ2;Q08043;P35609;P35609-2;F6THM6;K7EP19	O43707;O43707-2	Alpha-actinin-4	ACTN4	12
0.70386	NaN	0.85845				3	13.9	38.05	56621000	32952000	23669000	0	0	0	28412000	17108000	11304000	NaN	O43852-3;O43852-4;O43852;O43852-2;O43852-6;O43852-10;O43852-8;O43852-5;O43852-11;O43852-7;O43852-9;O43852-14;O43852-13;O43852-12;O43852-15	O43852-3;O43852-4;O43852;O43852-2;O43852-6;O43852-10;O43852-8;O43852-5;O43852-11;O43852-7;O43852-9;O43852-14;O43852-13;O43852-12	Calumenin	CALU	15
1.2504	1.3308	1.234				12	43.7	36.019	4663900000	2314100000	2349700000	6773700000	2902800000	3870900000	7492600000	3843900000	3648600000	NaN	O60218;C9JRZ8;C9JRZ8-2	O60218	Aldo-keto reductase family 1 member B10	AKR1B10	3
1.0879	1.0662	1.1761				1	4.3	18.762	14339000	7989700	6349700	11108000	5302100	5806000	19986000	10498000	9488200	NaN	O60493;O60493-3	O60493;O60493-3	Sorting nexin-3	SNX3	2
1.0873	1.1136	1.0544				7	14.8	55.023	600050000	335720000	264330000	738780000	368120000	370670000	901780000	519030000	382750000	NaN	O60701;O60701-2;O60701-3	O60701;O60701-2;O60701-3	UDP-glucose 6-dehydrogenase	UGDH	3
NaN	NaN	0.97782				2	2.8	109.19	0	0	0	0	0	0	15066000	9029900	6036300	NaN	O60763-2;O60763	O60763-2;O60763	General vesicular transport factor p115	USO1	2
NaN	NaN	NaN				1	6.8	23.823	0	0	0	0	0	0	0	0	0	NaN	O60830-2;V9GYS0;O60830	O60830-2;V9GYS0;O60830	Mitochondrial import inner membrane translocase subunit Tim17-B	TIMM17B	3
0.97152	1.1406	NaN				2	7.5	45.745	16979000	10359000	6620300	15006000	6811600	8194700	0	0	0	NaN	O60884;A0A087WT48;I3L320	O60884;A0A087WT48;I3L320	DnaJ homolog subfamily A member 2	DNAJA2	3
NaN	1.3056	NaN				3	1.5	254.41	0	0	0	4412800	2546800	1866000	0	0	0	NaN	O75165	O75165	DnaJ homolog subfamily C member 13	DNAJC13	1
1.0841	1.352	NaN				1	4.5	52.545	1944300	1023100	921280	2313800	1025400	1288500	0	0	0	NaN	O75306;O75306-2	O75306;O75306-2	NADH dehydrogenase [ubiquinone] iron-sulfur protein 2, mitochondrial	NDUFS2	2
0.70703	0.68888	0.67584				23	12	281.63	228830000	151360000	77470000	633070000	394040000	239030000	641440000	439750000	201680000	NaN	O75369-8;O75369;O75369-9;O75369-2;O75369-3;O75369-6;O75369-7;E7EN95;O75369-4;O75369-5;Q14315;Q14315-2;H7C5L4;A0A0A0MT44	O75369-8;O75369;O75369-9;O75369-2;O75369-3;O75369-6;O75369-7;E7EN95;O75369-4;O75369-5	Filamin-B	FLNB	14
0.86576	NaN	NaN				1	4	38.925	1698100	1025000	673060	0	0	0	0	0	0	NaN	O75477	O75477	Erlin-1	ERLIN1	1
0.75906	0.82075	1.0611				2	1.5	145.83	8068500	5017700	3050800	619450	339940	279500	34999000	20750000	14249000	NaN	O75533	O75533	Splicing factor 3B subunit 1	SF3B1	1
1.3206	1.2305	1.3447				5	16.9	46.659	65751000	34313000	31438000	43584000	18807000	24778000	32153000	16801000	15353000	NaN	O75874	O75874	Isocitrate dehydrogenase [NADP] cytoplasmic	IDH1	1
0.93009	0.95682	0.71996				4	20.5	18.491	33192000	20183000	13009000	33135000	16871000	16264000	2534400	1659900	874460	NaN	O75947;O75947-2;F5H608	O75947;O75947-2	ATP synthase subunit d, mitochondrial	ATP5H	3
1.171	1.1084	1.0882				5	18.2	37.432	37875000	20297000	17577000	83166000	40567000	42599000	43071000	23000000	20071000	NaN	O76003	O76003	Glutaredoxin-3	GLRX3	1
NaN	1.0081	NaN				1	11	13.331	0	0	0	529970	222130	307840	0	0	0	NaN	O76070	O76070	Gamma-synuclein	SNCG	1
NaN	NaN	NaN				1	1.5	112.13	0	0	0	0	0	0	0	0	0	NaN	O94804	O94804	Serine/threonine-protein kinase 10	STK10	1
0.80835	0.6931	0.88833				3	6.6	67.454	10773000	6833500	3939400	21828000	12983000	8845500	33327000	19809000	13518000	NaN	O94826	O94826	Mitochondrial import receptor subunit TOM70	TOMM70A	1
NaN	NaN	0.60788				2	2.4	106.92	0	0	0	0	0	0	3770600	2473700	1296900	NaN	O94906;O94906-2	O94906;O94906-2	Pre-mRNA-processing factor 6	PRPF6	2
1.0184	0.85516	1.0493				2	5.4	73.46	38030000	19984000	18045000	48747000	25237000	23510000	45660000	26193000	19467000	NaN	O94925;O94925-3;O94925-2	O94925;O94925-3;O94925-2	Glutaminase kidney isoform, mitochondrial	GLS	3
0.92951	0.98949	0.88764				4	6.8	83.353	27203000	16608000	10595000	51258000	25216000	26042000	51046000	30473000	20573000	NaN	O95202;O95202-3;O95202-2	O95202;O95202-3;O95202-2	LETM1 and EF-hand domain-containing protein 1, mitochondrial	LETM1	3
0.77506	1.1157	NaN				2	11.9	27.228	3234900	2196000	1039000	4908400	2054100	2854200	0	0	0	NaN	O95292	O95292	Vesicle-associated membrane protein-associated protein B/C	VAPB	1
NaN	1.1163	1.1943				2	2.7	119.52	0	0	0	12128000	5513600	6614500	47449000	26538000	20911000	NaN	O95373	O95373	Importin-7	IPO7	1
NaN	NaN	1.069	+			1	1.6	63.523	0	0	0	0	0	0	6355900	3649900	2706000	NaN	O95470	O95470	Sphingosine-1-phosphate lyase 1	SGPL1	1
0.86391	0.78071	0.71234				5	9.1	66.9	63094000	44167000	18927000	20115000	11486000	8628900	32354000	21575000	10779000	NaN	O95831;O95831-3;O95831-4;O95831-6;O95831-2;E9PMA0;O95831-5	O95831;O95831-3;O95831-4;O95831-6	Apoptosis-inducing factor 1, mitochondrial	AIFM1	7
NaN	NaN	0.61344				2	7.2	37.893	0	0	0	0	0	0	7812800	5206900	2605900	NaN	O96008;O96008-2;K7EJ57	O96008;O96008-2;K7EJ57	Mitochondrial import receptor subunit TOM40 homolog	TOMM40	3
0.94344	0.91486	0.93476				13	27.1	39.837	1531500000	887800000	643710000	3198700000	1668400000	1530400000	2092300000	1210300000	882010000	NaN	P00338-3;P00338;P00338-2;P00338-5;P00338-4;F5GXY2;F5GYU2;F5GXH2;F5H6W8;F5H5J4;F5GZQ4;F5GXU1;F5GWW2;F5GXC7;F5H8H6	P00338-3;P00338;P00338-2;P00338-5;P00338-4;F5GXY2;F5GYU2;F5GXH2	L-lactate dehydrogenase A chain	LDHA	15
0.8246	0.8473	0.84037				15	45.7	54.861	9212300000	5766600000	3445700000	12466000000	6884900000	5580700000	10799000000	6775800000	4022700000	NaN	P00352;Q5SYQ8;Q5SYQ9	P00352	Retinal dehydrogenase 1	ALDH1A1	3
0.69657	NaN	0.62832				4	11.1	61.397	34629000	22476000	12154000	0	0	0	27878000	17995000	9883000	NaN	P00367;P49448;P00367-3;P00367-2	P00367;P49448;P00367-3;P00367-2	Glutamate dehydrogenase 1, mitochondrial;Glutamate dehydrogenase 2, mitochondrial	GLUD1;GLUD2	4
0.86701	1.0582	1.2549				4	13.6	56.256	13164000	8751300	4413200	48685000	23737000	24948000	53787000	26178000	27609000	NaN	P00390;P00390-3;P00390-2;P00390-4;P00390-5;H0YC68	P00390;P00390-3;P00390-2;P00390-4;P00390-5	Glutathione reductase, mitochondrial	GSR	6
0.92102	0.86599	0.97734				1	9.1	15.936	16877000	10032000	6844200	28475000	14770000	13704000	4553500	2665500	1888000	NaN	P00441	P00441	Superoxide dismutase [Cu-Zn]	SOD1	1
0.64687	0.74602	NaN				1	5.5	24.579	3109100	2156100	953060	7701200	4629900	3071300	0	0	0	NaN	P00492	P00492	Hypoxanthine-guanine phosphoribosyltransferase	HPRT1	1
0.60175	0.34042	0.67804				2	5.6	47.517	14050000	9407800	4642700	40612000	25442000	15170000	9766000	6520900	3245100	NaN	P00505;P00505-2	P00505;P00505-2	Aspartate aminotransferase, mitochondrial	GOT2	2
1.0163	0.99098	0.99736				15	48	44.614	867780000	505560000	362220000	831510000	419460000	412050000	783270000	452650000	330620000	NaN	P00558;P00558-2	P00558;P00558-2	Phosphoglycerate kinase 1	PGK1	2
NaN	NaN	NaN				1	18.7	11.765	0	0	0	0	0	0	0	0	0	NaN	P01834	P01834	Ig kappa chain C region	IGKC	1
NaN	0.43919	0.52491				3	7.4	74.139	0	0	0	6795700	4361700	2433900	14677000	11392000	3285200	NaN	P02545;P02545-3;P02545-6;P02545-4;P02545-2;P02545-5;Q5TCI8;A0A0C4DGC5;Q3BDU5;H0YAB0	P02545;P02545-3;P02545-6;P02545-4;P02545-2;P02545-5;Q5TCI8;A0A0C4DGC5	Prelamin-A/C;Lamin-A/C	LMNA	10
1.5762	1.4699	1.4811				3	4.9	84.87	23245000	10379000	12866000	53012000	20888000	32124000	42000000	19760000	22240000	NaN	P02786;G3V0E5;F8WBE5	P02786;G3V0E5	Transferrin receptor protein 1;Transferrin receptor protein 1, serum form	TFRC	3
0.46431	0.50527	0.52776				1	8.6	20.019	16674000	12828000	3846300	17888000	11126000	6761800	16617000	12240000	4376600	NaN	P02792	P02792	Ferritin light chain	FTL	1
0.90538	0.86541	0.85995				13	41.9	38.714	1954400000	1169400000	785000000	2638100000	1515600000	1122500000	2321100000	1417600000	903440000	NaN	P04083;Q5T3N1;Q5T3N0	P04083;Q5T3N1;Q5T3N0	Annexin A1;Annexin	ANXA1	3
2.0139	NaN	NaN				4	7.7	85.815	3741400	1757500	1983800	0	0	0	0	0	0	NaN	P04150-3;P04150;P04150-10;P04150-8;P04150-6;P04150-2;P04150-9;P04150-11;P04150-12;P04150-13;P04150-5;P04150-7;P04150-14;P04150-15;P04150-16;Q3MSN4;D6RDA9	P04150-3;P04150;P04150-10;P04150-8;P04150-6;P04150-2;P04150-9;P04150-11;P04150-12;P04150-13;P04150-5;P04150-7;P04150-14;P04150-15;P04150-16;Q3MSN4;D6RDA9	Glucocorticoid receptor	NR3C1	17
0.55086	NaN	NaN				1	2.1	48.534	7917100	5680500	2236600	0	0	0	0	0	0	NaN	P04181;P04181-2	P04181;P04181-2	Ornithine aminotransferase, mitochondrial;Ornithine aminotransferase, hepatic form;Ornithine aminotransferase, renal form	OAT	2
0.076747	0.046733	0.30114			+	7	8.7	66.038	21297000	20571000	725960	45214000	42640000	2573100	186310000	157320000	28992000	NaN	P04264;CON__P04264;CON__ENSEMBL:ENSBTAP00000038253	P04264;CON__P04264	Keratin, type II cytoskeletal 1	KRT1	3
0.90475	0.7641	0.87524				1	11.3	49.585	11872000	6952100	4920400	3739600	2038500	1701200	2348100	1296800	1051300	NaN	P04350	P04350	Tubulin beta-4A chain	TUBB4A	1
1.1627	1.1532	1.1032				7	38.2	36.053	452360000	227850000	224500000	979430000	435020000	544410000	766740000	390470000	376260000	NaN	P04406;P04406-2;E7EUT5	P04406;P04406-2;E7EUT5	Glyceraldehyde-3-phosphate dehydrogenase	GAPDH	3
1.0496	1.1341	1.0868				2	5.4	22.782	15181000	8235800	6945300	35130000	17026000	18104000	48457000	27880000	20577000	NaN	P04792	P04792	Heat shock protein beta-1	HSPB1	1
NaN	1.0218	NaN				2	3	68.569	0	0	0	31831000	15341000	16491000	0	0	0	NaN	P04843;B7Z4L4	P04843;B7Z4L4	Dolichyl-diphosphooligosaccharide--protein glycosyltransferase subunit 1	RPN1	2
NaN	0.77708	0.53712				2	2.4	112.89	0	0	0	4741400	2764500	1976900	1846400	1387600	458770	NaN	P05023;P05023-4;P05023-3;A0A0A0MT26;P54707-2;P54707;Q13733;P13637-3;P13637-2;P50993;P13637;B1AKY9;M0R116;H0Y7C1;P05023-2	P05023;P05023-4;P05023-3;A0A0A0MT26;P54707-2;P54707;Q13733;P13637-3;P13637-2;P50993;P13637;B1AKY9;M0R116;H0Y7C1;P05023-2	Sodium/potassium-transporting ATPase subunit alpha-1;Potassium-transporting ATPase alpha chain 2;Sodium/potassium-transporting ATPase subunit alpha-4;Sodium/potassium-transporting ATPase subunit alpha-2;Sodium/potassium-transporting ATPase subunit alpha-3	ATP1A1;ATP12A;ATP1A4;ATP1A2;ATP1A3	15
0.9035	1.0248	0.99923				6	17	56.381	175460000	104140000	71321000	180360000	81572000	98784000	199040000	116770000	82275000	NaN	P05091;P05091-2;F8VP50;S4R3S4	P05091;P05091-2;F8VP50	Aldehyde dehydrogenase, mitochondrial	ALDH2	4
1.6616	0.72654	0.70898				3	25	12.435	5270000	2403700	2866300	2249100	1039600	1209500	2007800	1358600	649140	NaN	A6NEL0;P05114;A6NL93;H7BXJ5;F2Z2Y5;F2Z2W6	A6NEL0;P05114;A6NL93	Non-histone chromosomal protein HMG-14	HMGN1	6
0.39462	NaN	NaN				1	4	45.059	667970	536560	131410	0	0	0	0	0	0	NaN	P05121;P05121-2	P05121;P05121-2	Plasminogen activator inhibitor 1	SERPINE1	2
0.96408	0.88878	0.8501				2	10.7	32.852	214530000	127050000	87488000	195260000	110200000	85061000	182230000	109840000	72389000	NaN	P05141;P12235;V9GYG0	P05141	ADP/ATP translocase 2	SLC25A5	3
NaN	1.2564	NaN				1	28.9	11.514	0	0	0	890560	441160	449400	0	0	0	NaN	P05386	P05386	60S acidic ribosomal protein P1	RPLP1	1
1.2169	1.2393	1.0738				3	67.8	11.665	21648000	11220000	10428000	60851000	26275000	34576000	6642200	3822300	2820000	NaN	P05387;H0YDD8;P05386-2	P05387;H0YDD8	60S acidic ribosomal protein P2	RPLP2	3
1.2155	1.1512	1.2677				6	18.6	46.836	72339000	39023000	33317000	102350000	47918000	54435000	92681000	47683000	44998000	NaN	P05455;E7ERC4;E9PFL9;E9PGX9	P05455;E7ERC4	Lupus La protein	SSB	4
1.3792	1.2697	1.2962				3	4	88.414	36067000	17904000	18163000	74114000	34219000	39895000	100050000	51420000	48633000	NaN	P05556;P05556-3;P05556-4;P05556-5;P05556-2	P05556;P05556-3;P05556-4;P05556-5;P05556-2	Integrin beta-1	ITGB1	5
0.83999	0.83075	0.84889				4	12.1	56.559	414100000	253250000	160850000	580290000	317610000	262680000	578710000	351340000	227370000	NaN	P06576;H0YH81;F8W079;F8W0P7;H0YI37	P06576;H0YH81;F8W079	ATP synthase subunit beta, mitochondrial;ATP synthase subunit beta	ATP5B	5
0.83145	0.84252	0.86723				13	28.8	47.168	1814500000	1121100000	693430000	1232100000	646410000	585680000	1648800000	1000600000	648250000	NaN	P06733;P06733-2;K7EM90	P06733;P06733-2	Alpha-enolase	ENO1	3
0.93894	0.89378	0.94388				4	8.8	32.575	45952000	26941000	19011000	131780000	69301000	62482000	33863000	20207000	13655000	NaN	P06748;P06748-2;P06748-3;E5RI98	P06748;P06748-2;P06748-3	Nucleophosmin	NPM1	4
0.7768	0.82811	0.70187				3	13.3	29.032	108050000	68229000	39820000	95320000	55218000	40103000	173330000	108690000	64641000	NaN	P06753-2;P06753-5;Q5HYB6;Q5VU61;J3KN67;P06753-6;P06753-3;P06753-4;A0A087WWU8;P06753-7;P06753;D6R904;D6RFM2	P06753-2;P06753-5;Q5HYB6;Q5VU61;J3KN67;P06753-6;P06753-3;P06753-4;A0A087WWU8;P06753-7		DKFZp686J1372;TPM3	13
1.5892	1.4877	1.5251				2	4.4	52.948	257970000	123590000	134380000	293530000	117430000	176090000	275270000	129090000	146170000	NaN	P07099	P07099	Epoxide hydrolase 1	EPHX1	1
0.9241	0.88373	0.91438				12	31.7	36.638	1430800000	825440000	605360000	3347200000	1722000000	1625200000	2480700000	1452700000	1028000000	NaN	P07195;A8MW50;C9J7H8;F5H793	P07195;A8MW50;C9J7H8;F5H793	L-lactate dehydrogenase B chain;L-lactate dehydrogenase	LDHB	4
NaN	0.29824	NaN				1	9.8	44.796	0	0	0	652890	590210	62680	0	0	0	NaN	P07205	P07205	Phosphoglycerate kinase 2	PGK2	1
0.5277	0.61859	0.76909				2	7.2	20.863	3816500	2678100	1138400	4121300	2483900	1637300	9210500	5898200	3312300	NaN	P07305	P07305	Histone H1.0	H1F0	1
0.95071	0.12232	1.0503				1	14	49.67	63858000	36574000	27284000	11167000	9940900	1226400	55149000	26752000	28396000	NaN	P07437;Q5JP53;Q5ST81;Q9BUF5;K7ESM5;G3V2A3	P07437;Q5JP53;Q5ST81	Tubulin beta chain	TUBB	6
0.91549	0.9933	1.1746				9	10.3	170.59	92470000	54071000	38399000	112740000	55069000	57667000	147920000	64134000	83784000	NaN	P07814;V9GYZ6;V9GZ76	P07814;V9GYZ6	Bifunctional glutamate/proline--tRNA ligase;Glutamate--tRNA ligase;Proline--tRNA ligase	EPRS	3
1.1913	1.3502	1.3979				2	6.5	37.821	161440000	93251000	68192000	55290000	23255000	32035000	45159000	24372000	20787000	NaN	P07858	P07858	Cathepsin B;Cathepsin B light chain;Cathepsin B heavy chain	CTSB	1
0.97831	0.95231	0.98328				8	17.4	98.16	1975500000	1114400000	861130000	3988700000	2034900000	1953800000	3943200000	2263100000	1680100000	NaN	P07900-2;P07900;Q58FG0;G3V2J8;Q14568	P07900-2;P07900	Heat shock protein HSP 90-alpha	HSP90AA1	5
0.44257	NaN	NaN				1	1.8	54.636	10718000	6853800	3863900	0	0	0	0	0	0	NaN	P07954;P07954-2	P07954;P07954-2	Fumarate hydratase, mitochondrial	FH	2
1.6458	1.3504	1.6448				6	8.3	71.122	235950000	117070000	118880000	283990000	110890000	173110000	347290000	163850000	183440000	NaN	P08195-4;J3KPF3;P08195;F5GZS6;P08195-3;P08195-2;H0YFS2;F5H0E2;F5H867;F5GZR9	P08195-4;J3KPF3;P08195;F5GZS6;P08195-3;P08195-2;H0YFS2;F5H0E2;F5H867	4F2 cell-surface antigen heavy chain	SLC3A2	10
1.0486	1.007	1.0681				2	17	83.263	339260000	183370000	155890000	387390000	191240000	196140000	511910000	286980000	224930000	NaN	P08238;Q58FF7	P08238;Q58FF7	Heat shock protein HSP 90-beta;Putative heat shock protein HSP 90-beta-3	HSP90AB1;HSP90AB3P	2
NaN	0.7333	NaN				1	4.9	25.486	0	0	0	142340	84944	57398	0	0	0	NaN	P08579	P08579	U2 small nuclear ribonucleoprotein B	SNRPB2	1
1.1019	1.1098	1.1296				3	21.4	23.356	194850000	108290000	86564000	159730000	79532000	80199000	151840000	86370000	65469000	NaN	P09211;A8MX94;A0A087X2E9;A0A087X243	P09211;A8MX94;A0A087X2E9	Glutathione S-transferase P	GSTP1	4
1.0281	1.0984	1.0453				7	27.4	24.893	86120000	50090000	36030000	264490000	135060000	129430000	208730000	122390000	86343000	NaN	P09429;Q5T7C4;B2RPK0	P09429;Q5T7C4	High mobility group protein B1	HMGB1	3
NaN	NaN	0.42809				2	9.5	37.452	0	0	0	0	0	0	2891500	2066000	825510	NaN	Q6ZN40;P09493;P09493-10;P09493-3;P09493-4;P09493-6;P09493-7;P09493-8;P09493-9;B7Z596;H0YL52;H0YK48;H7BYY1;F5H7S3;P09493-5;P09493-2;H0YNC7;H0YKP3;H0YL42;A0A087WTJ7;H0YKZ6;H0YLS7	Q6ZN40;P09493;P09493-10;P09493-3;P09493-4;P09493-6;P09493-7;P09493-8;P09493-9;B7Z596;H0YL52;H0YK48;H7BYY1;F5H7S3;P09493-5;P09493-2;H0YNC7;H0YKP3;H0YL42;A0A087WTJ7;H0YKZ6;H0YLS7	Tropomyosin alpha-1 chain	TPM1	22
NaN	1.5783	1.1019				3	10.3	35.882	0	0	0	12381000	4605400	7775300	300080	152110	147970	NaN	P09525;Q6P452;P09525-2	P09525;Q6P452;P09525-2	Annexin A4;Annexin	ANXA4	3
0.84143	1.1335	NaN				1	3.6	47.578	9118400	5710700	3407700	11144000	4814900	6329000	0	0	0	NaN	P09543;P09543-2	P09543;P09543-2	2,3-cyclic-nucleotide 3-phosphodiesterase	CNP	2
0.86431	0.98838	0.96114				7	9.5	113.08	59341000	37028000	22313000	72222000	36263000	35959000	139980000	85920000	54062000	NaN	P09874	P09874	Poly [ADP-ribose] polymerase 1	PARP1	1
1.0735	0.89398	1.1083				5	9	69.284	61222000	34647000	26575000	34551000	14342000	20209000	84448000	46822000	37626000	NaN	P09960;P09960-4;P09960-2;P09960-3	P09960;P09960-4;P09960-2;P09960-3	Leukotriene A-4 hydrolase	LTA4H	4
0.83849	0.5414	NaN				1	19.7	6.0943	248890	152020	96871	201170	134470	66699	0	0	0	NaN	P0DM35;P80294	P0DM35;P80294	Metallothionein-1H	MT1H	2
0.59212	0.58622	0.65297				2	11	23.48	24451000	17548000	6903200	16800000	10823000	5977700	33284000	23480000	9803600	NaN	P10301	P10301	Ras-related protein R-Ras	RRAS	1
NaN	0.59365	0.53413				1	17.8	21.865	0	0	0	4955600	2777100	2178500	4106400	2936700	1169700	NaN	P10412	P10412	Histone H1.4	HIST1H1E	1
NaN	1.507	NaN				1	2.6	56.232	0	0	0	8428300	2890900	5537400	0	0	0	NaN	X6R8A1;X6R5C5;P10619;P10619-2	X6R8A1;X6R5C5;P10619;P10619-2	Lysosomal protective protein;Lysosomal protective protein 32 kDa chain;Lysosomal protective protein 20 kDa chain	CTSA	4
1.1831	0.89804	NaN				3	11.7	31.462	18176000	10261000	7915000	27601000	14411000	13191000	0	0	0	NaN	P10768;X6RA14;H7BZT7;U3KQT1	P10768;X6RA14;H7BZT7;U3KQT1	S-formylglutathione hydrolase	ESD	4
0.83536	0.80785	0.85891				14	27.4	61.054	926420000	580740000	345680000	744880000	411870000	333010000	1063100000	661880000	401200000	NaN	P10809;E7ESH4;E7EXB4	P10809	60 kDa heat shock protein, mitochondrial	HSPD1	3
1.1727	1.1138	1.0981				10	15.9	72.332	453430000	242790000	210640000	275580000	131070000	144520000	642560000	346870000	295690000	NaN	P11021	P11021	78 kDa glucose-regulated protein	HSPA5	1
NaN	NaN	NaN				1	0.9	177.6	0	0	0	0	0	0	0	0	0	NaN	P11047	P11047	Laminin subunit gamma-1	LAMC1	1
0.84567	0.97469	0.96756				3	8.6	39.233	72563000	39113000	33450000	54147000	26777000	27370000	74330000	40357000	33973000	NaN	P11177;P11177-2;P11177-3;C9J634;F8WF02	P11177;P11177-2;P11177-3;C9J634;F8WF02	Pyruvate dehydrogenase E1 component subunit beta, mitochondrial	PDHB	5
NaN	NaN	NaN				2	2.7	90.725	0	0	0	0	0	0	1888700	967810	920920	NaN	P11387;Q969P6;Q969P6-2;E5RIC7	P11387;Q969P6;Q969P6-2;E5RIC7	DNA topoisomerase 1;DNA topoisomerase I, mitochondrial	TOP1;TOP1MT	4
1.0565	1.2744	1.129				3	8	63.826	40400000	22871000	17529000	48186000	23649000	24537000	68924000	36612000	32313000	NaN	P11413-2;P11413-3;P11413;E7EUI8	P11413-2;P11413-3;P11413	Glucose-6-phosphate 1-dehydrogenase	G6PD	4
NaN	0.69588	0.70373				2	10.7	32.866	0	0	0	13592000	8260100	5331500	2403600	1512000	891560	NaN	P12236	P12236	ADP/ATP translocase 3	SLC25A6	1
NaN	NaN	NaN	+			1	3.2	74.784	3105400	3105400	0	0	0	0	0	0	0	NaN	P12757-5	P12757-5			1
0.88275	0.83568	4.1817				1	3.2	54.548	57843000	36638000	21204000	14505000	9681800	4823500	18225000	9338300	8886500	NaN	P12955;P12955-2;P12955-3	P12955;P12955-2;P12955-3	Xaa-Pro dipeptidase	PEPD	3
0.98441	1.0551	1.0675				5	8.5	69.842	151950000	87121000	64832000	117770000	57889000	59878000	246150000	135980000	110160000	NaN	P12956;P12956-2;B1AHC9	P12956;P12956-2;B1AHC9	X-ray repair cross-complementing protein 6	XRCC6	3
0.98213	0.97021	1.0058				9	13.1	82.704	155520000	92898000	62623000	217270000	110020000	107260000	333710000	190350000	143350000	NaN	P13010	P13010	X-ray repair cross-complementing protein 5	XRCC5	1
1.0506	1.2095	1.509				1	2.2	49.973	16512000	9221100	7291100	4575800	2265400	2310400	4349100	2036400	2312700	NaN	P13489	P13489	Ribonuclease inhibitor	RNH1	1
1.0691	1.4021	1.0481				7	7.5	95.337	132020000	53787000	78230000	174920000	70671000	104250000	316370000	148660000	167710000	NaN	P13639	P13639	Elongation factor 2	EEF2	1
0.92935	0.94224	0.95407				9	18.4	72.932	151090000	87992000	63100000	120350000	62474000	57876000	124900000	72964000	51936000	NaN	P13667	P13667	Protein disulfide-isomerase A4	PDIA4	1
1.285	0.69639	0.71735				1	14.7	35.079	54581000	36924000	17658000	86958000	54741000	32218000	197900000	135280000	62616000	NaN	P13804;P13804-2;H0YK49;H0YL83	P13804;P13804-2;H0YK49	Electron transfer flavoprotein subunit alpha, mitochondrial	ETFA	4
0.91856	1.0041	0.99244				2	6.8	36.573	766710000	351630000	415080000	1223800000	599830000	623950000	1185100000	765260000	419880000	NaN	P14550;Q5T621;V9GYP9;V9GYG2	P14550;Q5T621;V9GYP9;V9GYG2	Alcohol dehydrogenase [NADP(+)]	AKR1A1	4
1.041	1.1187	1.1158				11	18.8	57.936	1783600000	993910000	789700000	1550500000	741290000	809220000	3885100000	2100600000	1784400000	NaN	P14618;P14618-3;P14618-2;H3BTN5;B4DNK4;H3BQ34;H3BR70;H3BTJ2;H3BUW1;H3BT25	P14618;P14618-3;P14618-2;H3BTN5;B4DNK4;H3BQ34	Pyruvate kinase isozymes M1/M2;Pyruvate kinase	PKM2	10
0.89792	0.88294	0.84754				9	11.6	92.468	281350000	168450000	112900000	512060000	265490000	246570000	682330000	393550000	288790000	NaN	P14625;Q96GW1;H0YIV0;F8W026	P14625	Endoplasmin	HSP90B1	4
0.47436	0.50028	0.55646				1	8.7	64.132	6658300	5071400	1586900	4383100	2902300	1480800	12327000	8304800	4022100	NaN	P14866;M0QXS5;P14866-2;M0R076	P14866;M0QXS5;P14866-2;M0R076	Heterogeneous nuclear ribonucleoprotein L	HNRNPL	4
NaN	1.0528	1.069				1	2.6	57.136	0	0	0	10411000	4381800	6029200	6372000	3366400	3005600	NaN	P14868;P14868-2	P14868;P14868-2	Aspartate--tRNA ligase, cytoplasmic	DARS	2
0.90419	0.92122	0.98276				6	19.6	35.853	1901500000	1127800000	773620000	1923900000	991970000	931970000	2164200000	1233600000	930590000	NaN	P15121;E9PCX2;E9PEF9	P15121;E9PCX2	Aldose reductase	AKR1B1	3
0.82427	0.85608	NaN				1	3.9	28.804	37264	24716	12548	44538	23895	20643	0	0	0	NaN	P18669;P15259	P18669;P15259	Phosphoglycerate mutase 1;Phosphoglycerate mutase 2	PGAM1;PGAM2	2
NaN	NaN	NaN				1	5.6	28.977	0	0	0	0	0	0	0	0	0	NaN	P15428;P15428-5;P15428-3	P15428;P15428-5;P15428-3	15-hydroxyprostaglandin dehydrogenase [NAD(+)]	HPGD	3
1.5013	1.4613	1.5585				5	17.7	31.324	165560000	77829000	87730000	118270000	50888000	67385000	206090000	96194000	109900000	NaN	P15880;E9PQD7;H0YEN5;E9PMM9;E9PPT0;E9PM36;I3L404	P15880;E9PQD7;H0YEN5	40S ribosomal protein S2	RPS2	7
NaN	NaN	NaN				1	0.5	331.77	0	0	0	0	0	0	0	0	0	NaN	P15924	P15924	Desmoplakin	DSP	1
1.0943	1.1859	1.0724				2	9.4	30.375	32150000	18600000	13550000	56953000	28684000	28269000	45762000	24403000	21359000	NaN	P16152;A8MTM1;E9PQ63;P16152-2	P16152;A8MTM1;E9PQ63;P16152-2	Carbonyl reductase [NADPH] 1	CBR1	4
0.95578	1.6182	0.99424				2	2.8	76.074	21643000	12560000	9083000	2205900	982880	1223000	32154000	18168000	13986000	NaN	P16278;P16278-3;E7EQ29;P16278-2;C9J539	P16278;P16278-3;E7EQ29;P16278-2;C9J539	Beta-galactosidase	GLB1	5
0.58264	0.57312	0.62525				2	20.2	21.364	247460000	176790000	70669000	275040000	186210000	88826000	120360000	82640000	37717000	NaN	P16403;P16402;Q02539;P22492	P16403;P16402	Histone H1.2;Histone H1.3	HIST1H1C;HIST1H1D	4
0.42071	0.42025	0.46679				3	27.5	17.302	41266000	28556000	12711000	47824000	30706000	17117000	54790000	39735000	15055000	NaN	P16949;P16949-2;A2A2D0	P16949;P16949-2;A2A2D0	Stathmin	STMN1	3
NaN	NaN	NaN				1	5.1	40.089	0	0	0	0	0	0	0	0	0	NaN	P16989;P16989-2	P16989;P16989-2	DNA-binding protein A	CSDA	2
NaN	0.82093	NaN				1	4.6	46.247	0	0	0	1388800	746170	642610	0	0	0	NaN	P17174	P17174	Aspartate aminotransferase, cytoplasmic	GOT1	1
0.82955	0.52046	0.63275				1	2	66.69	11012000	7023600	3988000	4902300	3361000	1541200	7547600	4846000	2701600	NaN	P17812;Q9NRF8;P17812-2	P17812;Q9NRF8;P17812-2	CTP synthase 1;CTP synthase 2	CTPS;CTPS2	3
2.9265	1.525	1.4042				4	15.7	29.225	44498000	22964000	21534000	57897000	25516000	32382000	71524000	38491000	33033000	NaN	P18124;A8MUD9;C9JIJ5;C9JZ88	P18124;A8MUD9	60S ribosomal protein L7	RPL7	4
0.90491	0.8088	0.85693				6	6.1	123.8	296990000	173220000	123770000	186230000	109390000	76841000	309520000	191210000	118310000	NaN	P18206;P18206-2;Q5JQ13;P18206-3	P18206;P18206-2;Q5JQ13	Vinculin	VCL	4
1.1091	1.2278	1.1776				13	22	76.613	381990000	211850000	170140000	509400000	227080000	282320000	830140000	425960000	404180000	NaN	P19338;H7BY16;C9JWL1;C9J1H7;C9JLB1;C9JYW2	P19338;H7BY16	Nucleolin	NCL	6
1.1679	NaN	NaN				1	4.5	38.388	2969300	1321500	1647800	0	0	0	0	0	0	NaN	P20042	P20042	Eukaryotic translation initiation factor 2 subunit 2	EIF2S2	1
0.8514	1.0677	1.0492				1	11.6	23.658	37666000	22489000	15177000	65359000	33464000	31895000	79091000	48922000	30170000	NaN	P20339;P20339-2;K7ERQ8;P61020;P61020-2;K7ERI8;F8VVK3;F8VUA5;F8VVZ0;F8VWU4;F8VWZ7;F8VSF8;F8VPW9;F8WD79;F8WCY6	P20339;P20339-2;K7ERQ8;P61020;P61020-2;K7ERI8;F8VVK3;F8VUA5;F8VVZ0;F8VWU4;F8VWZ7;F8VSF8;F8VPW9;F8WD79;F8WCY6	Ras-related protein Rab-5A;Ras-related protein Rab-5B	RAB5A;RAB5B;RAB5C	15
0.69532	0.55504	0.62857				8	54.4	20.567	51837000	35399000	16438000	67989000	46006000	21984000	36086000	25095000	10991000	NaN	P21291;E9PP21;E9PND2;E9PS42	P21291;E9PP21;E9PND2;E9PS42	Cysteine and glycine-rich protein 1	CSRP1	4
0.93627	0.92318	0.9473				29	15.1	280.74	2166000000	1327400000	838520000	5243400000	2874600000	2368800000	4263200000	2562000000	1701200000	NaN	P21333;P21333-2;Q60FE5;Q5HY54;A0A087WWY3;F8WE98;H0Y5C6;H0Y5F3	P21333;P21333-2;Q60FE5;Q5HY54;A0A087WWY3	Filamin-A	FLNA	8
0.95809	1.0859	1.1437				3	3.9	98.398	25425000	14523000	10902000	61104000	29460000	31644000	38073000	20200000	17872000	NaN	P21399	P21399	Cytoplasmic aconitate hydratase	ACO1	1
0.73302	0.68631	0.64028				7	31.1	30.772	69644000	44519000	25125000	247280000	148470000	98807000	102800000	69337000	33466000	NaN	P21796;C9JI87	P21796;C9JI87	Voltage-dependent anion-selective channel protein 1	VDAC1	2
0.58359	0.71996	0.65728				6	9.6	77.328	338930000	220170000	118760000	299480000	172020000	127460000	368670000	251030000	117640000	NaN	P21980;P21980-2	P21980	Protein-glutamine gamma-glutamyltransferase 2	TGM2	2
1.8701	NaN	5.1967				1	1.3	83.134	2531200	1073000	1458300	0	0	0	5281700	831350	4450300	NaN	P22033	P22033	Methylmalonyl-CoA mutase, mitochondrial	MUT	1
1.0481	0.97799	0.95222				3	5.3	117.85	53042000	35046000	17996000	54977000	26042000	28935000	73854000	39548000	34306000	NaN	P22314;P22314-2;Q5JRR6	P22314;P22314-2;Q5JRR6	Ubiquitin-like modifier-activating enzyme 1	UBA1	3
0.92757	0.92646	0.95164				6	25	32.642	227320000	129350000	97972000	204600000	104630000	99965000	150070000	85069000	65005000	NaN	Q32Q12;P22392-2;P22392;J3KPD9;O60361;P15531-2;P15531;E7ERL0;E5RHP0;F6XY72	Q32Q12;P22392-2;P22392;J3KPD9;O60361	Nucleoside diphosphate kinase;Nucleoside diphosphate kinase B;Putative nucleoside diphosphate kinase	NME1-NME2;NME2;NME2P1	10
0.81137	0.73693	0.65922				4	14.8	48.442	84816000	54271000	30546000	47339000	27581000	19758000	49437000	32724000	16713000	NaN	P22695;H3BRG4;H3BSJ9;H3BUI9;H3BUE4	P22695;H3BRG4;H3BSJ9	Cytochrome b-c1 complex subunit 2, mitochondrial	UQCRC2	5
1.1057	1.1459	1.0361				7	33.3	23.742	156500000	82830000	73667000	300010000	135840000	164170000	122560000	66282000	56280000	NaN	P23284	P23284	Peptidyl-prolyl cis-trans isomerase B	PPIB	1
NaN	1.2495	1.3239				2	6.6	53.165	0	0	0	8640000	3631200	5008800	31702000	15994000	15708000	NaN	P23381;P23381-2;G3V277;H0YJP3;G3V227;G3V3P2;G3V3X0;G3V3S7;G3V5W1;G3V4N8;G3V4C7;G3V2C0;G3V339;G3V313;G3V4S4;G3V3R3;G3V2F2	P23381;P23381-2;G3V277;H0YJP3;G3V227;G3V3P2;G3V3X0;G3V3S7;G3V5W1;G3V4N8;G3V4C7;G3V2C0;G3V339;G3V313;G3V4S4;G3V3R3;G3V2F2	Tryptophan--tRNA ligase, cytoplasmic;T1-TrpRS;T2-TrpRS	WARS	17
NaN	2.2752	NaN				1	1.5	162	0	0	0	107880	39968	67908	0	0	0	NaN	P23470;P23470-2	P23470;P23470-2	Receptor-type tyrosine-protein phosphatase gamma	PTPRG	2
1.0636	0.83884	1.0753				6	17.8	47.716	361490000	203490000	158000000	388240000	197240000	191000000	183850000	103780000	80064000	NaN	P23526;P23526-2	P23526;P23526-2	Adenosylhomocysteinase	AHCY	2
0.95858	0.91893	0.86628				9	41.7	22.728	408830000	224050000	184770000	619490000	315580000	303910000	277540000	170090000	107460000	NaN	E9PK25;P23528;E9PP50;G3V1A4;E9PQB7;E9PS23;E9PLJ3;Q9Y281;Q9Y281-3	E9PK25;P23528;E9PP50;G3V1A4;E9PQB7;E9PS23;E9PLJ3	Cofilin-1	CFL1	9
NaN	NaN	NaN				1	8	24.763	0	0	0	0	0	0	0	0	0	NaN	P24534	P24534	Elongation factor 1-beta	EEF1B2	1
0.89874	0.97456	0.90549				6	24.2	28.908	50702000	31702000	19001000	48751000	26119000	22632000	45673000	27484000	18189000	NaN	P24539;Q5QNZ2	P24539;Q5QNZ2	ATP synthase subunit b, mitochondrial	ATP5F1	2
1.0599	0.91201	0.98796				3	8.1	59.75	90144000	54308000	35836000	228750000	126290000	102460000	88704000	56726000	31979000	NaN	P25705;P25705-3;P25705-2;K7EK77;K7ERX7;K7EJP1;K7EQH4	P25705;P25705-3;P25705-2	ATP synthase subunit alpha, mitochondrial	ATP5A1	7
0.85653	0.81777	0.8113				5	10.2	67.819	211990000	132670000	79317000	28790000	16263000	12527000	134130000	88772000	45359000	NaN	P26038;V9GZ54	P26038	Moesin	MSN	2
0.87959	0.78926	0.96019				4	19.6	24.033	5653100	3648000	2005100	43063000	24042000	19021000	38002000	23263000	14739000	NaN	P26583;D6R9A6	P26583;D6R9A6	High mobility group protein B2	HMGB2	2
1.4453	1.1742	1.5935				3	6.6	83.434	112800	50742	62063	17704000	8374500	9329100	31899000	15779000	16120000	NaN	P26639;P26639-2;D6R9F8;D6RDJ6;D6RCA5;D6RCS6;D6RHV7;D6RJ97	P26639;P26639-2;D6R9F8	Threonine--tRNA ligase, cytoplasmic	TARS	8
1.0345	1.0314	1.1219				5	10.1	56.149	194660000	111740000	82914000	80779000	40507000	40272000	111880000	62056000	49823000	NaN	P26641-2;P26641	P26641-2;P26641	Elongation factor 1-gamma	EEF1G	2
1.0666	1.023	1.0479				3	12.7	27.764	101700000	57903000	43795000	178680000	93180000	85501000	168570000	95562000	73006000	NaN	P27348;E9PG15	P27348	14-3-3 protein theta	YWHAQ	2
0.98913	0.79264	1.0157				7	31.2	48.141	73112000	42374000	30738000	158480000	87269000	71210000	90778000	52517000	38261000	NaN	P27797;K7EJB9;K7EL50	P27797;K7EJB9	Calreticulin	CALR	3
1.0419	0.7936	0.97482				5	9.6	71.502	166410000	93471000	72936000	190470000	93332000	97140000	196490000	108460000	88025000	NaN	P27824-2;P27824;P27824-3;D6RGY2;H0Y9H1;D6RFL1;H0Y9Q7	P27824-2;P27824;P27824-3;D6RGY2	Calnexin	CANX	7
0.79355	NaN	0.64209				2	4	80.996	855690	523090	332600	0	0	0	3656500	2557500	1099000	NaN	P28331-2;P28331;P28331-5;P28331-4;P28331-3;B4DJ81;C9JPQ5	P28331-2;P28331;P28331-5;P28331-4;P28331-3;B4DJ81;C9JPQ5	NADH-ubiquinone oxidoreductase 75 kDa subunit, mitochondrial	NDUFS1	7
NaN	NaN	1.2557				2	2.1	139.76	0	0	0	0	0	0	4122400	2005300	2117100	NaN	Q5VZU9;P29144	Q5VZU9;P29144	Tripeptidyl-peptidase 2	TPP2	2
NaN	0.42946	NaN				2	3	108.27	0	0	0	2109700	1655500	454230	0	0	0	NaN	P29317	P29317	Ephrin type-A receptor 2	EPHA2	1
1.2	1.1564	1.1362				8	19	68.813	828930000	441210000	387730000	623640000	282030000	341620000	1049500000	549390000	500080000	NaN	P29401-2;P29401;A0A0B4J1R6;E9PFF2;F8W888;F8WAX4	P29401-2;P29401;A0A0B4J1R6;E9PFF2	Transketolase	TKT	6
1.6719	1.5909	1.6482				7	35.2	31.554	58460000	24989000	33471000	63132000	24189000	38943000	102230000	45781000	56447000	NaN	P29966	P29966	Myristoylated alanine-rich C-kinase substrate	MARCKS	1
1.1733	1.0493	1.1572				3	12.3	28.993	32120000	17291000	14829000	61700000	31504000	30196000	73205000	42746000	30459000	NaN	P30040;F8VY02;F8W1G0;P30040-2	P30040	Endoplasmic reticulum resident protein 29	ERP29	4
1.0073	0.97946	1.0319				2	13.4	25.035	4259500	2505200	1754300	10293000	4426600	5866700	35357000	19750000	15607000	NaN	P30041	P30041	Peroxiredoxin-6	PRDX6	1
0.93071	0.93119	0.99991				3	22.4	22.086	12453000	5327200	7125400	29886000	10855000	19031000	5077400	2985700	2091600	NaN	P30044;P30044-2;P30044-3	P30044;P30044-2;P30044-3	Peroxiredoxin-5, mitochondrial	PRDX5	3
0.88971	0.93263	0.72341				3	7.8	27.692	51990000	31867000	20123000	75644000	41279000	34365000	56714000	33761000	22953000	NaN	P30048;P30048-2	P30048;P30048-2	Thioredoxin-dependent peroxide reductase, mitochondrial	PRDX3	2
1.1777	1.239	1.1943				1	5.5	17.818	119140000	63274000	55861000	190710000	84694000	106010000	86992000	45165000	41828000	NaN	P30050	P30050	60S ribosomal protein L12	RPL12	1
0.94291	0.89406	0.93978				4	15.2	31.387	45082000	25919000	19163000	47205000	23548000	23657000	37500000	23036000	14464000	NaN	P30084	P30084	Enoyl-CoA hydratase, mitochondrial	ECHS1	1
1.1095	1.1716	0.94672				5	35.3	21.057	101760000	57204000	44557000	200290000	95341000	104950000	53321000	29672000	23649000	NaN	P30086	P30086	Phosphatidylethanolamine-binding protein 1;Hippocampal cholinergic neurostimulating peptide	PEBP1	1
0.92601	1.0661	0.89631				5	15.2	56.782	182910000	105260000	77659000	262080000	129330000	132750000	197930000	115930000	81997000	NaN	P30101;H7BZJ3	P30101	Protein disulfide-isomerase A3	PDIA3	2
1.0635	0.98495	0.66148				2	5.4	56.806	774530	468520	306010	256430	132560	123870	562400	382660	179740	NaN	P30419;O60551;Q5VUC6;P30419-2;B7Z8J4;K7EN42	P30419;O60551;Q5VUC6;P30419-2;B7Z8J4;K7EN42	Glycylpeptide N-tetradecanoyltransferase 1;Glycylpeptide N-tetradecanoyltransferase 2;Glycylpeptide N-tetradecanoyltransferase	NMT1;NMT2	6
1.0331	1.0799	1.1792				2	6.6	42.741	10496000	5992800	4503200	7353900	3457700	3896200	7327500	4012100	3315300	NaN	P30740;P30740-2	P30740;P30740-2	Leukocyte elastase inhibitor	SERPINB1	2
0.85751	NaN	0.8557				2	6.2	57.206	6168000	4102400	2065600	0	0	0	6783600	4661400	2122200	NaN	P30837	P30837	Aldehyde dehydrogenase X, mitochondrial	ALDH1B1	1
0.86623	NaN	NaN				2	9.8	50.582	2897500	1735500	1162000	0	0	0	0	0	0	NaN	P31150;G5E9U5	P31150	Rab GDP dissociation inhibitor alpha	GDI1	2
1.7794	1.0272	1.5172				2	5.3	44.868	12365000	5796200	6568900	10373000	4729900	5643600	12037000	7369700	4667200	NaN	P31689;P31689-2	P31689;P31689-2	DnaJ homolog subfamily A member 1	DNAJA1	2
NaN	NaN	NaN				1	4.4	52.645	0	0	0	0	0	0	0	0	0	NaN	P31930	P31930	Cytochrome b-c1 complex subunit 1, mitochondrial	UQCRC1	1
1.0444	0.91016	0.95225				3	10.1	35.329	6390800	3515100	2875700	6692600	3453100	3239600	23738000	14499000	9239100	NaN	P31937;H7BZL2	P31937;H7BZL2	3-hydroxyisobutyrate dehydrogenase, mitochondrial	HIBADH	2
1.1919	1.1602	1.0233				3	6.2	64.615	88182000	46216000	41967000	55391000	27369000	28022000	143670000	79499000	64167000	NaN	P31939;P31939-2;H7C1S2	P31939;P31939-2;H7C1S2	Bifunctional purine biosynthesis protein PURH;Phosphoribosylaminoimidazolecarboxamide formyltransferase;IMP cyclohydrolase	ATIC	3
1.1993	1.2368	1.1723				5	23.2	28.082	58540000	31839000	26701000	138620000	64426000	74192000	218730000	118960000	99774000	NaN	P31946;P31946-2;A0A0J9YWE8;Q4VY19;Q4VY20	P31946;P31946-2	14-3-3 protein beta/alpha;14-3-3 protein beta/alpha, N-terminally processed	YWHAB	5
0.84553	0.97816	0.85244				6	8.7	62.639	164920000	105180000	59740000	57083000	30333000	26751000	147180000	87904000	59275000	NaN	P31948;P31948-3;P31948-2;F5H783;F5GXD8	P31948;P31948-3;P31948-2;F5H783	Stress-induced-phosphoprotein 1	STIP1	5
0.92334	0.97395	1.0721				8	8	109.68	89477000	54047000	35430000	33352000	17152000	16200000	48984000	28930000	20055000	NaN	P33176;Q12840;O60282;J3KNA1;A0A0G2JMZ6;O60282-2	P33176	Kinesin-1 heavy chain	KIF5B	6
1.2526	NaN	NaN				2	3.2	81.307	3655300	2097200	1558100	0	0	0	0	0	0	NaN	P33993;P33993-2	P33993;P33993-2	DNA replication licensing factor MCM7	MCM7	2
NaN	NaN	0.70452				1	2.9	53.082	0	0	0	0	0	0	14215000	9870700	4344500	NaN	P34896;P34896-2;P34896-3;P34896-4	P34896;P34896-2;P34896-3;P34896-4	Serine hydroxymethyltransferase, cytosolic	SHMT1	4
0.88972	0.9468	1.0451				11	18.6	94.33	38105000	22217000	15888000	112470000	57700000	54769000	146070000	81689000	64377000	NaN	P34932;A0A087WYC1;A0A087WTS8;O95757;E9PDE8;P34932-2	P34932;A0A087WYC1	Heat shock 70 kDa protein 4	HSPA4	6
1.1452	NaN	NaN				2	2.6	102.63	5277500	2758600	2518800	0	0	0	0	0	0	NaN	P35221-2;P35221;P35221-3;P26232;P26232-5;P26232-2;Q9UI47;P26232-3;G3XAM7;P26232-6;A0A0A0MRI5;P26232-4;A0A0A0MTJ6;E5RGY7	P35221-2;P35221;P35221-3;P26232;P26232-5;P26232-2;Q9UI47;P26232-3;G3XAM7;P26232-6;A0A0A0MRI5;P26232-4;A0A0A0MTJ6;E5RGY7	Catenin alpha-1;Catenin alpha-2;Catenin alpha-3	CTNNA1;CTNNA2;CTNNA3	14
0.90362	0.85646	0.97372				5	11.1	71.048	230960000	135110000	95846000	184860000	97148000	87715000	301640000	177190000	124440000	NaN	P35241-5;P35241;P35241-4;P35241-2;P35241-3	P35241-5;P35241;P35241-4;P35241-2	Radixin	RDX	5
1.1693	NaN	1.0466				1	3.8	28.048	5599900	3209500	2390300	0	0	0	8634300	5101000	3533300	NaN	P35270	P35270	Sepiapterin reductase	SPR	1
0.99415	0.97585	0.97379				24	16.6	226.53	808220000	482860000	325360000	1626800000	881310000	745460000	1573500000	944300000	629250000	NaN	P35579;P35579-2;Q5BKV1;B1AH99;Q7Z406-2;Q7Z406-6;Q7Z406;A1L2Z2;A0A0C4DFM8	P35579;P35579-2	Myosin-9	MYH9	9
NaN	1.1325	1.1206				4	4.5	232.53	0	0	0	30132000	19228000	10904000	34416000	20915000	13501000	NaN	P35580-4;P35580-3;P35580-2;P35580-5;P35580	P35580-4;P35580-3;P35580-2;P35580-5;P35580	Myosin-10	MYH10	5
1.4661	1.2559	NaN				3	2.5	215.4	541440	270200	271240	487570	224020	263550	0	0	0	NaN	P35658-5;P35658-3;P35658;P35658-4;P35658-2;A0A0A0MSW3;H0Y837;B7ZAV2;E9PKD2	P35658-5;P35658-3;P35658;P35658-4;P35658-2	Nuclear pore complex protein Nup214	NUP214	9
0.92564	0.93896	0.83496				1	3	228.09	8409200	5060000	3349300	65613000	35653000	29960000	58291000	35552000	22740000	NaN	P35749-2;P35749;P35749-3;P35749-4	P35749-2;P35749;P35749-3;P35749-4	Myosin-11	MYH11	4
0.94295	1.6938	NaN				4	11.8	48.633	29901000	16968000	12933000	19034000	9119400	9915000	0	0	0	NaN	P35998;C9JLS9;P35998-2	P35998;C9JLS9	26S protease regulatory subunit 7	PSMC2	3
0.78472	0.837	0.88324				1	3.7	32.996	30164000	17957000	12207000	82553000	44582000	37971000	44314000	27155000	17159000	NaN	P36542;P36542-2	P36542;P36542-2	ATP synthase subunit gamma, mitochondrial	ATP5C1	2
1.2743	1.2939	1.2878				3	6.8	47.697	101920000	52108000	49816000	88518000	38908000	49610000	108770000	56661000	52112000	NaN	P36578;H3BM89;H3BU31;H3BTP7	P36578;H3BM89;H3BU31;H3BTP7	60S ribosomal protein L4	RPL4	4
1.0659	NaN	0.95208				2	3.1	63.79	12266000	7078000	5188000	0	0	0	21802000	12874000	8928300	NaN	P36871-2;P36871;P36871-3	P36871-2;P36871;P36871-3	Phosphoglucomutase-1	PGM1	3
0.7211	0.83893	0.74524				3	16.3	48.755	27265000	18143000	9122100	35770000	20111000	15659000	28391000	19244000	9146700	NaN	P36957;P36957-2;Q86SW4	P36957;P36957-2;Q86SW4	Dihydrolipoyllysine-residue succinyltransferase component of 2-oxoglutarate dehydrogenase complex, mitochondrial	DLST	3
0.87483	0.82833	0.82625				2	4.5	24.454	112920000	69243000	43680000	195610000	111500000	84106000	224370000	139910000	84458000	NaN	P37802-2;P37802;X6RJP6	P37802-2;P37802;X6RJP6	Transgelin-2	TAGLN2	3
1.08	1.1034	1.0704				8	22.3	37.54	192910000	103220000	89690000	965040000	482240000	482800000	550960000	295050000	255910000	NaN	P37837;F2Z393	P37837;F2Z393	Transaldolase	TALDO1	2
0.6672	0.76204	0.73788				2	6.9	37.434	17220000	12070000	5150500	52009000	30860000	21149000	47679000	32781000	14898000	NaN	P38117-2;P38117;M0QY67	P38117-2;P38117;M0QY67	Electron transfer flavoprotein subunit beta	ETFB	3
1.0125	1.1437	0.99673				9	15	73.68	199200000	114320000	84885000	67105000	33017000	34087000	278980000	165810000	113170000	NaN	P38646;D6RJI2;D6RA73	P38646	Stress-70 protein, mitochondrial	HSPA9	3
0.85987	0.69121	0.69124				2	9.5	42.592	8085600	5252400	2833200	11219000	7118300	4100400	13377000	8610500	4766700	NaN	P39748;P39748-2;F5H1Y3;I3L3E9	P39748;P39748-2;F5H1Y3;I3L3E9	Flap endonuclease 1	FEN1	4
0.85472	NaN	1.1696				1	3.4	38.498	645110	375590	269520	0	0	0	828830	425090	403740	NaN	P40121;P40121-2	P40121;P40121-2	Macrophage-capping protein	CAPG	2
NaN	0.88733	1.0103				3	10.9	58.024	0	0	0	56251000	29252000	27000000	113610000	70293000	43315000	NaN	P40227;P40227-2	P40227	T-complex protein 1 subunit zeta	CCT6A	2
1.1439	1.1264	1.2684				4	16.3	29.574	26645000	14655000	11990000	84603000	39501000	45101000	80640000	45269000	35371000	NaN	P40261	P40261	Nicotinamide N-methyltransferase	NNMT	1
0.65001	NaN	NaN				1	1.8	115.08	354660	228910	125760	0	0	0	0	0	0	NaN	P40818-2	P40818-2			1
1.0807	0.97971	0.91733				6	23	38.627	42144000	23347000	18797000	63583000	33426000	30157000	51950000	29834000	22115000	NaN	P40925-3;P40925;P40925-2;B9A041;B8ZZ51;C9JF79;C9JRL4;C9JLV6	P40925-3;P40925;P40925-2;B9A041;B8ZZ51;C9JF79	Malate dehydrogenase, cytoplasmic;Malate dehydrogenase	MDH1	8
0.71756	0.7219	0.7887				6	23.1	35.503	35558000	23997000	11561000	37264000	21982000	15282000	99200000	62360000	36841000	NaN	P40926;P40926-2;G3XAL0	P40926;P40926-2;G3XAL0	Malate dehydrogenase, mitochondrial;Malate dehydrogenase	MDH2	3
0.94471	0.90687	1.1929				6	11.3	82.999	51487000	28815000	22672000	26774000	13381000	13393000	25881000	11624000	14258000	NaN	P40939;H0YFD6	P40939	Trifunctional enzyme subunit alpha, mitochondrial;Long-chain enoyl-CoA hydratase;Long chain 3-hydroxyacyl-CoA dehydrogenase	HADHA	2
NaN	NaN	NaN				1	12.3	28.366	0	0	0	0	0	0	0	0	0	NaN	P40939-2	P40939-2			1
1.174	1.3158	1.2506				2	5.9	51.109	36850000	19995000	16855000	73830000	32164000	41666000	69010000	36347000	32663000	NaN	P41091;Q2VIR3	P41091;Q2VIR3	Eukaryotic translation initiation factor 2 subunit 3;Putative eukaryotic translation initiation factor 2 subunit 3-like protein	EIF2S3;EIF2S3L	2
1.1758	0.94931	0.87316				4	6	83.165	55914000	31835000	24079000	40381000	20903000	19478000	104640000	57915000	46728000	NaN	P41250	P41250	Glycine--tRNA ligase	GARS	1
1.1314	1.244	1.2651				5	8.1	87.334	25983000	14421000	11562000	25787000	12240000	13547000	65150000	32451000	32699000	NaN	P42224;J3KPM9;P42224-2;D2KFR9;E7EPD2;E7ENM1;E9PH66;H7BZB5	P42224;J3KPM9;P42224-2	Signal transducer and activator of transcription 1-alpha/beta	STAT1	8
NaN	NaN	NaN				1	7.8	23.364	0	0	0	0	0	0	0	0	0	NaN	P42330-2	P42330-2			1
NaN	NaN	NaN	+			1	1.8	96.983	0	0	0	0	0	0	0	0	0	NaN	P42356-2	P42356-2			1
1.0281	0.95522	1.0684				14	12.1	157.9	184710000	104290000	80417000	252710000	127710000	124990000	292140000	165290000	126850000	NaN	P42704;A0A0C4DG06;B8ZZ38;C9JCA9	P42704	Leucine-rich PPR motif-containing protein, mitochondrial	LRPPRC	4
1.201	1.2929	1.1872				12	29.3	55.52	600520000	327070000	273450000	749730000	327090000	422640000	675830000	350410000	325420000	NaN	P43490;A0A0C4DFS8;C9JG65	P43490;A0A0C4DFS8	Nicotinamide phosphoribosyltransferase	NAMPT	3
0.8198	0.92955	NaN				2	6.7	47.366	643110	387000	256110	790330	385920	404410	0	0	0	NaN	P43686;P43686-2	P43686;P43686-2	26S protease regulatory subunit 6B	PSMC4	2
0.85355	NaN	NaN				1	5.8	22.225	3163600	1387100	1776500	0	0	0	0	0	0	NaN	P45973	P45973	Chromobox protein homolog 5	CBX5	1
NaN	1.308	1.282				1	2.2	95.785	0	0	0	13648000	5736200	7912000	9257400	3982300	5275100	NaN	P45974;P45974-2	P45974;P45974-2	Ubiquitin carboxyl-terminal hydrolase 5	USP5	2
1.0653	1.5068	1.1274				1	0.7	358.69	7606700	3843900	3762900	19405000	7953700	11451000	9193300	5102300	4091100	NaN	P46013;P46013-2	P46013;P46013-2	Antigen KI-67	MKI67	2
0.75382	0.65112	0.74048				1	1.9	92.859	1345700	931980	413760	3594400	2091100	1503200	6090000	4070100	2019900	NaN	P46087-4;P46087;P46087-2	P46087-4;P46087;P46087-2	Putative ribosomal RNA methyltransferase NOP2	NOP2	3
1.382	1.1986	1.4192				2	4.7	34.362	4469000	2311500	2157500	8965800	3879500	5086400	11767000	6141600	5625000	NaN	P46777	P46777	60S ribosomal protein L5	RPL5	1
1.4314	1.346	NaN				2	13.8	18.565	9498000	4711600	4786400	8095800	3555800	4540000	0	0	0	NaN	P46778;M0R181;G3V1B3	P46778;M0R181;G3V1B3	60S ribosomal protein L21	RPL21	3
1.056	0.97971	0.86733				5	3.6	270.63	2091600	1120500	971090	36496000	22121000	14375000	14841000	9560800	5280400	NaN	P46821;D6RA32;D6RA40	P46821	Microtubule-associated protein 1B;MAP1 light chain LC1	MAP1B	3
1.3487	1.1441	0.90556				1	3.1	32.668	4421000	2567300	1853700	9195000	4347900	4847100	7536400	4226100	3310300	NaN	P46926;P46926-2	P46926;P46926-2	Glucosamine-6-phosphate isomerase 1	GNPDA1	2
0.90312	0.97999	0.90667				14	10.8	189.25	126380000	78100000	48278000	296880000	164330000	132550000	225730000	136330000	89402000	NaN	P46940;A0A0J9YXZ5;H0YLE8;Q86VI3;F2Z2E2;E9PDT6;H0YKA5	P46940;A0A0J9YXZ5;H0YLE8	Ras GTPase-activating-like protein IQGAP1	IQGAP1	7
NaN	1.5173	1.3412				1	2.4	85.238	0	0	0	412520	145330	267180	612220	295800	316420	NaN	P47712	P47712	Cytosolic phospholipase A2;Phospholipase A2;Lysophospholipase	PLA2G4A	1
1.3171	1.4892	1.3209				1	9.4	17.752	172880000	87424000	85455000	180580000	79175000	101400000	181210000	92422000	88785000	NaN	P47914	P47914	60S ribosomal protein L29	RPL29	1
0.92177	0.97508	0.94184				3	13.1	23.277	102840000	64566000	38276000	93685000	50386000	43299000	70920000	43262000	27658000	NaN	P48047;H7C0C1;H7C068	P48047	ATP synthase subunit O, mitochondrial	ATP5O	3
NaN	NaN	NaN				1	1.1	80.699	0	0	0	0	0	0	0	0	0	NaN	P48147	P48147	Prolyl endopeptidase	PREP	1
1.3417	0.94813	1.1407				2	5.4	64.149	15139000	7684300	7454600	10450000	5483400	4966900	15026000	8007000	7019300	NaN	P48163;P48163-2	P48163;P48163-2	NADP-dependent malic enzyme	ME1	2
1.089	1.1785	1.1247				2	5.1	30.727	8417400	4075500	4341900	7690500	3494200	4196300	5602400	3107300	2495100	NaN	P48507;P48507-2	P48507;P48507-2	Glutamate--cysteine ligase regulatory subunit	GCLM	2
NaN	NaN	NaN				1	2.9	50.909	0	0	0	0	0	0	0	0	0	NaN	P48735;P48735-2	P48735;P48735-2	Isocitrate dehydrogenase [NADP], mitochondrial	IDH2	2
NaN	NaN	NaN				1	6.7	19.529	0	0	0	0	0	0	0	0	0	NaN	P49006	P49006	MARCKS-related protein	MARCKSL1	1
0.89563	0.87231	0.80446				1	2.4	53.801	12579000	7776800	4802500	20534000	10690000	9844300	12622000	7729100	4893200	NaN	P49189;P49189-2	P49189;P49189-2	4-trimethylaminobutyraldehyde dehydrogenase	ALDH9A1	2
0.94079	0.71028	0.97802				2	4.8	60.533	51898000	29633000	22264000	26924000	13581000	13343000	68729000	38722000	30007000	NaN	P49368;P49368-2;B4DUR8;E9PRC8;Q5SZX9;E9PM09	P49368;P49368-2;B4DUR8;E9PRC8;Q5SZX9;E9PM09	T-complex protein 1 subunit gamma	CCT3	6
0.81398	0.9898	0.75091				3	6.9	49.541	49726000	31620000	18106000	75747000	37251000	38495000	48629000	33099000	15530000	NaN	P49411;H3BNU3	P49411	Elongation factor Tu, mitochondrial	TUFM	2
1.0531	0.9301	1.0272				7	9.4	109.32	44728000	26200000	18528000	53061000	23292000	29769000	110380000	63755000	46624000	NaN	P49588-2;P49588;H3BPK7	P49588-2;P49588	Alanine--tRNA ligase, cytoplasmic	AARS	3
0.597	0.70438	0.59669				5	10	72.926	206810000	144320000	62492000	67239000	42968000	24270000	184170000	123640000	60533000	NaN	P49748-3;P49748;P49748-2;G3V1M7;K7EQP4;J3KSR4;J3QRJ8;K7EJW8;J3QKU9	P49748-3;P49748;P49748-2	Very long-chain specific acyl-CoA dehydrogenase, mitochondrial	ACADVL	9
0.76628	0.97179	NaN				1	1.7	100.18	1594600	1016800	577880	1749100	778180	970900	0	0	0	NaN	P49756	P49756	RNA-binding protein 25	RBM25	1
NaN	1.2365	0.62252				1	1.6	358.2	0	0	0	1823600	860050	963500	858900	545170	313730	NaN	P49792	P49792	E3 SUMO-protein ligase RanBP2;Putative peptidyl-prolyl cis-trans isomerase	RANBP2	1
0.91112	NaN	0.94013				1	1.6	76.715	620410	399240	221160	0	0	0	611300	368180	243120	NaN	P49915;P49915-2	P49915;P49915-2	GMP synthase [glutamine-hydrolyzing]	GMPS	2
0.98907	0.92923	0.88293				4	14.4	50.663	96282000	53998000	42283000	100450000	51869000	48578000	158890000	96078000	62812000	NaN	P50395;Q5SX86;Q5SX90;V9GYF8;P50395-2;Q5SX87;V9GYJ7	P50395;Q5SX86;Q5SX90;V9GYF8	Rab GDP dissociation inhibitor beta	GDI2	7
0.97656	0.81386	0.94099				1	3.9	28.994	3531200	2066200	1465000	8719400	4584700	4134700	2683700	1577000	1106800	NaN	P50402;Q5HY57	P50402;Q5HY57	Emerin	EMD	2
NaN	5.5535	NaN				2	3	98.063	0	0	0	43230000	4885000	38345000	0	0	0	NaN	P50570;P50570-4;P50570-5;P50570-2;P50570-3;A0A0D9SFE4;Q05193;Q05193-2;A0A0U1RQP1;Q05193-3;Q05193-5;A0A0D9SFB1	P50570;P50570-4;P50570-5;P50570-2;P50570-3;A0A0D9SFE4;Q05193;Q05193-2;A0A0U1RQP1;Q05193-3;Q05193-5;A0A0D9SFB1	Dynamin-2;Dynamin-1	DNM2;DNM1	12
1.0017	0.85148	1.181				8	17.7	59.62	176170000	110180000	65999000	54795000	28389000	26406000	91751000	49830000	41921000	NaN	P50990;P50990-2;P50990-3;H7C4C8	P50990;P50990-2;P50990-3;H7C4C8	T-complex protein 1 subunit theta	CCT8	4
0.86064	0.92065	1.0037				2	5.9	57.924	17162000	10567000	6595400	22427000	13379000	9048100	22602000	13278000	9324000	NaN	P50991;P50991-2	P50991;P50991-2	T-complex protein 1 subunit delta	CCT4	2
NaN	NaN	NaN				1	3.2	54.389	0	0	0	0	0	0	0	0	0	NaN	P50995;P50995-2	P50995;P50995-2	Annexin A11	ANXA11	2
NaN	NaN	NaN	+			1	10	27.035	0	0	0	0	0	0	0	0	0	NaN	P51148-2;P51148	P51148-2;P51148	Ras-related protein Rab-5C	RAB5C	2
1.0326	1.0309	1.0867				3	7.7	34.752	26783000	15181000	11601000	33485000	16416000	17069000	89143000	50446000	38697000	NaN	P51572-2;P51572;C9J0M4;C9JQ75;C9JSP1;C9JMD7	P51572-2;P51572	B-cell receptor-associated protein 31	BCAP31	6
NaN	1.0527	NaN				1	4.6	30.216	0	0	0	861470	404660	456810	0	0	0	NaN	P51809-2;P51809;P51809-3	P51809-2;P51809;P51809-3	Vesicle-associated membrane protein 7	VAMP7	3
NaN	0.58521	NaN				1	1.5	83.735	0	0	0	13732000	7440500	6291100	0	0	0	NaN	P51812	P51812	Ribosomal protein S6 kinase alpha-3	RPS6KA3	1
NaN	0.86328	1.0119				5	25	28.264	0	0	0	24962000	13796000	11166000	3025700	1783500	1242100	NaN	P51858-3;P51858;P51858-2	P51858-3;P51858;P51858-2	Hepatoma-derived growth factor	HDGF	3
1.1397	1.0889	1.131				8	21.3	53.139	271180000	148490000	122690000	176250000	82439000	93806000	195890000	110420000	85470000	NaN	P52209;P52209-2;K7EPF6;K7EM49;K7EMN2;K7ELN9	P52209;P52209-2;K7EPF6;K7EM49;K7EMN2	6-phosphogluconate dehydrogenase, decarboxylating	PGD	6
1.2594	1.0153	0.8036				3	12	60.766	10656000	6055700	4600700	5470900	2561800	2909100	6771700	4413900	2357800	NaN	P52594-4;P52594;P52594-3;P52594-2;B8ZZY2;C9J2I0	P52594-4;P52594;P52594-3;P52594-2	Arf-GAP domain and FG repeat-containing protein 1	AGFG1	6
1.2848	1.4008	1.3675				2	18	36.735	382300000	190380000	191910000	477840000	194690000	283150000	462570000	224690000	237870000	NaN	P52895;Q04828;S4R3P0;B4DK69;H0Y804;A6NHU4;P52895-2	P52895;Q04828;S4R3P0;B4DK69;H0Y804;A6NHU4;P52895-2	Aldo-keto reductase family 1 member C2;Aldo-keto reductase family 1 member C1	AKR1C2;AKR1C1	7
0.86371	NaN	NaN				2	10.5	32.922	5125700	3074000	2051700	0	0	0	0	0	0	NaN	P52907	P52907	F-actin-capping protein subunit alpha-1	CAPZA1	1
0.76561	0.88047	1.277				3	10.8	33.428	18355000	11002000	7352800	30772000	13370000	17401000	3813600	2257200	1556300	NaN	P53004	P53004	Biliverdin reductase A	BLVRA	1
0.96121	0.96358	0.94139				8	7.5	120.84	257780000	149560000	108220000	261450000	136370000	125080000	317640000	189530000	128120000	NaN	P53396;P53396-2;P53396-3	P53396;P53396-2;P53396-3	ATP-citrate synthase	ACLY	3
0.81271	0.862	0.83498	+			1	2.9	36.249	1259200	730210	528980	3089600	1554300	1535300	2506700	1575600	931090	NaN	P53597	P53597	Succinyl-CoA ligase [ADP/GDP-forming] subunit alpha, mitochondrial	SUCLG1	1
0.90532	0.81984	0.85062				5	8.5	107.14	29420000	17578000	11842000	55667000	31008000	24659000	55096000	31779000	23317000	NaN	P53618;E9PP73	P53618	Coatomer subunit beta	COPB1	2
0.95347	0.79155	0.86168	+			1	2.1	79.693	446330	246220	200110	596980	345390	251580	963450	568400	395050	NaN	P53794	P53794	Sodium/myo-inositol cotransporter	SLC5A3	1
1.2042	1.0621	2.0402				2	22	14.395	973180	527270	445910	5835500	2842600	2992900	463630	199450	264180	NaN	P53999	P53999	Activated RNA polymerase II transcriptional coactivator p15	SUB1	1
1.1814	0.9802	1.1296				3	6.4	59.143	17623000	9347100	8275500	15961000	9487700	6473300	50916000	26769000	24147000	NaN	P54577;A0A0C4DGZ5	P54577;A0A0C4DGZ5	Tyrosine--tRNA ligase, cytoplasmic	YARS	2
0.90622	0.76722	0.89715				2	7	70.02	44979000	28108000	16871000	42808000	19740000	23068000	59175000	35648000	23527000	NaN	P54652	P54652	Heat shock-related 70 kDa protein 2	HSPA2	1
NaN	0.37094	0.34499				2	3.9	87.301	0	0	0	922000	643170	278830	904050	689830	214220	NaN	P54886;P54886-2	P54886;P54886-2	Delta-1-pyrroline-5-carboxylate synthase;Glutamate 5-kinase;Gamma-glutamyl phosphate reductase	ALDH18A1	2
1.3407	1.7888	1.4636				2	7.9	49.222	19975000	9455800	10519000	8933100	3530600	5402500	9260000	3712400	5547600	NaN	P55010;H0YN40;H0YLZ1	P55010;H0YN40;H0YLZ1	Eukaryotic translation initiation factor 5	EIF5	3
0.99494	1.0489	0.92057				9	11.6	110.42	60413000	34660000	25754000	51163000	24555000	26608000	93279000	59070000	34209000	NaN	P55060;P55060-3;P55060-4;P55060-2	P55060;P55060-3;P55060-4	Exportin-2	CSE1L	4
1.0141	0.91511	0.99063				6	9.1	89.321	142250000	79491000	62763000	187830000	92832000	94996000	311350000	186550000	124790000	NaN	P55072	P55072	Transitional endoplasmic reticulum ATPase	VCP	1
0.97585	1.1022	1.3264				1	2.8	40.545	2298500	1315800	982700	1836300	855260	981040	1399200	731350	667890	NaN	P55263;P55263-3	P55263;P55263-3	Adenosine kinase	ADK	2
1.049	0.9732	0.86907				4	5.6	101.11	13200000	7051700	6148100	26025000	14865000	11160000	22532000	13450000	9081700	NaN	P56192;H0YIP0;P56192-2;H0YHV5	P56192;H0YIP0	Methionine--tRNA ligase, cytoplasmic	MARS	4
NaN	NaN	NaN				1	26.8	12.323	0	0	0	0	0	0	0	0	0	NaN	P56211	P56211	cAMP-regulated phosphoprotein 19	ARPP19	1
1.0327	1.0413	1.0498				7	30.4	30.791	795360000	457200000	338160000	779120000	394700000	384420000	462080000	268050000	194040000	NaN	P60174;P60174-1;P60174-4;U3KPZ0;U3KQF3	P60174;P60174-1	Triosephosphate isomerase	TPI1	5
1.3596	NaN	1.4165				3	9.2	52.22	4193900	2225300	1968600	0	0	0	9195400	4653100	4542200	NaN	P60228;E5RGA2;E5RHS5;H0YBR5;H0YAW4;E5RIT4	P60228;E5RGA2	Eukaryotic translation initiation factor 3 subunit E	EIF3E	6
NaN	NaN	0.17812				1	18.6	11.203	0	0	0	0	0	0	649190	460200	188990	NaN	P60903	P60903	Protein S100-A10	S100A10	1
1.0377	1.0084	1.0054				2	17.3	21.258	6875500	4065200	2810400	5718000	3004900	2713100	4584000	2714400	1869600	NaN	P60953;P60953-1;Q5JYX0;Q9H4E5;P17081;P60763;Q9H4E5-2;G3V476;G3V4H1;B1AH79;F8WET9	P60953;P60953-1;Q5JYX0	Cell division control protein 42 homolog	CDC42	11
0.72064	0.89791	1.8047				1	12.1	23.668	250950	151140	99813	414450	213430	201030	358160	225050	133100	NaN	P61006;P61006-2;Q92930;P51153;H0YNE9;H0YMN7;H0YL94;H0YLJ8	P61006;P61006-2;Q92930;P51153;H0YNE9;H0YMN7;H0YL94;H0YLJ8	Ras-related protein Rab-8A;Ras-related protein Rab-8B;Ras-related protein Rab-13	RAB8A;RAB8B;RAB13	8
NaN	2.1589	NaN				1	6.7	20.313	0	0	0	2687000	1397800	1289200	0	0	0	NaN	P61009	P61009	Signal peptidase complex subunit 3	SPCS3	1
NaN	NaN	1.292				3	7.1	55.704	0	0	0	0	0	0	2885800	1362800	1523000	NaN	P61011;P61011-2;G3V4F7;G3V480	P61011;P61011-2;G3V4F7	Signal recognition particle 54 kDa protein	SRP54	4
0.81019	0.85602	0.83675				4	22.6	23.545	34282000	21721000	12561000	39943000	22447000	17496000	34450000	21977000	12473000	NaN	P61019;P61019-2;E9PKL7;Q8WUD1;Q5HYI5;H0YD31;H7C125;E9PE37	P61019;P61019-2;E9PKL7	Ras-related protein Rab-2A	RAB2A	8
1.8058	1.5124	NaN				2	9.5	22.541	1738800	760390	978440	1063000	491220	571830	0	0	0	NaN	P61026	P61026	Ras-related protein Rab-10	RAB10	1
0.91427	0.89141	1.0227				2	10.9	20.9	14353000	8549800	5803100	11404000	6293200	5110900	14908000	8808200	6099600	NaN	P61081;M0QYI6	P61081;M0QYI6	NEDD8-conjugating enzyme Ubc12	UBE2M	2
1.3285	1.4086	1.4666				3	11.4	29.945	90274000	47240000	43035000	29603000	12680000	16923000	64069000	32387000	31682000	NaN	P61247;D6RAT0;D6RG13;H0Y9Y4;E9PFI5;H0Y8L7;D6RB09;D6R9B6;D6RAS7;D6RED7;D6RI02;D6RGE0	P61247;D6RAT0;D6RG13;H0Y9Y4;E9PFI5;H0Y8L7	40S ribosomal protein S3a	RPS3A	12
1.1955	1.2831	1.3789				3	13.1	17.258	12688000	6443900	6244000	8798200	3814400	4983800	6654000	3385900	3268100	NaN	P61254;Q9UNX3;J3QRC4;E5RIT6;J3QQV1;J3QQQ9;J3QRI7;J3KTJ8;J3KSS0;E5RHH1	P61254	60S ribosomal protein L26	RPL26	10
0.87969	0.86437	0.98298				2	27.4	10.871	5744900	3363600	2381300	194790000	98069000	96722000	7782700	4523300	3259500	NaN	P61956;P61956-2;A8MU27;P55854-2;A8MUA9;P55854;Q6EEV6	P61956;P61956-2;A8MU27;P55854-2;A8MUA9;P55854;Q6EEV6	Small ubiquitin-related modifier 2;Small ubiquitin-related modifier 3;Small ubiquitin-related modifier 4	SUMO2;SUMO3;SUMO4	7
0.96006	0.75547	0.86563				3	7.3	51.028	76812000	46348000	30465000	26263000	14304000	11959000	173230000	104900000	68330000	NaN	P61978-2;P61978;P61978-3;Q5T6W2;S4R359;S4R457	P61978-2;P61978;P61978-3;Q5T6W2	Heterogeneous nuclear ribonucleoprotein K	HNRNPK	6
NaN	0.25541	0.24451				2	7.7	28.302	0	0	0	138230000	71668000	66566000	182480000	109740000	72738000	NaN	P61981	P61981	14-3-3 protein gamma;14-3-3 protein gamma, N-terminally processed	YWHAG	1
1.334	1.1318	NaN				3	15.5	22.127	2773100	1451800	1321300	9608000	5318300	4289700	0	0	0	NaN	P62081;B5MCP9	P62081	40S ribosomal protein S7	RPS7	2
1.4311	1.3447	1.3853				1	6.2	24.205	65393000	33258000	32135000	72994000	31956000	41038000	78465000	40916000	37549000	NaN	P62241;Q5JR95	P62241;Q5JR95	40S ribosomal protein S8	RPS8	2
1.0016	0.97552	1.0328				6	24.7	29.174	484670000	287030000	197640000	741910000	388930000	352990000	691040000	406760000	284270000	NaN	P62258;P62258-2;I3L3T1;B4DJF2;I3L0W5;K7EM20	P62258;P62258-2;I3L3T1;B4DJF2	14-3-3 protein epsilon	YWHAE	6
NaN	1.7884	NaN				2	13.8	17.718	0	0	0	58205000	24850000	33355000	0	0	0	NaN	P62269;J3JS69;Q5GGW2;A0A0G2JQH2	P62269;J3JS69;Q5GGW2;A0A0G2JQH2	40S ribosomal protein S18	RPS18	4
NaN	NaN	NaN				1	7.3	17.222	0	0	0	0	0	0	0	0	0	NaN	P62277	P62277	40S ribosomal protein S13	RPS13	1
0.82431	0.87498	0.92547				1	6.3	20.082	4761500	3160600	1600800	7089800	3807200	3282600	5597500	3379400	2218100	NaN	P62330	P62330	ADP-ribosylation factor 6	ARF6	1
1.6193	1.3439	1.307				3	15	29.995	97507000	49312000	48195000	158790000	70130000	88662000	164860000	85999000	78861000	NaN	P62424;Q5T8U3;Q5T8U2	P62424;Q5T8U3	60S ribosomal protein L7a	RPL7A	3
0.91844	0.87181	0.86624				3	16.7	42.009	1958000000	1162700000	795220000	1709400000	944690000	764710000	1764600000	1045700000	718870000	NaN	P62736;P68032;P68133;P63267;P63267-2;A6NL76;F6QUT6;F6UVQ4;C9JFL5;B8ZZJ2;F8WB63;C9JUM1	P62736;P68032;P68133;P63267;P63267-2;A6NL76	Actin, aortic smooth muscle;Actin, alpha cardiac muscle 1;Actin, alpha skeletal muscle;Actin, gamma-enteric smooth muscle	ACTA2;ACTC1;ACTA1;ACTG2	12
NaN	1.6637	1.0431				2	9.6	28.68	0	0	0	42835000	16130000	26705000	21191000	11095000	10096000	NaN	P62753;A2A3R7	P62753;A2A3R7	40S ribosomal protein S6	RPS6	2
1.4872	NaN	1.5755				2	16	13.742	6333700	3101000	3232700	0	0	0	12503000	5239400	7263300	NaN	P62851	P62851	40S ribosomal protein S25	RPS25	1
NaN	NaN	NaN				2	19.2	14.463	0	0	0	0	0	0	0	0	0	NaN	P62899;B7Z4C8;P62899-2;P62899-3;B7Z4E3;C9JU56;H7C2W9	P62899;B7Z4C8;P62899-2;P62899-3;B7Z4E3;C9JU56;H7C2W9	60S ribosomal protein L31	RPL31	7
1.2711	1.3198	1.1959				5	26.3	24.831	31727000	17437000	14290000	57570000	26948000	30622000	85621000	46990000	38631000	NaN	P62906	P62906	60S ribosomal protein L10a	RPL10A	1
1.301	1.2589	1.2196				2	12.9	20.252	112720000	56993000	55723000	173320000	74885000	98438000	70234000	36257000	33977000	NaN	P62913;P62913-2;Q5VVC8;Q5VVC9	P62913;P62913-2;Q5VVC8;Q5VVC9	60S ribosomal protein L11	RPL11	4
0.85717	0.78207	0.91292				5	23.6	18.012	89894000	54758000	35136000	180250000	107150000	73102000	146180000	68121000	78056000	NaN	P62937;P62937-2;C9J5S7;F8WE65	P62937;P62937-2	Peptidyl-prolyl cis-trans isomerase A	PPIA	4
0.80469	1.0866	0.93451				3	18	23.467	21536000	14110000	7425900	27808000	12694000	15114000	25617000	14530000	11086000	NaN	P63000-2;P63000;P15153;B1AH78;B1AH80;B1AH77	P63000-2;P63000;P15153;B1AH78	Ras-related C3 botulinum toxin substrate 1;Ras-related C3 botulinum toxin substrate 2	RAC1;RAC2	6
0.80062	0.96539	0.94816				1	6.8	40.361	41590000	25674000	15916000	79850000	42037000	37814000	54431000	32293000	22138000	NaN	P63096;P63096-2;C9JPP4;C9JL77	P63096;P63096-2;C9JPP4;C9JL77	Guanine nucleotide-binding protein G(i) subunit alpha-1	GNAI1	4
0.94322	1.0153	1.0056				5	24	28.036	429720000	244050000	185680000	695810000	357770000	338040000	606270000	350740000	255530000	NaN	E7EX29;P63104;P63104-2;B0AZS6;H0YB80;B7Z2E6;E7ESK7;E7EVZ2;E9PD24;E5RIR4;E5RGE1	E7EX29;P63104;P63104-2;B0AZS6;H0YB80;B7Z2E6	14-3-3 protein zeta/delta	YWHAZ	11
0.83148	0.85013	0.85188				1	20.3	41.792	3288200000	1963500000	1324700000	2655600000	1436000000	1219600000	1776100000	1063000000	713190000	NaN	P63261;I3L4N8;I3L1U9;I3L3I0;J3KT65;I3L3R2;K7EM38	P63261;I3L4N8	Actin, cytoplasmic 2;Actin, cytoplasmic 2, N-terminally processed	ACTG1	7
0.74639	0.63377	0.63724				2	17.6	49.924	42862000	28016000	14846000	69114000	43245000	25869000	5815300	3637800	2177500	NaN	P68366;P68366-2;C9JJQ8;C9JQ00;C9JEV8;C9JDL2	P68366;P68366-2	Tubulin alpha-4A chain	TUBA4A	6
0.99367	1.0352	0.93621				1	18.2	49.83	604250000	353490000	250770000	741400000	385070000	356330000	1013400000	662100000	351280000	NaN	P68371;Q13885;Q9BVA1;M0QYM7;M0R2D3;M0R042;M0QX14;M0QY37;M0QY85;M0R2T4;M0R0X0	P68371;Q13885;Q9BVA1	Tubulin beta-4B chain;Tubulin beta-2A chain;Tubulin beta-2B chain	TUBB4B;TUBB2A;TUBB2B	11
1.2871	1.2833	1.0996				4	5.1	112.42	3947700	2216400	1731300	25332000	10057000	15274000	36636000	18601000	18035000	NaN	P78347;P78347-3;P78347-4;P78347-2;P78347-5	P78347;P78347-3;P78347-4;P78347-2	General transcription factor II-I	GTF2I	5
0.98735	0.96878	0.95071				4	12.9	27.566	27840000	16544000	11296000	31608000	17434000	14174000	36132000	21126000	15006000	NaN	P78417;P78417-3;Q5TA02;P78417-2;Q5TA01	P78417;P78417-3;Q5TA02;P78417-2;Q5TA01	Glutathione S-transferase omega-1	GSTO1	5
1.1706	1.3041	1.2915				14	4.3	469.08	16298000	8183300	8115100	167010000	82109000	84899000	133090000	72664000	60425000	NaN	P78527;P78527-2;F5GX40	P78527;P78527-2	DNA-dependent protein kinase catalytic subunit	PRKDC	3
0.95112	0.97921	0.99478				10	70	22.693	231720000	134390000	97338000	336720000	167700000	169020000	375280000	217010000	158270000	NaN	P80723;P80723-2	P80723;P80723-2	Brain acid soluble protein 1	BASP1	2
0.9647	NaN	0.88747				1	7.5	20.116	462320	248300	214030	0	0	0	1216300	732170	484180	NaN	P82663	P82663	28S ribosomal protein S25, mitochondrial	MRPS25	1
0.53308	0.55369	0.57759				1	2.8	48.08	6822700	4935600	1887100	2210300	1516100	694240	4092200	2900500	1191700	NaN	P84022	P84022	Mothers against decapentaplegic homolog 3	SMAD3	1
NaN	0.9778	NaN				1	14.7	21.308	0	0	0	1319300	687720	631610	0	0	0	NaN	P84095	P84095	Rho-related GTP-binding protein RhoG	RHOG	1
NaN	1.2485	1.1044				1	2.8	56.684	0	0	0	390400	163980	226420	329410	233600	95804	NaN	P98170	P98170	E3 ubiquitin-protein ligase XIAP	XIAP	1
1.0477	1.2015	1.3949				5	26.8	25.177	55131000	31036000	24096000	77337000	37433000	39905000	92202000	53620000	38582000	NaN	Q00688	Q00688	Peptidyl-prolyl cis-trans isomerase FKBP3	FKBP3	1
0.97146	1.0604	0.84072				2	6.3	21.493	30169000	16932000	13238000	13889000	7737200	6151500	15473000	9080100	6393400	NaN	Q00765	Q00765	Receptor expression-enhancing protein 5	REEP5	1
1.0914	0.99142	1.1183				11	11.3	90.583	101400000	57503000	43902000	109470000	54009000	55458000	182280000	101410000	80864000	NaN	Q00839;Q00839-2;Q5RI18	Q00839;Q00839-2	Heterogeneous nuclear ribonucleoprotein U	HNRNPU	3
NaN	0.7566	NaN				1	13	32.103	0	0	0	335210	229400	105800	0	0	0	NaN	Q01105-2	Q01105-2			1
0.87365	0.79242	0.79915				5	12.4	51.901	3472400	2123800	1348600	20952000	11304000	9648000	54500000	33343000	21158000	NaN	Q01518;Q01518-2;Q5T0R1;Q5T0R2;Q5T0R3;Q5T0R4;Q5T0R5;Q5T0R6;Q5T0R7;Q5T0R9	Q01518;Q01518-2	Adenylyl cyclase-associated protein 1	CAP1	10
0.99645	1.0142	1.0211				6	21.4	51.804	49341000	26591000	22749000	96914000	50641000	46272000	62792000	34521000	28272000	NaN	Q02790;F5H1U3;F5H120	Q02790	Peptidyl-prolyl cis-trans isomerase FKBP4;Peptidyl-prolyl cis-trans isomerase FKBP4, N-terminally processed	FKBP4	3
1.3239	NaN	1.1496				1	3.1	32.728	36391000	18926000	17465000	0	0	0	4011600	2235600	1776000	NaN	Q02878	Q02878	60S ribosomal protein L6	RPL6	1
0.5417	NaN	0.36722				1	0.8	191.48	1336900	921790	415110	0	0	0	2709700	2024700	685060	NaN	Q02952;Q02952-2;Q02952-3	Q02952;Q02952-2;Q02952-3	A-kinase anchor protein 12	AKAP12	3
0.86955	NaN	0.8999				1	2.1	78.806	5098100	2581400	2516700	0	0	0	4837200	2759500	2077700	NaN	Q06210;Q06210-2	Q06210;Q06210-2	Glucosamine--fructose-6-phosphate aminotransferase [isomerizing] 1	GFPT1	2
0.90929	0.89691	0.8965				5	22.8	28.601	17175000	10999000	6175700	73459000	40145000	33314000	61126000	37535000	23591000	NaN	Q06323-2;Q06323;Q06323-3;H0YLU2	Q06323-2;Q06323;Q06323-3	Proteasome activator complex subunit 1	PSME1	4
0.93404	0.93596	0.88195				9	40.2	22.11	804580000	487810000	316770000	1203500000	648230000	555310000	1037700000	622980000	414750000	NaN	Q06830;A0A0A0MSI0;A0A0A0MRQ5	Q06830;A0A0A0MSI0	Peroxiredoxin-1	PRDX1	3
0.74797	0.88464	0.91038				5	13.3	66.022	91701000	57226000	34475000	54148000	29450000	24698000	74748000	41533000	33214000	NaN	Q07065	Q07065	Cytoskeleton-associated protein 4	CKAP4	1
1.1512	1.2703	1.0976				3	9.9	48.227	53749000	27680000	26069000	37832000	16719000	21113000	29695000	16169000	13526000	NaN	Q07666;Q07666-2;Q07666-3	Q07666;Q07666-2;Q07666-3	KH domain-containing, RNA-binding, signal transduction-associated protein 1	KHDRBS1	3
NaN	NaN	NaN				1	4.1	50.435	0	0	0	0	0	0	0	0	0	NaN	Q07960	Q07960	Rho GTPase-activating protein 1	ARHGAP1	1
NaN	NaN	NaN				1	2.7	58.875	0	0	0	0	0	0	0	0	0	NaN	Q07973;Q07973-2;Q07973-3	Q07973;Q07973-2;Q07973-3	1,25-dihydroxyvitamin D(3) 24-hydroxylase, mitochondrial	CYP24A1	3
NaN	NaN	NaN				1	0.7	140.96	0	0	0	0	0	0	0	0	0	NaN	Q08211	Q08211	ATP-dependent RNA helicase A	DHX9	1
NaN	NaN	0.64291				2	8.8	35.206	0	0	0	0	0	0	290730	204130	86603	NaN	Q08257;Q08257-3;Q08257-2;A6NP24;C9JH92	Q08257;Q08257-3;Q08257-2;A6NP24;C9JH92	Quinone oxidoreductase	CRYZ	5
0.80623	1.1105	1.0392				3	4.9	81.074	13413000	7533700	5879300	33604000	13881000	19724000	18956000	10009000	8946800	NaN	Q08945;A0A0U1RRK2	Q08945;A0A0U1RRK2	FACT complex subunit SSRP1	SSRP1	2
NaN	NaN	1.2474				1	2.3	86.47	0	0	0	0	0	0	2860700	1479900	1380800	NaN	Q08J23;Q08J23-2;Q08J23-3	Q08J23;Q08J23-2;Q08J23-3	tRNA (cytosine(34)-C(5))-methyltransferase	NSUN2	3
0.8283	0.80962	0.84948				38	19.8	629.09	170330000	112260000	58072000	524180000	314940000	209230000	466260000	298130000	168130000	NaN	Q09666	Q09666	Neuroblast differentiation-associated protein AHNAK	AHNAK	1
1.8221	1.6201	1.5047				8	12.4	85.862	91997000	44494000	47503000	66234000	27798000	38436000	123570000	57647000	65924000	NaN	Q12797;Q12797-10;E5RHK2;E5RG56;Q12797-2;Q12797-8;Q12797-5;A0A0A0MSK8;Q12797-6;Q12797-9;Q12797-3;Q12797-4;Q12797-7;E5RG29;A0A087WW51;G3XAN5;E5RHJ2	Q12797;Q12797-10	Aspartyl/asparaginyl beta-hydroxylase	ASPH	17
0.95042	0.91964	0.80626				5	7.2	95.807	22762000	13835000	8927400	28239000	15526000	12713000	49054000	28443000	20611000	NaN	Q12906-7;Q12906;Q12906-3;Q12906-6;Q12906-2;Q12906-4;Q12906-5;K7EKJ9;K7ER69;K7EJ09;K7EM82;K7ENK6;K7ERM6;K7EQ75	Q12906-7;Q12906;Q12906-3;Q12906-6;Q12906-2;Q12906-4;Q12906-5	Interleukin enhancer-binding factor 3	ILF3	14
1.1505	0.95105	1.1385				2	1.3	144.75	2013600	1077500	936050	3991600	2057800	1933900	4004000	2140900	1863100	NaN	Q13045;Q13045-3;Q13045-2	Q13045;Q13045-3;Q13045-2	Protein flightless-1 homolog	FLII	3
1.1202	NaN	1.0046				2	14.2	20.811	3201700	1794600	1407100	0	0	0	11527000	6970800	4556600	NaN	Q13185;S4R2Y4;B8ZZ43;C9JMM0	Q13185;S4R2Y4;B8ZZ43;C9JMM0	Chromobox protein homolog 3	CBX3	4
0.98979	0.99869	0.9446				2	3.7	100.2	27325000	15629000	11696000	45744000	23609000	22135000	56259000	33878000	22381000	NaN	Q13200;Q13200-3;Q13200-2;C9JPC0;F8WBS8	Q13200;Q13200-3;Q13200-2;C9JPC0;F8WBS8	26S proteasome non-ATPase regulatory subunit 2	PSMD2	5
1.6509	1.4736	1.7806				1	3.4	36.501	4536400	1761300	2775100	12865000	5988100	6876800	13897000	5019300	8878100	NaN	Q13347	Q13347	Eukaryotic translation initiation factor 3 subunit I	EIF3I	1
1.0638	0.95723	1.0109				4	17.1	20.63	21474000	12420000	9053900	3490200	1880600	1609600	1806000	1245400	560630	NaN	Q13442	Q13442	28 kDa heat- and acid-stable phosphoprotein	PDAP1	1
1.0852	0.99335	1.1424				2	6.1	51.212	877980	615660	262320	1511000	677220	833820	1861400	1089100	772230	NaN	Q13451	Q13451	Peptidyl-prolyl cis-trans isomerase FKBP5	FKBP5	1
0.70102	1.0214	0.77694				8	4.9	284.54	19832000	12505000	7326700	19273000	9893300	9379500	104130000	71320000	32814000	NaN	Q13813;Q13813-3;A0A0D9SGF6;Q13813-2;A0A0D9SF54;A0A0D9SFF6	Q13813;Q13813-3;A0A0D9SGF6;Q13813-2;A0A0D9SF54	Spectrin alpha chain, brain	SPTAN1	6
1.1424	1.139	1.1247				3	1.7	226.25	2367900	1357200	1010700	18985000	9097400	9887200	14804000	8414700	6389800	NaN	Q14008-3;Q14008;Q14008-2;H0YEK7;H0YCF6	Q14008-3;Q14008;Q14008-2	Cytoskeleton-associated protein 5	CKAP5	5
NaN	1.2917	1.1017				3	14.5	22.326	0	0	0	964110	437040	527080	1870900	1086600	784300	NaN	Q14116;Q14116-2	Q14116;Q14116-2	Interleukin-18	IL18	2
NaN	1.4567	1.2139				3	2.6	166.57	0	0	0	22619000	8848400	13771000	43195000	21573000	21622000	NaN	Q14152;Q14152-2	Q14152;Q14152-2	Eukaryotic translation initiation factor 3 subunit A	EIF3A	2
NaN	NaN	1.3901				1	6.2	32.233	0	0	0	0	0	0	7081300	3884600	3196700	NaN	Q14165	Q14165	Malectin	MLEC	1
0.64049	0.96615	0.88165				12	3.2	532.4	7423400	4835600	2587800	56276000	31001000	25275000	22107000	14481000	7626300	NaN	Q14204	Q14204	Cytoplasmic dynein 1 heavy chain 1	DYNC1H1	1
1.1886	NaN	1.1026				2	7.2	33.712	716460	380340	336120	0	0	0	3139500	1758000	1381500	NaN	Q14232;Q14232-2	Q14232;Q14232-2	Translation initiation factor eIF-2B subunit alpha	EIF2B1	2
1.3286	0.77174	1.2188				2	4.7	70.294	178930	91225	87708	313890	179070	134820	4451200	2071500	2379800	NaN	Q14677-3;Q14677;Q14677-2;H0YD52	Q14677-3;Q14677;Q14677-2;H0YD52	Clathrin interactor 1	CLINT1	4
0.98103	0.88587	0.9826				1	0.6	143.23	69291000	39757000	29534000	47867000	25482000	22385000	180590000	98354000	82239000	NaN	Q14683;V9GYN9	Q14683;V9GYN9	Structural maintenance of chromosomes protein 1A	SMC1A	2
NaN	0.66661	NaN				1	1.8	84.427	0	0	0	2108500	1343800	764710	0	0	0	NaN	Q14684;Q14684-2	Q14684;Q14684-2	Ribosomal RNA processing protein 1 homolog B	RRP1B	2
1.3625	1.3107	1.0741				2	11.1	26.076	3834500	2042800	1791700	10413000	5173900	5239400	3109800	1834400	1275400	NaN	Q14696	Q14696	LDLR chaperone MESD	MESDC2	1
0.9484	1.0509	1.0038				6	6.9	99.326	37597000	22486000	15111000	75171000	38719000	36451000	177300000	100590000	76706000	NaN	Q14764;H3BQK6;H3BRL2	Q14764	Major vault protein	MVP	3
1.3888	1.6431	1.59				9	33.1	35.869	110660000	51132000	59529000	291630000	105860000	185770000	138270000	59993000	78280000	NaN	Q14914;Q14914-2;Q5JVP2;F2Z3J9;F6XGT7	Q14914;Q14914-2	Prostaglandin reductase 1	PTGR1	5
0.85904	0.68106	0.93938				5	7.8	97.169	38917000	24108000	14809000	62707000	34219000	28487000	74701000	45153000	29548000	NaN	Q14974;J3QR48;Q14974-2;J3KTM9	Q14974;J3QR48	Importin subunit beta-1	KPNB1	4
0.57927	1.496	0.89969				2	4.8	51.922	25626000	15734000	9891800	7473700	4668600	2805200	5227500	3319300	1908200	NaN	Q15008-4;Q15008;Q15008-2;Q15008-3;C9J7B7	Q15008-4;Q15008;Q15008-2;Q15008-3;C9J7B7	26S proteasome non-ATPase regulatory subunit 6	PSMD6	5
NaN	0.8415	0.8543				1	3.1	46.9	0	0	0	2758300	1359100	1399200	3253700	1958800	1294900	NaN	Q15018	Q15018	BRISC complex subunit Abro1	FAM175B	1
NaN	1.3228	NaN				1	1.1	111.28	0	0	0	7946400	3863600	4082800	0	0	0	NaN	Q15042-3;Q15042;Q15042-4	Q15042-3;Q15042;Q15042-4	Rab3 GTPase-activating protein catalytic subunit	RAB3GAP1	3
NaN	NaN	NaN				2	4.8	71.496	0	0	0	0	0	0	0	0	0	NaN	Q15046-2;Q15046;H3BVA8	Q15046-2;Q15046;H3BVA8	Lysine--tRNA ligase	KARS	3
0.93663	1.0029	0.95053				5	5	162.46	4376900	2639400	1737500	6996800	3641400	3355400	14289000	8891800	5397400	NaN	Q15075	Q15075	Early endosome antigen 1	EEA1	1
0.94015	1.0786	1.0228				2	7.9	53.9	121230000	67176000	54055000	79361000	37505000	41855000	96514000	54151000	42364000	NaN	Q15084-2;Q15084-5;Q15084-4;Q15084;Q15084-3	Q15084-2;Q15084-5;Q15084-4;Q15084;Q15084-3	Protein disulfide-isomerase A6	PDIA6	5
1.1204	1.1714	1.124				11	2.5	531.78	193090000	108080000	85006000	416940000	205480000	211460000	467050000	263750000	203300000	NaN	Q15149;Q15149-2;Q15149-3;Q15149-6;Q15149-4;Q15149-5;Q15149-9;Q15149-8;Q15149-7;H0YDN1;E9PMV1	Q15149;Q15149-2;Q15149-3;Q15149-6;Q15149-4;Q15149-5;Q15149-9;Q15149-8;Q15149-7	Plectin	PLEC	11
0.9427	0.76974	0.82409				2	7.3	32.66	2182300	1254900	927370	6008800	3271700	2737100	7802100	4389100	3413000	NaN	Q15181;Q5SQT6	Q15181;Q5SQT6	Inorganic pyrophosphatase	PPA1	2
1.0122	1.0684	1.0721				5	26.2	18.697	19852000	10831000	9021000	20822000	9992300	10829000	23561000	12572000	10989000	NaN	Q15185;Q15185-4;Q15185-2;A0A087WYT3;Q15185-3;B4DDC6	Q15185;Q15185-4;Q15185-2;A0A087WYT3;Q15185-3;B4DDC6	Prostaglandin E synthase 3	PTGES3	6
0.094969	NaN	NaN				2	5.2	54.19	302400	298740	3664.7	0	0	0	0	0	0	NaN	Q15208	Q15208	Serine/threonine-protein kinase 38	STK38	1
NaN	NaN	NaN				3	15.8	36.413	0	0	0	0	0	0	0	0	0	NaN	Q15417;Q15417-2;Q15417-3;E9PDU6	Q15417;Q15417-2;Q15417-3;E9PDU6	Calponin-3	CNN3	4
0.70033	0.79475	0.85274				7	12	88.885	28750000	19481000	9268800	27246000	15991000	11255000	63992000	40135000	23857000	NaN	Q15459;Q15459-2;H7C1L2;F8WB66;F8WC79	Q15459;Q15459-2	Splicing factor 3A subunit 1	SF3A1	5
NaN	NaN	NaN				1	3	48.55	0	0	0	0	0	0	0	0	0	NaN	Q15645	Q15645	Pachytene checkpoint protein 2 homolog	TRIP13	1
0.87915	NaN	0.52752				1	15.2	10.666	235240	147860	87382	0	0	0	92366	68076	24289	NaN	Q15651	Q15651	High mobility group nucleosome-binding domain-containing protein 3	HMGN3	1
1.3127	1.0604	1.3381				2	5.5	56.598	2699100	1563700	1135500	4929700	2198100	2731600	2542100	1348300	1193800	NaN	Q15758;M0QXM4;Q15758-2;Q15758-3	Q15758;M0QXM4;Q15758-2;Q15758-3	Neutral amino acid transporter B(0)	SLC1A5	4
NaN	NaN	NaN				1	0.4	404.41	0	0	0	0	0	0	0	0	0	NaN	Q15911;Q15911-2	Q15911;Q15911-2	Zinc finger homeobox protein 3	ZFHX3	2
1.0242	0.95367	0.90907				1	5.6	44.468	1131200	633760	497410	1326800	760870	565960	1511800	932070	579730	NaN	Q16543	Q16543	Hsp90 co-chaperone Cdc37	CDC37	1
NaN	NaN	NaN				1	2.8	54.529	0	0	0	0	0	0	0	0	0	NaN	Q16658	Q16658	Fascin	FSCN1	1
1.2908	1.3259	1.2477				5	12.5	52.351	69529000	38295000	31234000	72391000	35434000	36956000	44339000	24004000	20335000	NaN	Q16719;Q16719-2;A0A087X297;A0A087WYM2;B8ZZA3;A0A087WYQ7	Q16719;Q16719-2	Kynureninase	KYNU	6
0.77061	NaN	0.74504				1	1	130.32	4249600	2689800	1559800	0	0	0	8490400	5472600	3017800	NaN	Q16760-2	Q16760-2			1
NaN	NaN	NaN				2	10.1	33.429	0	0	0	0	0	0	0	0	0	NaN	Q16762	Q16762	Thiosulfate sulfurtransferase	TST	1
1.233	1.3453	1.3974				5	8.2	89.252	31949000	16670000	15279000	77046000	34088000	42958000	74109000	36677000	37432000	NaN	Q32MZ4;Q32MZ4-2;Q32MZ4-3;Q9Y608;Q32MZ4-4;Q9Y608-5;Q9Y608-4;Q9Y608-2;C9JSU1	Q32MZ4;Q32MZ4-2;Q32MZ4-3	Leucine-rich repeat flightless-interacting protein 1	LRRFIP1	9
NaN	NaN	1.1259				2	6.2	45.547	0	0	0	0	0	0	10077000	5483300	4593700	NaN	Q52LJ0-2;Q52LJ0;H0YNA1	Q52LJ0-2;Q52LJ0;H0YNA1	Protein FAM98B	FAM98B	3
0.67822	0.81918	0.56834				5	17	32.805	27847000	18904000	8943400	19983000	12098000	7884600	27497000	18135000	9361300	NaN	Q53H82	Q53H82	Beta-lactamase-like protein 2	LACTB2	1
NaN	NaN	NaN				1	8.7	58.264	0	0	0	0	0	0	0	0	0	NaN	Q58FF6	Q58FF6	Putative heat shock protein HSP 90-beta 4	HSP90AB4P	1
1.0772	0.96868	1.0425				1	23.1	44.348	28163000	13767000	14396000	19169000	9601600	9567700	76991000	43601000	33390000	NaN	Q58FF8	Q58FF8	Putative heat shock protein HSP 90-beta 2	HSP90AB2P	1
0.68455	1.0152	NaN				1	3.8	26.923	37992000	24837000	13154000	43959000	24517000	19442000	0	0	0	NaN	Q99714;Q99714-2;Q5H928	Q99714;Q99714-2;Q5H928	3-hydroxyacyl-CoA dehydrogenase type-2	HSD17B10	3
NaN	1.2445	NaN				1	41.2	9.5251	0	0	0	8700400	3693100	5007200	0	0	0	NaN	Q5JNZ6	Q5JNZ6		RBBP7	1
NaN	NaN	1.4339				1	1.3	101.37	0	0	0	0	0	0	2167100	1182600	984560	NaN	Q5JSH3;Q5JSH3-2;Q5JSH3-4	Q5JSH3;Q5JSH3-2;Q5JSH3-4	WD repeat-containing protein 44	WDR44	3
1.2666	1.2155	1.0739				1	5	25.038	87552000	48942000	38609000	119350000	58925000	60423000	106270000	63128000	43138000	NaN	Q5JT25	Q5JT25	Ras-related protein Rab-41	RAB41	1
NaN	NaN	NaN				1	46.8	22.654	0	0	0	0	0	0	0	0	0	NaN	Q5SYQ7	Q5SYQ7		ALDH1A1	1
NaN	NaN	NaN				1	8.6	15.489	0	0	0	0	0	0	0	0	0	NaN	Q5T1J5;Q9Y6H1	Q5T1J5;Q9Y6H1	Putative coiled-coil-helix-coiled-coil-helix domain-containing protein CHCHD2P9, mitochondrial;Coiled-coil-helix-coiled-coil-helix domain-containing protein 2, mitochondrial	CHCHD2P9;CHCHD2	2
15.966	NaN	NaN				1	0.4	575.95	663890	47907	615990	0	0	0	0	0	0	NaN	Q5T4S7-2;Q5T4S7;Q5T4S7-4;Q5T4S7-3;X6R960	Q5T4S7-2;Q5T4S7;Q5T4S7-4;Q5T4S7-3;X6R960	E3 ubiquitin-protein ligase UBR4	UBR4	5
NaN	1.4546	NaN				1	8.6	20.578	0	0	0	467200	156540	310660	0	0	0	NaN	Q5T6J7;Q5T6J8	Q5T6J7;Q5T6J8	Probable gluconokinase	IDNK;C9orf103	2
1.2785	1.1925	1.3451	+			1	0.6	240.65	2814000	1422100	1391900	6474300	3013100	3461200	6850600	3329600	3521000	NaN	Q5TH69	Q5TH69	Brefeldin A-inhibited guanine nucleotide-exchange protein 3	ARFGEF3	1
1.2439	1.3022	1.0747				1	2.7	46.476	10508000	5700400	4807400	9415700	4686500	4729200	10616000	5914200	4702200	NaN	Q5VW32;Q5VW32-2	Q5VW32;Q5VW32-2	BRO1 domain-containing protein BROX	BROX	2
34.193	NaN	NaN				1	13.4	9.1746	461740	19177	442560	0	0	0	0	0	0	NaN	Q5VZY2-3	Q5VZY2-3			1
NaN	1.2533	NaN				1	13.1	9.1896	0	0	0	28038000	14330000	13708000	0	0	0	NaN	Q6FGH4	Q6FGH4		DGCR6	1
NaN	0.030899	NaN				1	5.4	33.924	0	0	0	285870	269760	16113	0	0	0	NaN	Q6IB77;Q6IB77-2	Q6IB77;Q6IB77-2	Glycine N-acyltransferase	GLYAT	2
0.65702	0.71889	0.75493				1	1.6	77.15	29201000	19333000	9867800	40247000	22246000	18001000	34608000	22578000	12031000	NaN	Q6NUQ4;Q6NUQ4-2	Q6NUQ4;Q6NUQ4-2	Transmembrane protein 214	TMEM214	2
0.68725	0.84896	0.50557				2	4.9	43.476	10595000	7218000	3377300	5558500	3088500	2469900	8831000	6559200	2271800	NaN	Q6NZI2;Q6NZI2-2;Q6NZI2-3	Q6NZI2;Q6NZI2-2;Q6NZI2-3	Polymerase I and transcript release factor	PTRF	3
0.98474	NaN	NaN				1	1.9	60.576	1453200	820140	633080	0	0	0	0	0	0	NaN	Q6P1J9	Q6P1J9	Parafibromin	CDC73	1
NaN	NaN	1.1978				1	5.6	27.128	0	0	0	0	0	0	3419200	1821900	1597300	NaN	Q6P587-3;Q6P587-2;Q6P587	Q6P587-3;Q6P587-2;Q6P587	Acylpyruvase FAHD1, mitochondrial	FAHD1	3
0.91322	0.98322	0.73019				2	4.5	70.441	12012000	7873300	4138600	9121700	4784300	4337400	45956000	29376000	16580000	NaN	Q6PCE3	Q6PCE3	Glucose 1,6-bisphosphate synthase	PGM2L1	1
NaN	NaN	NaN				1	4.4	34.593	0	0	0	0	0	0	0	0	0	NaN	Q6PD74	Q6PD74	Alpha- and gamma-adaptin-binding protein p34	AAGAB	1
1.1734	1.1634	1.0651				3	3.7	123.51	26440000	15287000	11153000	1979000	1000200	978810	48870000	28105000	20766000	NaN	Q6PKG0;Q6PKG0-3;Q659C4;Q659C4-2;A0A0B4J210;Q659C4-9;Q659C4-5;Q659C4-6;Q659C4-7;H0YAX9	Q6PKG0;Q6PKG0-3	La-related protein 1	LARP1	10
2.0047	2.3944	2.2878				4	31.3	15.394	26319000	9026100	17293000	17216000	4374800	12841000	15166000	5102000	10064000	NaN	Q6PUV4;D6R960;D6RGY3;D6RBA5;D6RI05;D6RDN3	Q6PUV4;D6R960;D6RGY3;D6RBA5;D6RI05;D6RDN3	Complexin-2	CPLX2	6
1.0752	0.91245	1.0079				1	4.7	121.36	8412900	4854700	3558200	14204000	8033100	6170700	28281000	16628000	11654000	NaN	Q6S8J3;A5A3E0;P0CG38;P0CG39;A0A087X067;A0A087X092;Q6S8J3-2;A6NC16;A0A0D9SFE8;Q6S8J3-3	Q6S8J3;A5A3E0;P0CG38;P0CG39	POTE ankyrin domain family member E;POTE ankyrin domain family member F;POTE ankyrin domain family member I;POTE ankyrin domain family member J	POTEE;POTEF;POTEI;POTEJ	10
1.3341	NaN	NaN				1	2.2	45.394	6580000	3502800	3077300	0	0	0	0	0	0	NaN	Q6YN16;Q6YN16-2	Q6YN16;Q6YN16-2	Hydroxysteroid dehydrogenase-like protein 2	HSDL2	2
1.1643	1.0477	1.0695				3	3.5	102	36992000	20446000	16546000	56600000	27907000	28694000	57517000	32358000	25159000	NaN	Q7KZF4	Q7KZF4	Staphylococcal nuclease domain-containing protein 1	SND1	1
0.95073	1.2569	NaN				1	2.4	51.281	21808000	12623000	9184800	11266000	4399800	6866600	0	0	0	NaN	Q7L1Q6-3;Q7L1Q6-4;Q7L1Q6;Q7L1Q6-2	Q7L1Q6-3;Q7L1Q6-4;Q7L1Q6;Q7L1Q6-2	Basic leucine zipper and W2 domain-containing protein 1	BZW1	4
0.88406	0.94462	0.8954				1	1.3	98.2	79842000	47842000	32000000	155380000	83384000	72000000	129000000	74728000	54269000	NaN	Q7L1W4	Q7L1W4	Leucine-rich repeat-containing protein 8D	LRRC8D	1
NaN	NaN	NaN				2	6.1	42.502	0	0	0	0	0	0	0	0	0	NaN	Q7L2H7;Q7L2H7-2;H0YCQ8	Q7L2H7;Q7L2H7-2;H0YCQ8	Eukaryotic translation initiation factor 3 subunit M	EIF3M	3
NaN	0.84174	1.0734				2	2.8	116.07	0	0	0	3744400	2016700	1727700	9040100	5464400	3575800	NaN	Q7L7X3;Q9H2K8;Q7L7X3-3;H0YF68	Q7L7X3;Q9H2K8;Q7L7X3-3;H0YF68	Serine/threonine-protein kinase TAO1;Serine/threonine-protein kinase TAO3	TAOK1;TAOK3	4
NaN	NaN	NaN				1	2.4	76.12	0	0	0	0	0	0	0	0	0	NaN	Q7Z417	Q7Z417	Nuclear fragile X mental retardation-interacting protein 2	NUFIP2	1
1.2447	0.94839	1.2313				1	2.6	56.527	9737400	5092500	4645000	9001100	4836400	4164700	11207000	6016500	5190900	NaN	Q7Z434;Q7Z434-4	Q7Z434;Q7Z434-4	Mitochondrial antiviral-signaling protein	MAVS	2
NaN	0.69871	NaN				2	0.5	481.89	0	0	0	7534500	4688600	2845900	0	0	0	NaN	Q7Z6Z7;Q7Z6Z7-3;Q7Z6Z7-2	Q7Z6Z7;Q7Z6Z7-3;Q7Z6Z7-2	E3 ubiquitin-protein ligase HUWE1	HUWE1	3
1.0812	1.1013	1.1634				14	14.4	156.27	92399000	50412000	41987000	126490000	60234000	66255000	145180000	77516000	67666000	NaN	Q86UP2;Q86UP2-4;Q86UP2-2;Q86UP2-3;G3V4Y7;B7Z6P3;G3V5P0;H0YJP2;G3V5G2;H0YJZ8;H0YJV5	Q86UP2;Q86UP2-4;Q86UP2-2;Q86UP2-3;G3V4Y7	Kinectin	KTN1	11
NaN	0.91211	0.90479				1	5.1	26.888	0	0	0	2039700	1121800	917820	15948000	9951800	5996600	NaN	Q86V81	Q86V81	THO complex subunit 4	ALYREF	1
0.85999	0.99335	0.92219				6	7.7	136.37	27498000	14553000	12944000	52709000	26537000	26172000	67364000	40619000	26744000	NaN	Q86VP6;Q86VP6-2;A0A0C4DGH5;H0YH27;Q86VP6-3	Q86VP6;Q86VP6-2	Cullin-associated NEDD8-dissociated protein 1	CAND1	5
0.9471	0.72092	0.80019				1	0.3	443.63	12851000	7627100	5223700	13621000	6982500	6638500	9866500	5866000	4000500	NaN	Q86XX4-2;Q86XX4	Q86XX4-2;Q86XX4	Extracellular matrix protein FRAS1	FRAS1	2
1.0412	1.3297	1.1387				5	4.1	616.62	3279100	1929300	1349800	21502000	10633000	10870000	17829000	10221000	7608100	NaN	Q8IVF2;Q8IVF2-3	Q8IVF2;Q8IVF2-3	Protein AHNAK2	AHNAK2	2
NaN	1.7101	NaN				2	3	91.079	0	0	0	1397200	616780	780380	0	0	0	NaN	Q8IXB1;Q8IXB1-2	Q8IXB1;Q8IXB1-2	DnaJ homolog subfamily C member 10	DNAJC10	2
NaN	NaN	NaN				1	2.3	65.019	0	0	0	8962600	8962600	0	0	0	0	NaN	Q8IYW5	Q8IYW5	E3 ubiquitin-protein ligase RNF168	RNF168	1
0.75784	0.73961	0.73581				4	6.8	102.9	4154900	2716600	1438300	18917000	11289000	7627400	16699000	10259000	6440400	NaN	Q8N163;Q8N163-2;H0YC58;E5RFJ3;E5RGU7;H0YC69;E5RHJ4	Q8N163;Q8N163-2;H0YC58;E5RFJ3;E5RGU7;H0YC69	DBIRD complex subunit KIAA1967	KIAA1967	7
0.92436	0.92586	0.97779				4	29	19.856	6832400	4009600	2822800	8145000	4285800	3859200	6312300	3913700	2398600	NaN	Q8N183;D6RA56	Q8N183	Mimitin, mitochondrial	NDUFAF2	2
NaN	NaN	NaN				1	2.4	63.472	0	0	0	0	0	0	0	0	0	NaN	Q8N1G4	Q8N1G4	Leucine-rich repeat-containing protein 47	LRRC47	1
1.0159	1.0968	1.0387				2	4.4	47.628	84689000	47369000	37320000	43854000	20775000	23078000	36695000	20408000	16287000	NaN	Q8NBS9;Q8NBS9-2	Q8NBS9;Q8NBS9-2	Thioredoxin domain-containing protein 5	TXNDC5	2
2.1708	1.3137	1.4355				3	6.9	44.965	5025900	2330500	2695400	4461400	1892500	2568900	3065300	1465600	1599700	NaN	Q8NC51;Q8NC51-2;Q8NC51-3;Q8NC51-4	Q8NC51;Q8NC51-2;Q8NC51-3;Q8NC51-4	Plasminogen activator inhibitor 1 RNA-binding protein	SERBP1	4
NaN	NaN	NaN				1	3	56.974	0	0	0	0	0	0	0	0	0	NaN	Q8NC56	Q8NC56	LEM domain-containing protein 2	LEMD2	1
NaN	1.2691	0.79554				2	11.8	31.674	0	0	0	5067800	2121300	2946500	2315100	1557800	757320	NaN	Q8NCW5;Q8NCW5-2;Q5T3I3;Q5T3I4	Q8NCW5;Q8NCW5-2;Q5T3I3;Q5T3I4	NAD(P)H-hydrate epimerase	APOA1BP	4
NaN	NaN	NaN				1	6.9	24.269	0	0	0	0	0	0	0	0	0	NaN	Q8NDC0	Q8NDC0	MAPK-interacting and spindle-stabilizing protein-like	MAPK1IP1L	1
NaN	NaN	NaN				1	1.3	140.02	0	0	0	0	0	0	0	0	0	NaN	Q8NDI1;Q8NDI1-2;Q8NDI1-3	Q8NDI1;Q8NDI1-2;Q8NDI1-3	EH domain-binding protein 1	EHBP1	3
0.78212	0.88095	1.0373				2	2.5	95.925	5519400	2968900	2550400	12105000	5867600	6237800	21414000	12914000	8500400	NaN	Q8NE71;Q8NE71-2;H0YGW7;Q5STZ8;F5GYK6	Q8NE71;Q8NE71-2;H0YGW7;Q5STZ8;F5GYK6	ATP-binding cassette sub-family F member 1	ABCF1	5
NaN	NaN	NaN				1	5	41.451	0	0	0	0	0	0	0	0	0	NaN	Q8NE79	Q8NE79	Blood vessel epicardial substance	BVES	1
0.85848	0.93041	0.8469				2	7.1	44.314	531240000	323790000	207450000	719420000	385520000	333900000	686410000	420600000	265810000	NaN	Q8NEZ2;Q8NEZ2-2;E5RG91;Q8NEZ2-3;H0YBN0;E5RJX6;E5RHB8;E5RJ10	Q8NEZ2;Q8NEZ2-2;E5RG91;Q8NEZ2-3;H0YBN0;E5RJX6;E5RHB8;E5RJ10	Vacuolar protein sorting-associated protein 37A	VPS37A	8
NaN	NaN	NaN				1	3	51.263	0	0	0	0	0	0	0	0	0	NaN	Q8NFQ8	Q8NFQ8	Torsin-1A-interacting protein 2	TOR1AIP2	1
0.78113	NaN	NaN	+			1	2.8	36.05	80328	50141	30186	0	0	0	0	0	0	NaN	Q8NGI3	Q8NGI3	Olfactory receptor 56B1	OR56B1	1
NaN	0.47299	NaN				2	1.3	182.77	0	0	0	531840	283420	248420	0	0	0	NaN	Q8NI27;A0A0C4DG98;F2Z2V2	Q8NI27;A0A0C4DG98;F2Z2V2	THO complex subunit 2	THOC2	3
0.73136	NaN	NaN				1	1.2	83.023	367070	229430	137630	0	0	0	0	0	0	NaN	Q8TBA6;Q8TBA6-2	Q8TBA6;Q8TBA6-2	Golgin subfamily A member 5	GOLGA5	2
NaN	NaN	NaN				1	5.9	21.609	0	0	0	0	0	0	0	0	0	NaN	Q8TDH9;Q8TDH9-3	Q8TDH9;Q8TDH9-3	Protein Muted homolog	MUTED	2
NaN	NaN	0.88401				1	12.9	11.748	0	0	0	0	0	0	1185400	739290	446110	NaN	Q8WUH6	Q8WUH6	UPF0444 transmembrane protein C12orf23	C12orf23	1
0.99673	0.56473	0.9608				6	8.8	96.771	48764000	27718000	21046000	62278000	31782000	30496000	48786000	27180000	21606000	NaN	Q8WUM4-2;Q8WUM4;F8WDK9;Q8WUM4-3	Q8WUM4-2;Q8WUM4	Programmed cell death 6-interacting protein	PDCD6IP	4
NaN	NaN	1.1322				1	6.2	18.925	0	0	0	0	0	0	4656300	2429200	2227100	NaN	Q8WW12;Q8WW12-2	Q8WW12;Q8WW12-2	PEST proteolytic signal-containing nuclear protein	PCNP	2
1.3445	NaN	NaN				1	1.8	76.986	260140	166110	94025	0	0	0	0	0	0	NaN	Q8WWK9;Q8WWK9-5;Q8WWK9-6	Q8WWK9;Q8WWK9-5;Q8WWK9-6	Cytoskeleton-associated protein 2	CKAP2	3
0.93039	1.2214	NaN				1	5	26.973	1962600	1245600	716940	1434700	691960	742740	0	0	0	NaN	Q92506	Q92506	Estradiol 17-beta-dehydrogenase 8	HSD17B8	1
NaN	NaN	NaN				1	2	80.313	0	0	0	0	0	0	0	0	0	NaN	Q92541	Q92541	RNA polymerase-associated protein RTF1 homolog	RTF1	1
1.0101	1.1156	1.0664				3	5.5	97.459	6412100	3554700	2857400	21198000	8395100	12803000	52884000	29156000	23728000	NaN	Q92598-4;Q92598;Q92598-3;Q92598-2;A0A0A0MSM0;Q5TBM3;R4GN69	Q92598-4;Q92598;Q92598-3;Q92598-2;A0A0A0MSM0	Heat shock protein 105 kDa	HSPH1	7
0.89052	1.0805	2.1499				1	1.4	80.551	2850700	1691000	1159700	4066400	2022200	2044300	5154400	1842300	3312100	NaN	Q92615	Q92615	La-related protein 4B	LARP4B	1
1.1172	1.185	1.0653				8	4.5	292.75	14621000	8615700	6005700	44468000	22296000	22172000	24430000	13679000	10751000	NaN	Q92616	Q92616	Translational activator GCN1	GCN1L1	1
1.3321	NaN	NaN				1	3.8	35.964	5145300	2139400	3005900	0	0	0	0	0	0	NaN	Q92820	Q92820	Gamma-glutamyl hydrolase	GGH	1
0.76615	1.5608	NaN				2	4.8	80.272	52725000	27124000	25600000	5618900	2232500	3386500	0	0	0	NaN	Q92841;Q92841-2;Q92841-3;Q92841-1;J3QRQ7;J3KRZ1	Q92841;Q92841-2;Q92841-3;Q92841-1	Probable ATP-dependent RNA helicase DDX17	DDX17	6
0.7715	1.2333	0.94881				3	2.7	154.59	779270	331530	447740	4731700	2228400	2503300	21082000	11174000	9907900	NaN	Q92878-2;Q92878;Q92878-3	Q92878-2;Q92878;Q92878-3	DNA repair protein RAD50	RAD50	3
NaN	NaN	1.3019				1	1.7	137.22	0	0	0	0	0	0	790140	422390	367750	NaN	Q92896-2;Q92896-3;Q92896	Q92896-2;Q92896-3;Q92896	Golgi apparatus protein 1	GLG1	3
NaN	NaN	NaN				1	4.8	39.933	0	0	0	0	0	0	0	0	0	NaN	Q96A49	Q96A49	Synapse-associated protein 1	SYAP1	1
1.1527	0.9227	1.0618				2	8.8	34.93	94020000	51517000	42503000	117590000	58213000	59376000	82799000	44891000	37908000	NaN	Q96AG4	Q96AG4	Leucine-rich repeat-containing protein 59	LRRC59	1
NaN	0.68022	NaN				1	3.3	26.697	0	0	0	2739100	1648100	1091000	0	0	0	NaN	Q96C19	Q96C19	EF-hand domain-containing protein D2	EFHD2	1
NaN	NaN	NaN				1	3.8	38.472	0	0	0	0	0	0	0	0	0	NaN	Q96DX7	Q96DX7	Tripartite motif-containing protein 44	TRIM44	1
NaN	NaN	1.1944				2	3.7	62.554	0	0	0	0	0	0	100240	49312	50931	NaN	Q96F45;Q96F45-2	Q96F45;Q96F45-2	Zinc finger protein 503	ZNF503	2
NaN	NaN	0.71193				1	1.9	67.728	0	0	0	0	0	0	6403400	4134100	2269300	NaN	Q96HC4-6;Q96HC4;Q96HC4-4;Q96HC4-7;Q96HC4-2;Q96HC4-3	Q96HC4-6;Q96HC4;Q96HC4-4;Q96HC4-7;Q96HC4-2;Q96HC4-3	PDZ and LIM domain protein 5	PDLIM5	6
0.67917	0.77032	0.83503				4	11.6	46.51	43983000	28761000	15222000	30132000	18161000	11971000	32323000	21383000	10940000	NaN	Q96I99;Q96I99-2;E9PDQ8;H0Y852	Q96I99;Q96I99-2;E9PDQ8	Succinyl-CoA ligase [GDP-forming] subunit beta, mitochondrial	SUCLG2	4
0.54792	0.97647	0.95652				3	8.6	52.878	13696000	9550500	4145500	13289000	6733800	6555200	7458900	4300000	3159000	NaN	Q96KP4;Q96KP4-2;J3QKT2;A0A087WYZ1;J3KSV5;J3QL02;J3QRA8;J3QRD0;J3QKQ0;J3QLU1;J3QR27;J3QQN6;J3KSS4;J3QRP4	Q96KP4;Q96KP4-2;J3QKT2;A0A087WYZ1;J3KSV5;J3QL02;J3QRA8;J3QRD0;J3QKQ0;J3QLU1;J3QR27;J3QQN6;J3KSS4	Cytosolic non-specific dipeptidase	CNDP2	14
0.75252	0.7836	0.72388				1	2.5	52.764	8140300	4835400	3304900	13184000	6575300	6609100	5934900	4232500	1702400	NaN	Q96N66;Q96N66-2	Q96N66;Q96N66-2	Lysophospholipid acyltransferase 7	MBOAT7	2
1.0917	NaN	NaN				2	5.3	50.127	2704200	1423800	1280500	0	0	0	0	0	0	NaN	Q96Q11;Q96Q11-2;F8W8C3;C9JRS7;Q96Q11-3	Q96Q11;Q96Q11-2;F8W8C3;C9JRS7;Q96Q11-3	CCA tRNA nucleotidyltransferase 1, mitochondrial	TRNT1	5
1.1176	1.0316	0.92421				3	5.8	91.706	6630200	3745100	2885200	4069300	1588700	2480500	8710600	4824100	3886500	NaN	Q96QK1;I3L4P4;I3L4S0	Q96QK1	Vacuolar protein sorting-associated protein 35	VPS35	3
NaN	NaN	NaN				1	5.4	62.022	0	0	0	0	0	0	0	0	0	NaN	Q96S66;Q96S66-2;Q96S66-3;Q96S66-4	Q96S66;Q96S66-2;Q96S66-3;Q96S66-4	Chloride channel CLIC-like protein 1	CLCC1	4
1.0066	0.75346	1.1936				2	8.3	29.965	7836900	4756500	3080400	3898300	2215200	1683100	10766000	6282900	4483100	NaN	Q99436	Q99436	Proteasome subunit beta type-7	PSMB7	1
NaN	NaN	NaN				1	7.1	23.026	0	0	0	0	0	0	0	0	0	NaN	Q99470	Q99470	Stromal cell-derived factor 2	SDF2	1
0.90791	0.86186	0.93899				3	21.4	17.328	7890300	4797000	3093300	12546000	7128200	5418300	5392900	3064900	2327900	NaN	Q99471;H3BPF6;Q99471-3;H3BMQ1;Q99471-2	Q99471;H3BPF6	Prefoldin subunit 5	PFDN5	5
0.89596	1.1365	0.93312				4	13	41.92	33969000	19951000	14018000	45960000	21705000	24255000	60795000	36983000	23812000	NaN	Q99536;Q99536-3;Q99536-2;K7ESA3;K7EM19;K7ENX2;K7EJM4	Q99536;Q99536-3;Q99536-2;K7ESA3;K7EM19;K7ENX2	Synaptic vesicle membrane protein VAT-1 homolog	VAT1	7
NaN	NaN	1.2404				1	1.1	114.71	0	0	0	0	0	0	7372500	3795600	3576900	NaN	Q99575	Q99575	Ribonucleases P/MRP protein subunit POP1	POP1	1
1.0395	0.88286	0.88794				6	15.1	59.366	83516000	47367000	36149000	105520000	54757000	50759000	129420000	77042000	52377000	NaN	Q99832;Q99832-3;F8WAM2;Q99832-4;Q99832-2;F8WBP8	Q99832;Q99832-3;F8WAM2	T-complex protein 1 subunit eta	CCT7	6
NaN	NaN	NaN				1	7.4	22.655	0	0	0	0	0	0	0	0	0	NaN	Q9BRP8;Q9BRP8-2	Q9BRP8;Q9BRP8-2	Partner of Y14 and mago	WIBG	2
1.0323	NaN	NaN				1	2.4	54.736	302100	161860	140240	0	0	0	0	0	0	NaN	Q9BRS8;Q9BRS8-2	Q9BRS8;Q9BRS8-2	La-related protein 6	LARP6	2
NaN	0.88152	1.0942	+			2	5.2	25.764	0	0	0	171990	89510	82480	4260900	2713500	1547400	NaN	Q9BRX8;Q9BRX8-2	Q9BRX8;Q9BRX8-2	Redox-regulatory protein FAM213A	FAM213A	2
NaN	NaN	NaN				1	3.6	47.524	0	0	0	0	0	0	0	0	0	NaN	Q9BSU1	Q9BSU1	UPF0183 protein C16orf70	C16orf70	1
NaN	1.1382	0.95854				1	0.6	243.87	0	0	0	439100	227030	212070	358780	237230	121550	NaN	Q9BTC0;Q9BTC0-1;Q9BTC0-3;Q9BTC0-2	Q9BTC0;Q9BTC0-1;Q9BTC0-3;Q9BTC0-2	Death-inducer obliterator 1	DIDO1	4
NaN	NaN	NaN				1	3.8	20.126	0	0	0	0	0	0	0	0	0	NaN	Q9BTE1	Q9BTE1	Dynactin subunit 5	DCTN5	1
NaN	NaN	1.2807				1	7.3	26.056	0	0	0	0	0	0	110010	59888	50119	NaN	Q9BVG4	Q9BVG4	UPF0368 protein Cxorf26	CXorf26	1
1.108	1.7415	1.2363				1	2.5	41.617	26483000	13388000	13094000	18861000	8555500	10306000	6692300	3495900	3196400	NaN	Q9BXA7	Q9BXA7	Testis-specific serine/threonine-protein kinase 1	TSSK1B	1
1.1183	1.3071	1.285				3	12.9	21.445	4649500	2663600	1986000	4499300	1915400	2583800	12590000	6511700	6078100	NaN	Q9BY32;Q9BY32-3;Q9BY32-2	Q9BY32;Q9BY32-3	Inosine triphosphate pyrophosphatase	ITPA	3
NaN	NaN	NaN				1	1.4	103.13	0	0	0	0	0	0	0	0	0	NaN	Q9BZQ8	Q9BZQ8	Protein Niban	FAM129A	1
1.2706	0.86683	1.332				1	25.5	10.897	1152400	490550	661810	1878700	805560	1073200	3247100	1823700	1423400	NaN	Q9GZP8;Q9GZP8-2	Q9GZP8;Q9GZP8-2	Immortalization up-regulated protein	IMUP	2
NaN	NaN	NaN				1	6.2	21.527	0	0	0	0	0	0	0	0	0	NaN	Q9H061;Q9H061-2	Q9H061;Q9H061-2	Transmembrane protein 126A	TMEM126A	2
NaN	NaN	NaN				1	1.7	65.389	0	0	0	0	0	0	0	0	0	NaN	Q9H172-2	Q9H172-2			1
1.1413	NaN	1.0596				1	1.2	142.69	2099900	1252500	847370	0	0	0	7443000	3919000	3524000	NaN	Q9H2G2;Q9H2G2-2	Q9H2G2;Q9H2G2-2	STE20-like serine/threonine-protein kinase	SLK	2
NaN	0.88234	0.84273				1	5	31.705	0	0	0	3805600	2129700	1675900	4570900	2951800	1619100	NaN	Q9H2W6	Q9H2W6	39S ribosomal protein L46, mitochondrial	MRPL46	1
0.66618	1.1032	NaN				1	3	60.593	13393000	7181000	6211800	6985400	2904300	4081100	0	0	0	NaN	Q9H3P7	Q9H3P7	Golgi resident protein GCP60	ACBD3	1
0.70787	0.71243	0.68394				1	4.5	24.95	2979300	1945100	1034200	10184000	5934400	4249900	4085900	2740700	1345100	NaN	Q9H444	Q9H444	Charged multivesicular body protein 4b	CHMP4B	1
NaN	0.89484	NaN				1	1.4	82.322	0	0	0	5290800	2991900	2299000	0	0	0	NaN	Q9H6S3-3;Q9H6S3;Q9H6S3-2	Q9H6S3-3;Q9H6S3;Q9H6S3-2	Epidermal growth factor receptor kinase substrate 8-like protein 2	EPS8L2	3
0.8751	0.90225	NaN				1	3.4	48.674	4879000	2755700	2123300	6420500	3043100	3377400	0	0	0	NaN	Q9H8Y8-3;Q9H8Y8;Q9H8Y8-2	Q9H8Y8-3;Q9H8Y8;Q9H8Y8-2	Golgi reassembly-stacking protein 2	GORASP2	3
NaN	0.9217	NaN				2	9	35.619	0	0	0	3029700	1564400	1465300	0	0	0	NaN	Q9H9B4;D6RFI0;S4R2X2;D6RDG7	Q9H9B4;D6RFI0;S4R2X2;D6RDG7	Sideroflexin-1	SFXN1	4
0.7453	0.72653	0.83918				2	11.1	24.279	1167700	715930	451810	2611700	1532100	1079600	3808300	2549900	1258400	NaN	Q9HAV7	Q9HAV7	GrpE protein homolog 1, mitochondrial	GRPEL1	1
0.74398	NaN	NaN				2	5.8	50.83	639950	364660	275290	0	0	0	0	0	0	NaN	Q9HB40;Q9HB40-2;I3L4Z9	Q9HB40;Q9HB40-2;I3L4Z9	Retinoid-inducible serine carboxypeptidase	SCPEP1	3
NaN	0.81531	0.84507				4	25	26.21	0	0	0	20986000	11540000	9445900	10566000	6117600	4448400	NaN	Q9HB71;Q9HB71-3;Q9HB71-2;B2ZWH1	Q9HB71;Q9HB71-3	Calcyclin-binding protein	CACYBP	4
NaN	NaN	NaN	+			1	1.9	83.197	7386700	7386700	0	0	0	0	0	0	0	NaN	Q9HCC9-5	Q9HCC9-5			1
NaN	1.4029	0.75093				1	4	29.45	0	0	0	2754400	1222500	1531900	4583800	2652100	1931700	NaN	Q9HD33;Q9HD33-2;Q9HD33-3	Q9HD33;Q9HD33-2;Q9HD33-3	39S ribosomal protein L47, mitochondrial	MRPL47	3
1.5821	1.7804	NaN				1	6.3	30.062	1750100	1080900	669210	13225000	4742400	8482300	0	0	0	NaN	Q9NQ88	Q9NQ88	Probable fructose-2,6-bisphosphatase TIGAR	TIGAR	1
NaN	0.70165	NaN				1	2.4	49.844	0	0	0	7307300	4619700	2687600	0	0	0	NaN	Q9NR12;Q9NR12-2	Q9NR12;Q9NR12-2	PDZ and LIM domain protein 7	PDLIM7	2
0.72173	0.83303	0.78953				3	15.2	22.367	15077000	9851400	5225900	18294000	10541000	7753500	23724000	15151000	8573400	NaN	Q9NR31;Q9Y6B6;D6RD69;D6RDB2;Q5SQT8;D6RAA2;X1WI22;Q9NR31-2;H0Y5E8	Q9NR31;Q9Y6B6;D6RD69;D6RDB2;Q5SQT8;D6RAA2;X1WI22	GTP-binding protein SAR1a;GTP-binding protein SAR1b	SAR1A;SAR1B	9
1.1013	0.98052	0.98809				2	8.9	40.307	5425800	2926900	2498900	10439000	5608800	4830000	5889700	3446500	2443100	NaN	Q9NR45	Q9NR45	Sialic acid synthase	NANS	1
0.80158	0.66728	0.85571				1	14.8	15.521	959760	577790	381970	3494700	2017100	1477600	645000	442250	202750	NaN	Q9NS69	Q9NS69	Mitochondrial import receptor subunit TOM22 homolog	TOMM22	1
0.99512	0.93142	0.94222				1	2	66.115	1999400	1212900	786510	12512000	5982100	6530300	25250000	14155000	11094000	NaN	Q9NSD9;Q9NSD9-2	Q9NSD9;Q9NSD9-2	Phenylalanine--tRNA ligase beta subunit	FARSB	2
NaN	NaN	0.72277				1	3.3	33.932	0	0	0	0	0	0	8509500	5458800	3050700	NaN	Q9NUJ1;Q9NUJ1-2	Q9NUJ1;Q9NUJ1-2	Abhydrolase domain-containing protein 10, mitochondrial	ABHD10	2
0.8302	1.4587	NaN				1	7.4	22.417	378430	264790	113640	640950	264720	376230	0	0	0	NaN	Q9NV56	Q9NV56	MRG-binding protein	MRGBP	1
NaN	NaN	NaN				1	1.3	71.368	0	0	0	0	0	0	0	0	0	NaN	Q9NVI7;Q9NVI7-2	Q9NVI7;Q9NVI7-2	ATPase family AAA domain-containing protein 3A	ATAD3A	2
NaN	1.0184	NaN				2	18.4	18.364	0	0	0	2428700	1259900	1168700	0	0	0	NaN	Q9NX14-2;Q9NX14	Q9NX14-2;Q9NX14	NADH dehydrogenase [ubiquinone] 1 beta subcomplex subunit 11, mitochondrial	NDUFB11	2
1.2561	1.3035	1.286				3	10.2	39.315	14613000	7170000	7443000	20610000	8416800	12193000	16050000	8479500	7570800	NaN	Q9NXG2;H3BNW0	Q9NXG2	THUMP domain-containing protein 1	THUMPD1	2
NaN	NaN	NaN				2	6.2	39.594	0	0	0	0	0	0	0	0	0	NaN	Q9NYL9;H0YNJ8;H0YKU1	Q9NYL9;H0YNJ8;H0YKU1	Tropomodulin-3	TMOD3	3
1.2082	1.3305	1.3374				4	5.4	125.27	25001000	13385000	11616000	23028000	9467400	13560000	28258000	12712000	15547000	NaN	Q9NZB2-6;Q9NZB2;Q9NZB2-4;A0A0C4DG79;Q9NZB2-5;Q9NZB2-2;A0A0C4DH52	Q9NZB2-6;Q9NZB2;Q9NZB2-4;A0A0C4DG79	Constitutive coactivator of PPAR-gamma-like protein 1	FAM120A	7
0.82351	0.96632	0.83752				4	6.4	63.48	49350000	26290000	23060000	30121000	14662000	15458000	108910000	64291000	44616000	NaN	Q9NZI8;Q9NZI8-2	Q9NZI8;Q9NZI8-2	Insulin-like growth factor 2 mRNA-binding protein 1	IGF2BP1	2
0.75643	0.7874	0.96474				5	3	234.71	13929000	8845700	5083500	45376000	26244000	19132000	36611000	15585000	21025000	NaN	Q9NZM1;Q9NZM1-3;Q9NZM1-6;Q9NZM1-2;Q9NZM1-5;H0YD14;Q9NZM1-7;Q9NZM1-8	Q9NZM1;Q9NZM1-3;Q9NZM1-6;Q9NZM1-2;Q9NZM1-5;H0YD14	Myoferlin	MYOF	8
0.98089	0.96305	1.003				3	12.6	32.613	13000000	7943600	5056900	29380000	15393000	13987000	37506000	22852000	14654000	NaN	Q9P0L0-2;Q9P0L0;J3QKM9	Q9P0L0-2;Q9P0L0	Vesicle-associated membrane protein-associated protein A	VAPA	3
NaN	NaN	NaN				1	2.9	56.084	0	0	0	0	0	0	0	0	0	NaN	Q9P258	Q9P258	Protein RCC2	RCC2	1
1.0407	1.0254	1.009				4	3.8	134.46	48122000	25632000	22490000	40015000	19524000	20491000	151450000	86607000	64840000	NaN	Q9P2J5;Q9P2J5-2;Q9P2J5-3;A0A087WXY1	Q9P2J5;Q9P2J5-2	Leucine--tRNA ligase, cytoplasmic	LARS	4
NaN	0.65945	NaN				1	6.7	38.695	0	0	0	3147700	1822500	1325200	0	0	0	NaN	U3KQ56;Q9UBQ7	U3KQ56;Q9UBQ7	Glyoxylate reductase/hydroxypyruvate reductase	GRHPR	2
0.92783	1.0513	2.0985				1	1.4	71.223	19804000	11223000	8581200	27023000	12854000	14169000	46311000	26821000	19490000	NaN	Q9UBT2;Q9UBT2-2	Q9UBT2;Q9UBT2-2	SUMO-activating enzyme subunit 2	UBA2	2
0.93335	NaN	NaN				1	1.6	81.895	2773400	1451200	1322100	0	0	0	0	0	0	NaN	Q9UBT7;Q9UBT7-2;Q9UBT7-3	Q9UBT7;Q9UBT7-2;Q9UBT7-3	Alpha-catulin	CTNNAL1	3
NaN	NaN	0.045718				1	1.1	88.754	0	0	0	0	0	0	139130000	134250000	4877400	NaN	Q9UBV2;Q9UBV2-2	Q9UBV2;Q9UBV2-2	Protein sel-1 homolog 1	SEL1L	2
1.595	1.5404	1.3216	+			1	3.9	46.643	2593800	1238400	1355400	29175000	13965000	15210000	15188000	8194300	6993300	NaN	Q9UDX3;Q9UDX3-2	Q9UDX3;Q9UDX3-2	SEC14-like protein 4	SEC14L4	2
NaN	NaN	0.79305	+			1	4	28.466	0	0	0	0	0	0	1935600	1144300	791220	NaN	Q9UFN0	Q9UFN0	Protein NipSnap homolog 3A	NIPSNAP3A	1
NaN	1.074	NaN				1	5.4	18.82	0	0	0	1251400	594090	657300	0	0	0	NaN	Q9UFW8	Q9UFW8	CGG triplet repeat-binding protein 1	CGGBP1	1
1.0847	NaN	1.2577				1	2.6	47.996	1245800	662080	583730	0	0	0	838790	457380	381410	NaN	Q9UGI8;Q9UGI8-2	Q9UGI8;Q9UGI8-2	Testin	TES	2
3.1433	NaN	NaN				1	1.7	87.996	6322700	1655500	4667100	0	0	0	0	0	0	NaN	Q9UGP8	Q9UGP8	Translocation protein SEC63 homolog	SEC63	1
NaN	NaN	1.0907				1	2.1	70.729	0	0	0	0	0	0	6106100	3893700	2212400	NaN	Q9UHB9;Q9UHB9-2;Q9UHB9-4;Q9UHB9-3	Q9UHB9;Q9UHB9-2;Q9UHB9-4;Q9UHB9-3	Signal recognition particle 68 kDa protein	SRP68	4
0.93231	0.9036	0.8989				2	4.1	65.401	84046000	50612000	33433000	34359000	17437000	16922000	87743000	53917000	33825000	NaN	Q9UHD8;Q9UHD8-5;Q9UHD8-2;Q9UHD8-7;Q9UHD8-3;Q9UHD8-8;Q9UHD8-9;Q9UHD8-4;K7EL40;K7EK18;K7EQD7;K7ER14;K7EIE4;K7ER52;K7ELJ9;K7EJZ2;K7EJ51;K7ENQ5;K7EN52;K7EKN4;K7EIR4;K7ERG1	Q9UHD8;Q9UHD8-5;Q9UHD8-2;Q9UHD8-7;Q9UHD8-3;Q9UHD8-8;Q9UHD8-9;Q9UHD8-4;K7EL40;K7EK18;K7EQD7;K7ER14;K7EIE4;K7ER52;K7ELJ9;K7EJZ2;K7EJ51;K7ENQ5;K7EN52;K7EKN4;K7EIR4;K7ERG1	Septin-9	2017-09-09	22
NaN	NaN	NaN				1	2.7	65.695	0	0	0	0	0	0	0	0	0	NaN	Q9UHD9;Q9UMX0;Q9UMX0-2;Q9UMX0-4	Q9UHD9;Q9UMX0;Q9UMX0-2;Q9UMX0-4	Ubiquilin-2;Ubiquilin-1	UBQLN2;UBQLN1	4
1.0725	0.83519	NaN				3	17.5	16.648	6014900	3534200	2480800	10123000	5621000	4501700	0	0	0	NaN	Q9UHV9	Q9UHV9	Prefoldin subunit 2	PFDN2	1
0.78801	0.98548	0.80736				3	12.8	25.565	14053000	8980100	5072600	6421200	3550400	2870900	7054200	4309300	2744900	NaN	Q9UIJ7;Q9UIJ7-3;Q9UIJ7-2	Q9UIJ7;Q9UIJ7-3;Q9UIJ7-2	GTP:AMP phosphotransferase, mitochondrial	AK3	3
1.2247	NaN	NaN	+			1	3.1	37.277	1657600	1103900	553700	0	0	0	0	0	0	NaN	Q9UJ72	Q9UJ72	Annexin A10	ANXA10	1
1.046	NaN	NaN				1	3.4	55.799	566750	283770	282980	0	0	0	0	0	0	NaN	Q9UJA5;Q9UJA5-4	Q9UJA5;Q9UJA5-4	tRNA (adenine(58)-N(1))-methyltransferase non-catalytic subunit TRM6	TRMT6	2
NaN	NaN	0.93563				1	2.4	74.303	0	0	0	0	0	0	11861000	7140200	4720300	NaN	Q9UJS0-2;Q9UJS0	Q9UJS0-2;Q9UJS0	Calcium-binding mitochondrial carrier protein Aralar2	SLC25A13	2
NaN	1.0695	0.88095				2	1.2	192.59	0	0	0	2401700	1193000	1208700	2505700	1562000	943730	NaN	Q9UKK3	Q9UKK3	Poly [ADP-ribose] polymerase 4	PARP4	1
NaN	0.76097	NaN	+			1	0.8	223.04	0	0	0	9205900	5631500	3574300	0	0	0	NaN	Q9UKX2	Q9UKX2	Myosin-2	MYH2	1
NaN	0.63541	1.0057				1	2.4	55.215	0	0	0	1446900	931610	515260	554230	273750	280480	NaN	Q9UKZ1	Q9UKZ1	UPF0760 protein C2orf29	C2orf29	1
1.2217	0.93599	1.0515				3	22.5	20.55	4126700	2336700	1790000	10897000	5781300	5116100	9483600	5244000	4239600	NaN	Q9ULC4-3;Q9ULC4;Q9ULC4-2	Q9ULC4-3;Q9ULC4;Q9ULC4-2	Malignant T-cell-amplified sequence 1	MCTS1	3
NaN	NaN	NaN				1	1.4	87.638	0	0	0	0	0	0	0	0	0	NaN	Q9UN66	Q9UN66	Protocadherin beta-8	PCDHB8	1
0.99235	NaN	1.0514				2	9.1	40.816	20998000	12459000	8538700	0	0	0	19557000	11233000	8324000	NaN	Q9UNZ2-5;Q9UNZ2;Q9UNZ2-4;F2Z2K0;Q9UNZ2-6	Q9UNZ2-5;Q9UNZ2;Q9UNZ2-4;F2Z2K0;Q9UNZ2-6	NSFL1 cofactor p47	NSFL1C	5
1.0421	1.0474	0.95876				10	30.5	43.786	226660000	128250000	98406000	132100000	69719000	62385000	78525000	44437000	34088000	NaN	Q9UQ80;Q9UQ80-2;F8VR77;F8W0A3;H0YIN7;F8VZ69	Q9UQ80;Q9UQ80-2;F8VR77	Proliferation-associated protein 2G4	PA2G4	6
0.9045	0.96779	1.0221				4	11.4	50.227	31670000	18117000	13553000	33662000	17306000	16356000	77797000	46592000	31206000	NaN	Q9Y265;Q9Y265-2;E7ETR0;H7C4G5	Q9Y265;Q9Y265-2;E7ETR0	RuvB-like 1	RUVBL1	4
1.2693	1.0957	1.324				5	19.6	38.242	8378800	4363600	4015200	16017000	8355800	7661100	19140000	10607000	8532400	NaN	Q9Y266;A0A0A0MSU9;A0A0A0MSS4	Q9Y266	Nuclear migration protein nudC	NUDC	3
0.80634	0.73733	0.49307				2	8.5	30.789	12347000	7976300	4370400	32671000	19155000	13516000	36193000	24335000	11858000	NaN	Q9Y277-2;Q9Y277;E5RHZ6;E5RJN6;E5RFP6;E5RK27	Q9Y277-2;Q9Y277;E5RHZ6;E5RJN6;E5RFP6;E5RK27	Voltage-dependent anion-selective channel protein 3	VDAC3	6
0.73639	0.96055	0.99433				1	1.4	129.52	1528200	933630	594530	6227500	2768000	3459500	2983500	1910800	1072700	NaN	Q9Y2A7-2;Q9Y2A7	Q9Y2A7-2;Q9Y2A7	Nck-associated protein 1	NCKAP1	2
NaN	NaN	NaN				1	7.5	15.892	0	0	0	0	0	0	0	0	0	NaN	Q9Y2V2	Q9Y2V2	Calcium-regulated heat stable protein 1	CARHSP1	1
NaN	NaN	0.90458				1	1.7	108.66	0	0	0	0	0	0	569870	285800	284060	NaN	Q9Y2W1	Q9Y2W1	Thyroid hormone receptor-associated protein 3	THRAP3	1
1.3417	1.0939	NaN				1	6.8	20.683	309730	165040	144690	392190	167870	224320	0	0	0	NaN	Q9Y3B7;Q9Y3B7-2	Q9Y3B7;Q9Y3B7-2	39S ribosomal protein L11, mitochondrial	MRPL11	2
NaN	NaN	NaN				1	8.4	21.77	0	0	0	0	0	0	0	0	0	NaN	Q9Y3D9	Q9Y3D9	28S ribosomal protein S23, mitochondrial	MRPS23	1
1.1575	0.87921	NaN				4	16.3	39.777	3027700	1607800	1419900	29778000	13537000	16241000	0	0	0	NaN	Q9Y3F4-2;Q9Y3F4;H0YH33	Q9Y3F4-2;Q9Y3F4;H0YH33	Serine-threonine kinase receptor-associated protein	STRAP	3
1.0843	1.1041	0.99867				24	13.5	269.76	233280000	134600000	98678000	506150000	259750000	246400000	422270000	246230000	176030000	NaN	Q9Y490;Q9Y4G6;A0A1B0GVU7;A0A1C7CYV7;H0YMT1	Q9Y490	Talin-1	TLN1	5
NaN	NaN	NaN				1	3.5	43.87	0	0	0	0	0	0	0	0	0	NaN	Q9Y570-4;Q9Y570	Q9Y570-4;Q9Y570	Protein phosphatase methylesterase 1	PPME1	2
1.0261	1.1975	1.0957				1	2.2	71.45	9256600	5169200	4087400	8920500	4348600	4571900	14590000	7921100	6668900	NaN	Q9Y5K6	Q9Y5K6	CD2-associated protein	CD2AP	1
NaN	0.62055	0.48109				1	1.8	91.957	0	0	0	1245400	769950	475430	2325100	1691200	633850	NaN	Q9Y5V3-2;Q9Y5V3	Q9Y5V3-2;Q9Y5V3	Melanoma-associated antigen D1	MAGED1	2
NaN	1.0552	NaN				1	5.9	22.875	0	0	0	5627000	2548900	3078000	0	0	0	NaN	Q9Y5Z4;Q9Y5Z4-2	Q9Y5Z4;Q9Y5Z4-2	Heme-binding protein 2	HEBP2	2
1.0879	1.0076	1.1725				3	8.1	40.422	14989000	8250500	6738900	84845000	39614000	45232000	17497000	9072900	8423700	NaN	Q9Y617;Q9Y617-2	Q9Y617;Q9Y617-2	Phosphoserine aminotransferase	PSAT1	2
3.4636	NaN	0.7237				3	5	97.717	3561400	1049900	2511500	0	0	0	24616000	14218000	10398000	NaN	Q9Y678;H0Y8X7;D6RG17	Q9Y678	Coatomer subunit gamma-1	COPG1	3
1.161	0.58519	NaN				2	9.9	28.772	3143500	1966300	1177100	9476500	5911100	3565400	0	0	0	NaN	Q9Y696	Q9Y696	Chloride intracellular channel protein 4	CLIC4	1
0.59692	0.79418	0.60723				1	6.9	33.331	11944000	8193400	3751100	32929000	19381000	13548000	19167000	13846000	5320800	NaN	Q9Y6C9	Q9Y6C9	Mitochondrial carrier homolog 2	MTCH2	1
0.97405	0.98851	0.94458				6	22.6	49.203	20828000	12113000	8715900	19201000	10687000	8513800	8259100	4655900	3603200	NaN	P17980;R4GNH3;E9PM69;E9PMD8;E9PN50;E9PKD5;E9PLG2	P17980;R4GNH3;E9PM69;E9PMD8;E9PN50;E9PKD5	26S protease regulatory subunit 6A	PSMC3	7
NaN	NaN	1.4567		+		1	0.8	133.38	0	0	0	0	0	0	6704900	3760600	2944300	NaN	REV__Q14679;REV__E7EX20;REV__C9J3I1	REV__Q14679;REV__E7EX20;REV__C9J3I1			3
NaN	1.0357	NaN		+		1	9.4	16.78	0	0	0	678120	336060	342050	0	0	0	NaN	REV__C9JH18	REV__C9JH18			1
0.82335	NaN	1.0685		+		1	3.3	29.804	1365200	794780	570430	0	0	0	915370	547290	368080	NaN	REV__P35232;REV__C9JW96;REV__E9PCW0;REV__E7ESE2;REV__C9JZ20	REV__P35232;REV__C9JW96;REV__E9PCW0;REV__E7ESE2;REV__C9JZ20			5
1.4335	NaN	1.3218		+		1	5	32.914	3903600	1866600	2037000	0	0	0	2789100	1317300	1471800	NaN	REV__E9PMD8	REV__E9PMD8			1
1.1201	1.1962	1.1013		+		1	7.4	13.987	50688000	26432000	24256000	109560000	49700000	59860000	118530000	63972000	54562000	NaN	REV__F5GWG7	REV__F5GWG7			1
0.68074	1.3428	1.0744		+		1	3.2	40.811	466580000	252410000	214160000	286560000	138400000	148160000	225010000	87595000	137410000	NaN	REV__F5H0M1;REV__J3QQZ2	REV__F5H0M1;REV__J3QQZ2			2
NaN	0.45046	NaN		+		1	5.1	28.433	0	0	0	201500	72201	129300	0	0	0	NaN	REV__P25788;REV__P25788-2;REV__G3V4X5;REV__H0YJ03	REV__P25788;REV__P25788-2;REV__G3V4X5;REV__H0YJ03			4
1.1887	1.457	1.0882		+		1	0.2	507.69	244020000	128150000	115870000	370420000	155320000	215100000	325240000	176130000	149120000	NaN	REV__Q9P225;REV__Q9P225-2;REV__I3L520	REV__Q9P225;REV__Q9P225-2;REV__I3L520			3
1.3337	1.3743	1.5822		+		1	14	14.274	157810000	74638000	83167000	204690000	85733000	118950000	164300000	75816000	88486000	NaN	REV__K7EPF9	REV__K7EPF9			1
0.95246	NaN	0.87767	+	+		1	1.9	47.551	556070000	327860000	228210000	0	0	0	730570000	435980000	294600000	NaN	REV__O15394-2	REV__O15394-2			1
0.72021	0.98922	NaN	+	+		1	1.1	74.157	2228300	1476700	751620	7908500	4300300	3608200	0	0	0	NaN	REV__Q6UWU2;REV__Q6UWU2-2	REV__Q6UWU2;REV__Q6UWU2-2			2
0.76399	0.79259	0.76534		+		1	0.5	231.38	4517700	2905600	1612000	4888200	2746000	2142200	6681700	4337500	2344200	NaN	REV__Q8WYB5;REV__Q8WYB5-2;REV__Q8WYB5-3	REV__Q8WYB5;REV__Q8WYB5-2;REV__Q8WYB5-3			3
0.95626	0.68876	0.85356		+		1	0.3	596.33	1225000	803920	421120	1267100	827730	439350	356750	232030	124730	NaN	REV__Q9HC84	REV__Q9HC84			1
1.9461	1.7505	1.084	+	+		1	4.3	31.642	5793100	3991700	1801400	9874200	4776900	5097300	4577800	2411800	2166000	NaN	REV__Q9Y272	REV__Q9Y272			1
